# Supplementary material
Source: MDPI journal article supplement (https://www.mdpi.com/2306-5729/9/2/23)
Supplement: s1 [file s1]

Archive with 3 entries (3 files):
- Supplementary file S1_Active-Q_modyfied.pdf
- Supplementary file S2_Data.xlsx
- Supplementary file S3_Corresponding MET values.pdf
