# Supplementary material
Source: MDPI journal article supplement (https://www.mdpi.com/2306-5729/9/2/23)
Supplement: s1 [file s1]

**Part of the Greek version [1,2] of Active-Q – A Web-based Physical Activity Questionnaire for Adults plus twenty more questions (in English) which used in the present study; extension of previous studies/joint project [3].**

The following questions concern some of your personal characteristics, incidence of Severe Acute Respiratory Syndrome Coronavirus 2 (SARS-CoV-2) re-infections, pre-illness vaccination history, and sports-related physical activity, disease severity, and illness treatment after SARS-CoV-2 infection as well during the \_\_/\_\_/2023

**Follow-up questions regarding regular sporting activities.**

**Selected activities in the previous screening question are presented to the respondent.**

How often do you participate in the following sports or the following activities and for how long each time?

|                                  | Number of times                                                                                                                                                                                                                                                         | Time per session                                                                                                                                                                                                                                                   |
|----------------------------------|-------------------------------------------------------------------------------------------------------------------------------------------------------------------------------------------------------------------------------------------------------------------------|--------------------------------------------------------------------------------------------------------------------------------------------------------------------------------------------------------------------------------------------------------------------|
| Aerobics or cardio fitness class | <ul style="list-style-type: none"> <li>❖ 1 - 3 times a month</li> <li>❖ Once a week</li> <li>❖ 2 - 3 times a week</li> <li>❖ 4 - 5 times a week</li> <li>❖ 6 - 7 times a week</li> <li>❖ Other or Does not apply to me or Don't know or Don't want to answer</li> </ul> | <ul style="list-style-type: none"> <li>❖ Less than 30 minutes</li> <li>❖ 30 - 59 minutes</li> <li>❖ 60 - 119 minutes</li> <li>❖ 2 - 4 hours</li> <li>❖ More than 4 hours</li> <li>❖ Other or Does not apply to me or Don't know or Don't want to answer</li> </ul> |
| Weight lifting                   | <ul style="list-style-type: none"> <li>❖ 1 - 3 times a month</li> <li>❖ Once a week</li> <li>❖ 2 - 3 times a week</li> <li>❖ 4 - 5 times a week</li> <li>❖ 6 - 7 times a week</li> <li>❖ Other or Does not apply to me or Don't know or Don't want to answer</li> </ul> | <ul style="list-style-type: none"> <li>❖ Less than 30 minutes</li> <li>❖ 30 - 59 minutes</li> <li>❖ 60 - 119 minutes</li> <li>❖ 2 - 4 hours</li> <li>❖ More than 4 hours</li> <li>❖ Other or Does not apply to me or Don't know or Don't want to answer</li> </ul> |
| Jogging, running or orienteering | <ul style="list-style-type: none"> <li>❖ 1 - 3 times a month</li> <li>❖ Once a week</li> <li>❖ 2 - 3 times a week</li> <li>❖ 4 - 5 times a week</li> <li>❖ 6 - 7 times a week</li> <li>❖ Other or Does not apply to me or Don't know or Don't want to answer</li> </ul> | <ul style="list-style-type: none"> <li>❖ Less than 30 minutes</li> <li>❖ 30 - 59 minutes</li> <li>❖ 60 - 119 minutes</li> <li>❖ 2 - 4 hours</li> <li>❖ More than 4 hours</li> <li>❖ Other or Does not apply to me or Don't know or Don't want to answer</li> </ul> |

|                                                                        |                                                                                                                                                                                                                                                                         |                                                                                                                                                                                                                                                                    |
|------------------------------------------------------------------------|-------------------------------------------------------------------------------------------------------------------------------------------------------------------------------------------------------------------------------------------------------------------------|--------------------------------------------------------------------------------------------------------------------------------------------------------------------------------------------------------------------------------------------------------------------|
| Athletics, (e.g. high jump, long jump or three-step)                   | <ul style="list-style-type: none"> <li>❖ 1 - 3 times a month</li> <li>❖ Once a week</li> <li>❖ 2 - 3 times a week</li> <li>❖ 4 - 5 times a week</li> <li>❖ 6 - 7 times a week</li> <li>❖ Other or Does not apply to me or Don't know or Don't want to answer</li> </ul> | <ul style="list-style-type: none"> <li>❖ Less than 30 minutes</li> <li>❖ 30 - 59 minutes</li> <li>❖ 60 - 119 minutes</li> <li>❖ 2 - 4 hours</li> <li>❖ More than 4 hours</li> <li>❖ Other or Does not apply to me or Don't know or Don't want to answer</li> </ul> |
| Spinning or cycling in demanding terrain                               | <ul style="list-style-type: none"> <li>❖ 1 - 3 times a month</li> <li>❖ Once a week</li> <li>❖ 2 - 3 times a week</li> <li>❖ 4 - 5 times a week</li> <li>❖ 6 - 7 times a week</li> <li>❖ Other or Does not apply to me or Don't know or Don't want to answer</li> </ul> | <ul style="list-style-type: none"> <li>❖ Less than 30 minutes</li> <li>❖ 30 - 59 minutes</li> <li>❖ 60 - 119 minutes</li> <li>❖ 2 - 4 hours</li> <li>❖ More than 4 hours</li> <li>❖ Other or Does not apply to me or Don't know or Don't want to answer</li> </ul> |
| Swimming                                                               | <ul style="list-style-type: none"> <li>❖ 1 - 3 times a month</li> <li>❖ Once a week</li> <li>❖ 2 - 3 times a week</li> <li>❖ 4 - 5 times a week</li> <li>❖ 6 - 7 times a week</li> <li>❖ Other or Does not apply to me or Don't know or Don't want to answer</li> </ul> | <ul style="list-style-type: none"> <li>❖ Less than 30 minutes</li> <li>❖ 30 - 59 minutes</li> <li>❖ 60 - 119 minutes</li> <li>❖ 2 - 4 hours</li> <li>❖ More than 4 hours</li> <li>❖ Other or Does not apply to me or Don't know or Don't want to answer</li> </ul> |
| Ball sports in team (e.g. soccer, basketball, volleyball or floorball) | <ul style="list-style-type: none"> <li>❖ 1 - 3 times a month</li> <li>❖ Once a week</li> <li>❖ 2 - 3 times a week</li> <li>❖ 4 - 5 times a week</li> <li>❖ 6 - 7 times a week</li> <li>❖ Other or Does not apply to me or Don't know or Don't want to answer</li> </ul> | <ul style="list-style-type: none"> <li>❖ Less than 30 minutes</li> <li>❖ 30 - 59 minutes</li> <li>❖ 60 - 119 minutes</li> <li>❖ 2 - 4 hours</li> <li>❖ More than 4 hours</li> <li>❖ Other or Does not apply to me or Don't know or Don't want to answer</li> </ul> |
| Golf                                                                   | <ul style="list-style-type: none"> <li>❖ 1 - 3 times a month</li> <li>❖ Once a week</li> <li>❖ 2 - 3 times a week</li> <li>❖ 4 - 5 times a week</li> <li>❖ 6 - 7 times a week</li> <li>❖ Other or Does not apply to me or Don't know or Don't want to answer</li> </ul> | <ul style="list-style-type: none"> <li>❖ Less than 30 minutes</li> <li>❖ 30 - 59 minutes</li> <li>❖ 60 - 119 minutes</li> <li>❖ 2 - 4 hours</li> <li>❖ More than 4 hours</li> <li>❖ Other or Does not apply to me or Don't know or Don't want to answer</li> </ul> |

|                                    |                                                                                                                                                                                                                                                                         |                                                                                                                                                                                                                                                                    |
|------------------------------------|-------------------------------------------------------------------------------------------------------------------------------------------------------------------------------------------------------------------------------------------------------------------------|--------------------------------------------------------------------------------------------------------------------------------------------------------------------------------------------------------------------------------------------------------------------|
| Dance class or competitive dancing | <ul style="list-style-type: none"> <li>❖ 1 - 3 times a month</li> <li>❖ Once a week</li> <li>❖ 2 - 3 times a week</li> <li>❖ 4 - 5 times a week</li> <li>❖ 6 - 7 times a week</li> <li>❖ Other or Does not apply to me or Don't know or Don't want to answer</li> </ul> | <ul style="list-style-type: none"> <li>❖ Less than 30 minutes</li> <li>❖ 30 - 59 minutes</li> <li>❖ 60 - 119 minutes</li> <li>❖ 2 - 4 hours</li> <li>❖ More than 4 hours</li> <li>❖ Other or Does not apply to me or Don't know or Don't want to answer</li> </ul> |
| Horseback riding                   | <ul style="list-style-type: none"> <li>❖ 1 - 3 times a month</li> <li>❖ Once a week</li> <li>❖ 2 - 3 times a week</li> <li>❖ 4 - 5 times a week</li> <li>❖ 6 - 7 times a week</li> <li>❖ Other or Does not apply to me or Don't know or Don't want to answer</li> </ul> | <ul style="list-style-type: none"> <li>❖ Less than 30 minutes</li> <li>❖ 30 - 59 minutes</li> <li>❖ 60 - 119 minutes</li> <li>❖ 2 - 4 hours</li> <li>❖ More than 4 hours</li> <li>❖ Other or Does not apply to me or Don't know or Don't want to answer</li> </ul> |
| Ice skating, ice hockey or bandy   | <ul style="list-style-type: none"> <li>❖ 1 - 3 times a month</li> <li>❖ Once a week</li> <li>❖ 2 - 3 times a week</li> <li>❖ 4 - 5 times a week</li> <li>❖ 6 - 7 times a week</li> <li>❖ Other or Does not apply to me or Don't know or Don't want to answer</li> </ul> | <ul style="list-style-type: none"> <li>❖ Less than 30 minutes</li> <li>❖ 30 - 59 minutes</li> <li>❖ 60 - 119 minutes</li> <li>❖ 2 - 4 hours</li> <li>❖ More than 4 hours</li> <li>❖ Other or Does not apply to me or Don't know or Don't want to answer</li> </ul> |
| Skiing downhill or cross country   | <ul style="list-style-type: none"> <li>❖ 1 - 3 times a month</li> <li>❖ Once a week</li> <li>❖ 2 - 3 times a week</li> <li>❖ 4 - 5 times a week</li> <li>❖ 6 - 7 times a week</li> <li>❖ Other or Does not apply to me or Don't know or Don't want to answer</li> </ul> | <ul style="list-style-type: none"> <li>❖ Less than 30 minutes</li> <li>❖ 30 - 59 minutes</li> <li>❖ 60 - 119 minutes</li> <li>❖ 2 - 4 hours</li> <li>❖ More than 4 hours</li> <li>❖ Other or Does not apply to me or Don't know or Don't want to answer</li> </ul> |
| Martial arts (e.g. judo or karate) | <ul style="list-style-type: none"> <li>❖ 1 - 3 times a month</li> <li>❖ Once a week</li> <li>❖ 2 - 3 times a week</li> <li>❖ 4 - 5 times a week</li> <li>❖ 6 - 7 times a week</li> <li>❖ Other or Does not apply to me or Don't know or Don't want to answer</li> </ul> | <ul style="list-style-type: none"> <li>❖ Less than 30 minutes</li> <li>❖ 30 - 59 minutes</li> <li>❖ 60 - 119 minutes</li> <li>❖ 2 - 4 hours</li> <li>❖ More than 4 hours</li> <li>❖ Other or Does not apply to me or Don't know or Don't want to answer</li> </ul> |

|                                      |                                                                                                                                                                                                                                                                         |                                                                                                                                                                                                                                                                    |
|--------------------------------------|-------------------------------------------------------------------------------------------------------------------------------------------------------------------------------------------------------------------------------------------------------------------------|--------------------------------------------------------------------------------------------------------------------------------------------------------------------------------------------------------------------------------------------------------------------|
| Boxing or wrestling                  | <ul style="list-style-type: none"> <li>❖ 1 - 3 times a month</li> <li>❖ Once a week</li> <li>❖ 2 - 3 times a week</li> <li>❖ 4 - 5 times a week</li> <li>❖ 6 - 7 times a week</li> <li>❖ Other or Does not apply to me or Don't know or Don't want to answer</li> </ul> | <ul style="list-style-type: none"> <li>❖ Less than 30 minutes</li> <li>❖ 30 - 59 minutes</li> <li>❖ 60 - 119 minutes</li> <li>❖ 2 - 4 hours</li> <li>❖ More than 4 hours</li> <li>❖ Other or Does not apply to me or Don't know or Don't want to answer</li> </ul> |
| Yoga, Pilates or Tai chi             | <ul style="list-style-type: none"> <li>❖ 1 - 3 times a month</li> <li>❖ Once a week</li> <li>❖ 2 - 3 times a week</li> <li>❖ 4 - 5 times a week</li> <li>❖ 6 - 7 times a week</li> <li>❖ Other or Does not apply to me or Don't know or Don't want to answer</li> </ul> | <ul style="list-style-type: none"> <li>❖ Less than 30 minutes</li> <li>❖ 30 - 59 minutes</li> <li>❖ 60 - 119 minutes</li> <li>❖ 2 - 4 hours</li> <li>❖ More than 4 hours</li> <li>❖ Other or Does not apply to me or Don't know or Don't want to answer</li> </ul> |
| Tennis, badminton or table tennis    | <ul style="list-style-type: none"> <li>❖ 1 - 3 times a month</li> <li>❖ Once a week</li> <li>❖ 2 - 3 times a week</li> <li>❖ 4 - 5 times a week</li> <li>❖ 6 - 7 times a week</li> <li>❖ Other or Does not apply to me or Don't know or Don't want to answer</li> </ul> | <ul style="list-style-type: none"> <li>❖ Less than 30 minutes</li> <li>❖ 30 - 59 minutes</li> <li>❖ 60 - 119 minutes</li> <li>❖ 2 - 4 hours</li> <li>❖ More than 4 hours</li> <li>❖ Other or Does not apply to me or Don't know or Don't want to answer</li> </ul> |
| Squash                               | <ul style="list-style-type: none"> <li>❖ 1 - 3 times a month</li> <li>❖ Once a week</li> <li>❖ 2 - 3 times a week</li> <li>❖ 4 - 5 times a week</li> <li>❖ 6 - 7 times a week</li> <li>❖ Other or Does not apply to me or Don't know or Don't want to answer</li> </ul> | <ul style="list-style-type: none"> <li>❖ Less than 30 minutes</li> <li>❖ 30 - 59 minutes</li> <li>❖ 60 - 119 minutes</li> <li>❖ 2 - 4 hours</li> <li>❖ More than 4 hours</li> <li>❖ Other or Does not apply to me or Don't know or Don't want to answer</li> </ul> |
| Sailing, surfing, canoeing or rowing | <ul style="list-style-type: none"> <li>❖ 1 - 3 times a month</li> <li>❖ Once a week</li> <li>❖ 2 - 3 times a week</li> <li>❖ 4 - 5 times a week</li> <li>❖ 6 - 7 times a week</li> <li>❖ Other or Does not apply to me or Don't know or Don't want to answer</li> </ul> | <ul style="list-style-type: none"> <li>❖ Less than 30 minutes</li> <li>❖ 30 - 59 minutes</li> <li>❖ 60 - 119 minutes</li> <li>❖ 2 - 4 hours</li> <li>❖ More than 4 hours</li> <li>❖ Other or Does not apply to me or Don't know or Don't want to answer</li> </ul> |

|                                |                                                                                                                                                                                                                                                                         |                                                                                                                                                                                                                                                                    |
|--------------------------------|-------------------------------------------------------------------------------------------------------------------------------------------------------------------------------------------------------------------------------------------------------------------------|--------------------------------------------------------------------------------------------------------------------------------------------------------------------------------------------------------------------------------------------------------------------|
| Motor sports (e.g. motorcross) | <ul style="list-style-type: none"> <li>❖ 1 - 3 times a month</li> <li>❖ Once a week</li> <li>❖ 2 - 3 times a week</li> <li>❖ 4 - 5 times a week</li> <li>❖ 6 - 7 times a week</li> <li>❖ Other or Does not apply to me or Don't know or Don't want to answer</li> </ul> | <ul style="list-style-type: none"> <li>❖ Less than 30 minutes</li> <li>❖ 30 - 59 minutes</li> <li>❖ 60 - 119 minutes</li> <li>❖ 2 - 4 hours</li> <li>❖ More than 4 hours</li> <li>❖ Other or Does not apply to me or Don't know or Don't want to answer</li> </ul> |
| Rock climbing                  | <ul style="list-style-type: none"> <li>❖ 1 - 3 times a month</li> <li>❖ Once a week</li> <li>❖ 2 - 3 times a week</li> <li>❖ 4 - 5 times a week</li> <li>❖ 6 - 7 times a week</li> <li>❖ Other or Does not apply to me or Don't know or Don't want to answer</li> </ul> | <ul style="list-style-type: none"> <li>❖ Less than 30 minutes</li> <li>❖ 30 - 59 minutes</li> <li>❖ 60 - 119 minutes</li> <li>❖ 2 - 4 hours</li> <li>❖ More than 4 hours</li> <li>❖ Other or Does not apply to me or Don't know or Don't want to answer</li> </ul> |

### Competing

Do you compete regularly in a sport? Follow-up question if respondent reported regular physical activity.

- ❖ Yes
- ❖ No
- ❖ Other or Does not apply to me or Don't know or Don't want to answer

**Age**

How old are you? (in years)

**Weight**

How much is your weight? (in kg)

**Height**

How much is your height? (in cm)

**Sex at birth**

Please, report your sex at birth.

- ❖ Male
- ❖ Female

Please, choose, by estimation (urban proximity), the area of your permanent residence.

- ❖ Urban region,
- ❖ Peri-urban region,
- ❖ Rural or off-the-grid region,

Please, choose your educational attainment.

- ❖ Primary school certificate or lower
- ❖ Lower secondary school certificate
- ❖ Upper secondary school certificate
- ❖ Post-secondary school certificate
- ❖ Bachelor degree
- ❖ MSc/master's degree
- ❖ PhD/doctorate

Do you consider yourself to be in any of the vulnerable groups for the coronavirus?

- ❖ Yes
- ❖ No

If you consider yourself to be in one of the vulnerable groups for the coronavirus, select the high risk factor(s) that relate to you.

- ❖ Cancer
- ❖ Chronic kidney disease
- ❖ Cystic fibrosis
- ❖ Tuberculosis
- ❖ Diabetes
- ❖ Neurocognitive disorders
- ❖ Essential hypertension
- ❖ Chronic heart disease
- ❖ Chronic liver disease
- ❖ Chronic lung disease
- ❖ Stroke or cerebrovascular disease

- ❖ Organ transplant recipient
- ❖ Substance use disorders
- ❖ Sickle cell anemia or thalassemia
- ❖ HIV
- ❖ ≥65 years of age
- ❖ Obesity
- ❖ Physical disabilities
- ❖ Smoking

How many times have you been infected with the coronavirus?

- ❖ 1
- ❖ 2
- ❖ 3
- ❖ 4
- ❖ 5
- ❖ 6

If you have been sick with coronavirus more than once (if this is not the case, press "back" and correct your previous answer to continue), how long was the time interval between the LAST time you were sick with coronavirus and the LAST time you were sick with coronavirus?

- ❖ 1-3 months
- ❖ 3-6 months
- ❖ 6-9 months
- ❖ 9-12 months
- ❖ 12-15 months
- ❖ 15-18 months
- ❖ 18-21 months

Please, select the total number of coronavirus vaccine doses you have received, regardless of vaccine type, and up to the LAST time you had the coronavirus.

- ❖ 0
- ❖ 1
- ❖ 2
- ❖ 3
- ❖ 4
- ❖ 5

You stated that you had a coronavirus vaccine dose prior to the LAST time you had the coronavirus (regardless of the type of vaccine), if this is not the case, press "back" and correct your previous answer to continue.

Please, select the type of vaccine you have been given since you have had one dose up to the LAST time you were sick.

- ❖ mRNA
- ❖ Viral vector
- ❖ Protein subunit

❖ Combination of vaccines

You stated that you had two coronavirus vaccine doses prior to the LAST time you had the coronavirus (regardless of the type of vaccine), if this is not the case, press "back" and correct your previous answer to continue.

Please, select the type of vaccines you have been given since you have had two doses up to the LAST time you were sick.

|                           |                        |                        |
|---------------------------|------------------------|------------------------|
| ❖ mRNA                    | ❖ 1 <sup>st</sup> dose | ❖ 2 <sup>nd</sup> dose |
| ❖ Viral vector            | ❖ 1 <sup>st</sup> dose | ❖ 2 <sup>nd</sup> dose |
| ❖ Protein subunit         | ❖ 1 <sup>st</sup> dose | ❖ 2 <sup>nd</sup> dose |
| ❖ Combination of vaccines | ❖ 1 <sup>st</sup> dose | ❖ 2 <sup>nd</sup> dose |

You stated that you had three coronavirus vaccine doses prior to the LAST time you had the coronavirus (regardless of the type of vaccines), if this is not the case, press "back" and correct your previous answer to continue.

Please, select the type of vaccines you have been given since you have had two doses up to the LAST time you were sick.

|                           |                        |                        |                        |
|---------------------------|------------------------|------------------------|------------------------|
| ❖ mRNA                    | ❖ 1 <sup>st</sup> dose | ❖ 2 <sup>nd</sup> dose | ❖ 3 <sup>rd</sup> dose |
| ❖ Viral vector            | ❖ 1 <sup>st</sup> dose | ❖ 2 <sup>nd</sup> dose | ❖ 3 <sup>rd</sup> dose |
| ❖ Protein subunit         | ❖ 1 <sup>st</sup> dose | ❖ 2 <sup>nd</sup> dose | ❖ 3 <sup>rd</sup> dose |
| ❖ Combination of vaccines | ❖ 1 <sup>st</sup> dose | ❖ 2 <sup>nd</sup> dose | ❖ 3 <sup>rd</sup> dose |

You stated that you had four coronavirus vaccine doses prior to the LAST time you had the coronavirus (regardless of the type of vaccines), if this is not the case, press "back" and correct your previous answer to continue.

Please, select the types of vaccines you have been given since you have had two doses up to the LAST time you were sick.

|                           |                        |                        |                        |                        |
|---------------------------|------------------------|------------------------|------------------------|------------------------|
| ❖ mRNA                    | ❖ 1 <sup>st</sup> dose | ❖ 2 <sup>nd</sup> dose | ❖ 3 <sup>rd</sup> dose | ❖ 4 <sup>th</sup> dose |
| ❖ Viral vector            | ❖ 1 <sup>st</sup> dose | ❖ 2 <sup>nd</sup> dose | ❖ 3 <sup>rd</sup> dose | ❖ 4 <sup>th</sup> dose |
| ❖ Protein subunit         | ❖ 1 <sup>st</sup> dose | ❖ 2 <sup>nd</sup> dose | ❖ 3 <sup>rd</sup> dose | ❖ 4 <sup>th</sup> dose |
| ❖ Combination of vaccines | ❖ 1 <sup>st</sup> dose | ❖ 2 <sup>nd</sup> dose | ❖ 3 <sup>rd</sup> dose | ❖ 4 <sup>th</sup> dose |

You stated that you had five coronavirus vaccine doses prior to the LAST time you had the coronavirus (regardless of the type of vaccines), if this is not the case, press "back" and correct your previous answer to continue.

Please, select the types of vaccines you have been given since you have had two doses up to the LAST time you were sick.

|                           |                        |                        |                        |                        |                        |
|---------------------------|------------------------|------------------------|------------------------|------------------------|------------------------|
| ❖ mRNA                    | ❖ 1 <sup>st</sup> dose | ❖ 2 <sup>nd</sup> dose | ❖ 3 <sup>rd</sup> dose | ❖ 4 <sup>th</sup> dose | ❖ 5 <sup>th</sup> dose |
| ❖ Viral vector            | ❖ 1 <sup>st</sup> dose | ❖ 2 <sup>nd</sup> dose | ❖ 3 <sup>rd</sup> dose | ❖ 4 <sup>th</sup> dose | ❖ 5 <sup>th</sup> dose |
| ❖ Protein subunit         | ❖ 1 <sup>st</sup> dose | ❖ 2 <sup>nd</sup> dose | ❖ 3 <sup>rd</sup> dose | ❖ 4 <sup>th</sup> dose | ❖ 5 <sup>th</sup> dose |
| ❖ Combination of vaccines | ❖ 1 <sup>st</sup> dose | ❖ 2 <sup>nd</sup> dose | ❖ 3 <sup>rd</sup> dose | ❖ 4 <sup>th</sup> dose | ❖ 5 <sup>th</sup> dose |

How long was the time interval between the LAST dose and the LAST dose of the vaccine if you had at least two doses of the coronavirus vaccine prior to the LAST time you had the coronavirus (regardless of the type of vaccine)? (if this is not the case, press "back" and correct your previous answer to continue)

- ❖ 1-3 months
- ❖ 3-6 months



- ❖ 6-9 months
- ❖ 9-12 months
- ❖ 12-15 months
- ❖ 15-18 months
- ❖ 18-21 months

How long was the time interval from your LAST vaccine dose (even if you only received one dose and regardless of the type of vaccine) to your LAST illness from the coronavirus? (if this is not the case, press "back" and correct your previous answer to continue)

- ❖ 1-3 months
- ❖ 3-6 months
- ❖ 6-9 months
- ❖ 9-12 months
- ❖ 12-15 months
- ❖ 15-18 months
- ❖ 18-21 months

During your (LAST) illness with coronavirus, how often did you have .....

|                          |            |            |             |            |              |
|--------------------------|------------|------------|-------------|------------|--------------|
| ❖ Fever exceeding 38°C   | ❖ Sporadic | ❖ Episodic | ❖ Recurrent | ❖ Frequent | ❖ Persistent |
| ❖ Dyspnea                | ❖ Sporadic | ❖ Episodic | ❖ Recurrent | ❖ Frequent | ❖ Persistent |
| ❖ Chills                 | ❖ Sporadic | ❖ Episodic | ❖ Recurrent | ❖ Frequent | ❖ Persistent |
| ❖ Cough                  | ❖ Sporadic | ❖ Episodic | ❖ Recurrent | ❖ Frequent | ❖ Persistent |
| ❖ Sore throat            | ❖ Sporadic | ❖ Episodic | ❖ Recurrent | ❖ Frequent | ❖ Persistent |
| ❖ Generalized body aches | ❖ Sporadic | ❖ Episodic | ❖ Recurrent | ❖ Frequent | ❖ Persistent |
| ❖ Chest pain             | ❖ Sporadic | ❖ Episodic | ❖ Recurrent | ❖ Frequent | ❖ Persistent |
| ❖ Abdominal pain         | ❖ Sporadic | ❖ Episodic | ❖ Recurrent | ❖ Frequent | ❖ Persistent |
| ❖ Back pain              | ❖ Sporadic | ❖ Episodic | ❖ Recurrent | ❖ Frequent | ❖ Persistent |
| ❖ Joint pain             | ❖ Sporadic | ❖ Episodic | ❖ Recurrent | ❖ Frequent | ❖ Persistent |
| ❖ Headache               | ❖ Sporadic | ❖ Episodic | ❖ Recurrent | ❖ Frequent | ❖ Persistent |
| ❖ Weakness               | ❖ Sporadic | ❖ Episodic | ❖ Recurrent | ❖ Frequent | ❖ Persistent |
| ❖ Fatigue                | ❖ Sporadic | ❖ Episodic | ❖ Recurrent | ❖ Frequent | ❖ Persistent |
| ❖ Altered mental status  | ❖ Sporadic | ❖ Episodic | ❖ Recurrent | ❖ Frequent | ❖ Persistent |
| ❖ Diarrhea               | ❖ Sporadic | ❖ Episodic | ❖ Recurrent | ❖ Frequent | ❖ Persistent |
| ❖ Vomiting               | ❖ Sporadic | ❖ Episodic | ❖ Recurrent | ❖ Frequent | ❖ Persistent |
| ❖ Loss of smell          | ❖ Sporadic | ❖ Episodic | ❖ Recurrent | ❖ Frequent | ❖ Persistent |
| ❖ Loss of taste          | ❖ Sporadic | ❖ Episodic | ❖ Recurrent | ❖ Frequent | ❖ Persistent |

Please, choose, your treatment during your (LAST) illness from coronavirus .....

- ❖ No treatment,
- ❖ Home remedies,
- ❖ Prescribed medication,
- ❖ Hospital admission,
- ❖ ICU admission,

*The entire modified Greek version of Active-Q – [4,5] A Web-based Physical Activity Questionnaire for Adults (in English) is presented elsewhere [1].*

#### References

1. Bourdas, D.I.; Zacharakis, E.D. Evolution of changes in physical activity over lockdown time: Physical activity datasets of four independent adult sample groups corresponding to each of the last four of the six COVID-19 lockdown weeks in Greece. *Data Br.* **2020**, *32*, 106301, doi:10.1016/j.dib.2020.106301.
2. Bourdas, D.I.; Zacharakis, E.D. Impact of COVID-19 Lockdown on Physical Activity in a Sample of Greek Adults. *Sports* **2020**, *8*, 139, doi:10.3390/sports8100139.
3. Bourdas, D.I.; Bakirtzoglou, P.; Travlos, A.K.; Andrianopoulos, V. Exploring the Impact of COVID-19 on Physical Activity One Month after Infection and Its Potential Determinants : Re-Infections , Pre-Illness Vaccination Profiles / Types , and Beyond. *Vaccines (Basel)* **2023**, *11*, 1431, doi:10.3390/vaccines11091431.
4. Bonn, S.E.; Bergman, P.; Trolle Lagerros, Y.; Sjölander, A.; Bälter, K. A Validation Study of the Web-Based Physical Activity Questionnaire Active-Q Against the GENE Accelerometer. *JMIR Res. Protoc.* **2015**, *4*, e86, doi:10.2196/resprot.3896.
5. Bonn, S.E.; Lagerros, Y.T.; Christensen, S.E.; Möller, E.; Wright, A.; Sjölander, A.; Bälter, K. Active-Q: Validation of the web-based physical activity questionnaire using doubly labeled water. *J. Med. Internet Res.* **2012**, *14*, doi:10.2196/jmir.1974.
