# Supplementary material
Source: MDPI journal article supplement (https://www.mdpi.com/2306-5729/9/2/23)
Supplement: s1 [file s1]

**Table S1.** Items included in Active-Q questionnaire and corresponding MET values [1].

| <b>Sporting activities</b>                                  | <b>MET value</b> |
|-------------------------------------------------------------|------------------|
| Aerobics or cardio fitness class                            | 6.5              |
| Weight lifting                                              | 6                |
| Jogging, running or orienteering                            | 8                |
| Athletics, (eg, high jump, long jump or three-step)         | 6                |
| Spinning or cycling in demanding terrain                    | 8.5              |
| Swimming                                                    | 6                |
| Martial arts (eg judo or karate)                            | 10               |
| Boxing or wrestling                                         | 6                |
| Yoga, Pilates or Tai chi                                    | 3                |
| Tennis, badminton or table tennis                           | 7                |
| Squash                                                      | 7.3              |
| Sailing, surfing, canoeing or rowing                        | 3                |
| Ball sports in team (eg, soccer, basketball, or volleyball) | 6                |
| Golf                                                        | 4.5              |
| Dance class or competitive dancing                          | 4.5              |
| Horseback riding                                            | 4                |
| Ice skating, ice hockey or bandy                            | 7                |
| Skiing downhill or cross country                            | 7                |
| Motor sports (eg, motorcross)                               | 4                |
| Rock climbing                                               | 8                |
| Other                                                       | 2.5              |

Abbreviations: MET=metabolic equivalent task ( $=3.5 \text{ mlO}_2 \cdot \text{kg}^{-1} \cdot \text{min}^{-1}$ ); Other = Other or Does not apply to me or Don't know or Don't want to answer.

1. Ainsworth, B.E.; Haskell, W.L.; Herrmann, S.D.; Meckes, N.; Bassett, D.R.; Tudor-Locke, C.; Greer, J.L.; Vezina, J.; Whitt-Glover, M.C.; Leon, A.S. 2011 compendium of physical activities: A second update of codes and MET values. *Med. Sci. Sports Exerc.* **2011**, *43*, 1575–1581, doi:10.1249/MSS.0b013e31821ece12.
