# Supplementary material
Source: MDPI journal article supplement (https://www.mdpi.com/2306-5729/9/2/23)
Supplement: s1 [file s1 › Supplementary file S2_Data.xlsx]

## Sheet: data-metadata
Serial time code number	Age (yr)	GR_Age	Height (cm)	Body mass (kg)	BMI (kg·m−2)	GR_BMI	GR_Sex at birth	GR_Ethnicity	GR_Region of residence	GR_Education level	GR_sprots-related PA levels	GR_Number of Underlying medical conditions	GR_Vaccine profile	GR_Vaccination type/s	GR_Incidence of SARS-CoV-2 re-infections	GR_Disease Severity categories	GR_Illness treatment
1	63	4	180	105	32.4074	4	1	1	1	7	3	2	2	4	1	2	2
2	51	3	171	88	30.0947	4	1	1	1	7	4	2	3	2	1	3	1
3	51	3	171	88	30.0947	4	1	1	1	7	3	2	3	2	1	3	1
4	43	2	180	76	23.4568	2	1	1	1	7	4	1	2	2	1	2	2
5	61	4	195	101	26.5615	3	1	1	1	7	4	1	3	5	2	4	3
6	44	2	186	97	28.0379	3	1	1	1	3	4	1	2	2	1	2	2
7	43	2	181	101	30.8293	4	1	1	1	6	3	2	3	5	1	2	2
8	52	3	173	82	27.3982	3	1	1	1	6	1	2	3	2	1	2	3
9	39	2	159	76	30.0621	4	2	1	1	3	1	3	1	1	2	3	2
10	50	3	171	78	26.6749	3	1	1	1	6	2	2	1	1	1	2	2
11	50	3	155	66	27.4714	3	2	1	1	6	1	1	2	2	1	2	2
12	52	3	158	57	22.8329	2	2	1	2	5	3	2	1	1	2	1	1
13	40	2	184	107	31.6044	4	1	1	1	5	4	2	2	2	1	2	3
14	42	2	160	50	19.5312	2	2	1	2	4	1	2	3	2	1	2	1
15	18	1	162	44	16.7657	1	2	1	1	3	1	2	1	1	1	2	2
16	42	2	168	80	28.3447	3	2	1	1	4	3	3	2	2	2	2	1
17	45	2	170	106	36.6782	4	2	1	1	6	1	2	1	1	1	2	2
18	49	2	175	82	26.7755	3	1	1	1	6	4	2	2	2	1	2	2
19	34	2	170	56	19.3772	2	2	1	1	6	1	1	2	2	2	2	2
20	49	2	180	90	27.7778	3	1	1	1	6	4	2	3	2	1	3	3
21	58	3	170	68	23.5294	2	2	1	1	5	1	2	2	2	1	3	2
22	44	2	182	72	21.7365	2	1	1	1	6	4	1	1	1	1	2	1
23	39	2	169	71	24.8591	2	2	1	2	4	1	2	2	2	1	2	2
24	58	3	179	89	27.7769	3	1	1	2	5	4	1	2	2	1	3	2
25	29	1	170	57	19.7232	2	2	1	1	4	1	2	3	2	1	3	3
26	41	2	166	60	21.7738	2	2	1	1	6	4	1	1	1	1	2	2
27	37	2	164	66	24.539	2	2	1	1	6	4	2	2	2	2	2	2
28	34	2	160	94	36.7187	4	2	1	2	5	1	2	2	5	2	4	2
29	61	4	190	80	22.1607	2	1	1	3	5	1	2	2	5	1	2	3
30	47	2	170	74	25.6055	3	2	1	2	6	2	1	2	2	1	2	2
31	48	2	175	80	26.1224	3	2	1	1	5	1	1	3	2	1	2	1
32	53	3	184	115	33.9674	4	1	1	2	6	2	3	2	2	1	2	3
33	52	3	185	115	33.6012	4	1	1	1	5	4	2	1	1	1	3	3
34	39	2	167	57	20.4382	2	2	1	1	6	4	1	1	1	1	3	2
35	57	3	176	115	37.1255	4	2	1	1	5	1	2	3	2	2	2	1
36	40	2	172	65	21.9713	2	2	1	2	1	1	1	1	1	1	3	2
37	30	2	183	90	26.8745	3	2	1	2	5	4	1	1	1	2	2	2
38	46	2	174	60	19.8177	2	2	1	1	5	1	2	3	2	2	4	2
39	21	1	160	45	17.5781	1	2	1	1	3	3	2	1	1	2	2	2
40	43	2	176	62	20.0155	2	2	1	1	3	1	1	2	2	1	2	2
41	47	2	169	60	21.0077	2	2	1	1	5	4	1	3	2	1	2	2
42	49	2	183	98	29.2633	3	1	1	2	7	2	2	2	2	1	3	2
43	55	3	186	110	31.7956	4	1	1	1	5	4	2	1	1	1	2	3
44	56	3	188	100	28.2933	3	1	1	1	6	4	1	3	2	1	2	3
45	58	3	173	63	21.0498	2	2	1	1	5	4	1	2	2	2	4	2
46	49	2	184	94	27.7647	3	1	1	1	4	4	2	2	2	1	2	2
47	37	2	170	56	19.3772	2	2	1	3	6	4	1	3	2	1	4	3
48	35	2	180	88	27.1605	3	1	1	1	5	4	1	2	5	2	1	2
49	34	2	200	109	27.25	3	1	1	1	5	4	2	1	1	2	2	2
50	61	4	166	71	25.7657	3	2	1	1	6	3	1	2	5	1	2	1
51	54	3	163	72	27.0993	3	2	1	1	5	1	2	2	2	1	2	1
52	48	2	163	55	20.7008	2	2	1	1	5	4	1	3	2	1	4	3
53	47	2	162	52	19.8141	2	2	1	2	6	4	2	1	1	1	2	2
54	36	2	161	87	33.5635	4	2	1	1	5	3	2	1	1	1	2	3
55	34	2	163	84	31.6158	4	2	1	1	5	4	2	2	2	2	2	3
56	46	2	165	82	30.1194	4	2	1	1	4	4	3	2	2	2	2	3
57	43	2	164	60	22.3081	2	2	1	1	4	4	2	3	2	2	2	2
58	38	2	170	68	23.5294	2	1	1	2	6	4	2	2	2	1	2	2
59	23	1	160	58	22.6562	2	2	1	1	5	4	1	2	2	2	2	2
60	56	3	164	55	20.4491	2	2	1	2	3	3	2	2	2	1	2	2
61	54	3	173	78	26.0617	3	2	1	1	5	4	2	2	2	2	2	2
62	33	2	165	70	25.7117	3	2	1	1	3	1	2	2	2	1	4	2
63	35	2	180	83	25.6173	3	1	1	1	7	4	1	3	5	1	2	3
64	37	2	165	55	20.202	2	2	1	1	5	4	2	1	1	1	4	2
65	47	2	157	50	20.2848	2	2	1	1	5	4	2	3	2	1	2	2
66	70	5	165	58	21.3039	2	2	1	1	2	1	2	3	2	2	2	2
67	36	2	176	90	29.0548	3	2	1	1	5	3	3	3	2	1	3	2
68	39	2	177	80	25.5354	3	1	1	1	6	2	1	2	5	1	3	2
69	66	4	170	82	28.3737	3	1	1	1	5	4	2	2	2	2	2	2
70	46	2	172	59	19.9432	2	2	1	2	5	4	2	2	2	1	3	2
71	57	3	175	83	27.102	3	1	1	1	5	4	2	2	5	1	2	2
72	40	2	165	67	24.6097	2	2	1	1	6	1	2	3	2	1	2	2
73	39	2	175	60	19.5918	2	2	1	1	4	2	2	2	2	2	4	2
74	40	2	170	90	31.1419	4	2	1	1	4	2	3	2	5	1	2	2
75	65	4	162	60	22.8624	2	2	1	2	5	1	2	2	5	2	2	2
76	56	3	176	78	25.1808	3	1	1	1	5	4	2	3	2	1	2	2
77	31	2	160	60	23.4375	2	2	1	1	5	4	1	2	2	2	2	2
78	48	2	171	55	18.8092	2	2	1	1	3	3	3	2	2	1	3	2
79	52	3	175	75	24.4898	2	2	1	1	6	1	1	2	2	1	3	3
80	43	2	165	70	25.7117	3	2	1	2	6	1	2	2	2	1	4	3
81	38	2	180	92	28.3951	3	1	1	1	6	4	1	3	2	1	2	2
82	40	2	185	76	22.206	2	1	1	1	3	1	1	1	1	1	1	1
83	62	4	172	67	22.6474	2	1	1	1	6	1	2	2	2	2	1	1
84	53	3	178	103	32.5085	4	1	1	3	5	2	3	2	2	1	2	3
85	40	2	167	109	39.0835	4	2	1	3	4	1	3	3	2	1	2	2
86	33	2	180	106	32.716	4	1	1	1	5	4	2	2	2	2	2	2
87	41	2	185	90	26.2966	3	1	1	2	6	4	2	3	5	1	2	2
88	48	2	160	63	24.6094	2	2	1	1	6	4	1	2	2	1	2	2
89	54	3	162	73	27.8159	3	2	1	1	4	1	1	2	2	1	1	1
90	48	2	174	82	27.0842	3	2	1	2	4	3	2	2	3	1	3	2
91	25	1	175	62	20.2449	2	1	1	1	6	4	1	3	2	1	1	1
92	32	2	166	65	23.5883	2	2	1	2	6	3	1	1	1	1	2	3
93	40	2	163	56	21.0772	2	2	1	1	5	2	2	2	2	2	1	1
94	41	2	172	89	30.0838	4	2	1	1	4	2	2	1	1	2	2	2
95	60	4	172	87	29.4078	3	1	1	1	5	4	1	2	2	1	2	2
96	50	3	169	80	28.0102	3	2	1	1	6	4	1	2	2	1	2	3
97	30	2	174	65	21.4692	2	2	1	1	6	4	1	2	2	1	2	2
98	26	1	166	54	19.5965	2	2	1	1	6	2	1	3	2	1	3	2
99	42	2	164	80	29.7442	3	2	1	1	5	4	2	3	5	3	2	2
100	33	2	181	92	28.0822	3	1	1	1	5	4	2	3	2	2	2	2
101	49	2	159	77	30.4577	4	2	1	3	5	1	3	2	2	1	2	2
102	38	2	177	99	31.6001	4	2	1	1	3	1	2	2	2	1	3	2
103	52	3	175	90	29.3878	3	1	1	1	4	4	3	3	2	1	2	3
104	50	3	195	99	26.0355	3	1	1	1	6	1	2	1	1	1	2	3
105	26	1	180	82	25.3086	3	1	1	1	6	4	1	3	2	2	3	2
106	57	3	156	69	28.3531	3	2	1	1	6	2	2	2	2	3	4	2
107	29	1	175	65	21.2245	2	2	1	1	6	4	1	3	5	2	3	2
108	26	1	168	58	20.5499	2	2	1	2	5	4	1	2	2	1	3	2
109	54	3	179	88	27.4648	3	1	1	1	5	1	2	3	5	1	3	3
110	45	2	162	54	20.5761	2	2	1	1	5	2	2	2	5	1	2	2
111	45	2	160	85	33.2031	4	2	1	1	4	4	2	2	3	2	3	3
112	52	3	163	82	30.863	4	1	1	1	3	4	2	3	5	1	2	1
113	47	2	174	63	20.8086	2	2	1	1	6	4	1	3	2	2	2	3
114	47	2	167	69	24.7409	2	2	1	2	5	1	2	3	2	2	2	1
115	27	1	180	70	21.6049	2	1	1	1	5	4	1	3	2	1	2	2
116	44	2	168	61	21.6128	2	2	1	1	5	3	2	2	3	1	3	2
117	39	2	160	55	21.4844	2	2	1	1	5	4	1	3	5	3	3	2
118	43	2	171	67	22.913	2	2	1	1	4	2	2	3	2	1	4	2
119	47	2	175	100	32.6531	4	1	1	1	4	4	2	3	2	2	3	3
120	38	2	175	85	27.7551	3	2	1	2	5	1	2	2	2	1	2	2
121	37	2	172	92	31.0979	4	1	1	1	3	4	2	1	1	2	2	2
122	35	2	172	90	30.4218	4	2	1	1	5	1	2	2	2	2	2	3
123	53	3	182	92	27.7744	3	1	1	1	5	1	2	2	2	1	2	2
124	28	1	183	69	20.6038	2	1	1	1	3	2	1	2	3	1	2	2
125	45	2	170	85	29.4118	3	2	1	1	5	1	1	2	2	1	2	3
126	45	2	168	70	24.8016	2	2	1	2	4	3	1	2	5	1	2	2
127	48	2	168	108	38.2653	4	2	1	1	3	1	1	3	2	1	2	3
128	59	3	179	92	28.7132	3	1	1	2	5	1	3	2	2	2	2	2
129	36	2	178	65	20.5151	2	2	1	1	5	4	2	3	5	1	2	2
130	46	2	164	60	22.3081	2	2	1	2	4	3	2	3	2	1	3	2
131	43	2	186	73	21.1007	2	1	1	1	5	4	2	3	2	1	2	2
132	35	2	166	78	28.306	3	2	1	1	5	3	2	3	5	1	3	2
133	50	3	168	70	24.8016	2	2	1	1	5	4	1	3	2	2	4	2
134	20	1	185	75	21.9138	2	1	1	1	3	4	1	3	2	3	2	3
135	65	4	160	76	29.6875	3	2	1	2	3	3	2	1	1	1	2	3
136	50	3	168	68	24.093	2	2	1	1	5	1	2	3	2	1	2	2
137	49	2	169	70	24.5089	2	1	1	1	6	4	1	2	2	2	2	1
138	55	3	165	75	27.5482	3	2	1	3	6	4	2	1	1	2	3	2
139	47	2	159	63	24.9199	2	2	1	1	6	1	2	3	2	1	2	1
140	42	2	165	55	20.202	2	2	1	1	6	4	1	2	2	1	2	2
141	43	2	163	79	29.7339	3	2	1	1	4	2	3	2	2	1	3	1
142	64	4	161	66	25.462	3	2	1	1	5	2	2	2	5	1	2	1
143	30	2	173	96	32.0759	4	2	1	1	4	3	2	3	2	1	3	2
144	42	2	169	73	25.5593	3	1	1	1	6	3	1	1	1	1	2	2
145	43	2	158	67	26.8386	3	2	1	1	6	1	2	3	2	1	2	1
146	44	2	163	59	22.2063	2	2	1	1	6	4	1	3	2	1	3	2
147	47	2	155	65	27.0552	3	2	1	1	5	1	1	3	2	1	2	2
148	39	2	177	65	20.7476	2	2	1	1	6	4	1	1	1	1	2	2
149	44	2	171	70	23.939	2	2	1	1	3	1	2	1	1	2	2	2
150	43	2	169	89	31.1614	4	2	1	1	6	1	2	2	2	1	4	2
151	31	2	158	50	20.0288	2	2	1	1	6	2	1	3	2	1	2	3
152	53	3	165	56	20.5693	2	2	1	1	5	1	1	2	2	1	2	3
153	42	2	169	65	22.7583	2	2	1	1	5	2	2	3	2	1	2	1
154	33	2	176	61	19.6927	2	2	1	1	6	4	2	3	2	1	2	2
155	59	3	163	84	31.6158	4	2	1	2	5	2	2	2	2	1	2	2
156	48	2	164	55	20.4491	2	2	1	1	5	4	2	2	2	2	1	1
157	50	3	170	106	36.6782	4	1	1	1	7	2	2	1	1	1	3	4
158	20	1	163	64	24.0882	2	2	1	3	3	2	1	3	2	2	3	2
159	30	2	170	62	21.4533	2	2	1	2	7	4	1	3	2	1	4	3
160	54	3	165	75	27.5482	3	2	1	1	5	4	2	1	1	1	2	1
161	19	1	161	55	21.2183	2	2	1	3	3	1	1	3	2	1	2	1
162	49	2	165	69	25.3444	3	2	1	2	5	1	1	1	1	1	2	3
163	48	2	159	53	20.9644	2	2	1	1	5	4	1	3	2	1	2	2
164	32	2	163	48	18.0662	1	2	1	1	6	3	1	2	2	1	2	3
165	43	2	175	85	27.7551	3	1	1	2	4	1	2	2	2	2	3	3
166	38	2	175	92	30.0408	4	1	1	2	5	4	2	1	1	2	2	2
167	23	1	158	56	22.4323	2	2	1	2	6	1	1	1	1	1	4	3
168	41	2	180	77	23.7654	2	1	1	1	6	4	1	2	5	1	1	2
169	43	2	157	55	22.3133	2	2	1	1	7	4	1	2	2	1	2	2
170	38	2	184	93	27.4693	3	2	1	1	4	4	2	2	2	1	1	2
171	53	3	170	68	23.5294	2	2	1	1	6	1	1	2	2	2	3	2
172	57	3	168	85	30.1162	4	2	1	2	6	1	2	2	2	2	2	2
173	45	2	172	112	37.8583	4	1	1	2	5	4	2	3	2	1	2	2
174	49	2	177	70	22.3435	2	2	1	1	5	4	1	1	1	1	2	2
175	48	2	165	66	24.2424	2	2	1	1	6	1	1	2	2	1	2	1
176	57	3	176	86	27.7634	3	1	1	2	5	4	1	1	1	1	1	1
177	35	2	173	78	26.0617	3	2	1	1	6	4	2	3	2	2	2	2
178	38	2	168	52	18.424	1	2	1	2	6	3	1	3	2	1	4	2
179	47	2	175	63	20.5714	2	2	1	1	6	4	2	1	1	2	2	2
180	39	2	182	69	20.8308	2	2	1	1	4	4	3	2	2	2	4	3
181	45	2	162	75	28.578	3	2	1	1	4	1	1	2	5	1	2	2
182	50	3	176	72	23.2438	2	1	1	2	5	3	2	3	2	1	2	2
183	39	2	187	130	37.1758	4	1	1	1	4	4	3	2	5	1	2	2
184	46	2	176	82	26.4721	3	1	1	1	6	4	1	2	2	2	2	2
185	54	3	190	105	29.0859	3	1	1	2	6	4	2	3	2	1	2	2
186	36	2	165	86	31.5886	4	2	1	1	4	2	2	1	1	2	2	1
187	48	2	175	68	22.2041	2	2	1	1	5	1	3	2	2	1	4	3
188	54	3	167	78	27.968	3	2	1	1	5	1	2	2	5	1	2	3
189	47	2	172	68	22.9854	2	1	1	1	6	4	3	3	5	2	2	2
190	52	3	173	77	25.7276	3	2	1	1	6	1	1	1	1	1	2	2
191	55	3	165	55	20.202	2	2	1	1	5	1	1	1	1	2	2	1
192	45	2	160	72	28.125	3	2	1	1	6	1	2	1	1	1	2	2
193	40	2	182	67	20.227	2	2	1	1	7	4	1	1	1	2	3	3
194	45	2	163	58	21.83	2	2	1	1	6	3	2	3	2	3	2	2
195	36	2	188	105	29.708	3	1	1	2	4	2	2	2	2	1	3	2
196	44	2	170	58	20.0692	2	2	1	2	5	4	3	3	2	1	4	2
197	29	1	151	79	34.6476	4	2	1	2	3	1	2	2	2	1	4	2
198	51	3	180	85	26.2346	3	1	1	1	7	4	2	3	2	1	2	2
199	53	3	167	51	18.2868	1	2	1	2	5	4	2	2	2	2	2	1
200	50	3	155	65	27.0552	3	2	1	1	6	1	2	3	2	1	3	2
201	43	2	168	92	32.5964	4	2	1	1	7	4	3	2	2	1	3	2
202	60	4	178	99	31.2461	4	1	1	1	3	3	2	2	2	3	2	2
203	39	2	165	65	23.8751	2	2	1	2	6	2	1	1	1	2	2	2
204	43	2	175	77	25.1429	3	1	1	1	6	4	2	1	1	1	2	2
205	37	2	165	67	24.6097	2	2	1	1	5	1	2	3	2	1	3	2
206	53	3	166	92	33.3866	4	2	1	1	6	1	2	2	2	1	2	1
207	57	3	171	68	23.255	2	2	1	1	6	3	3	3	2	1	4	4
208	35	2	167	63	22.5896	2	2	1	3	5	2	2	1	1	1	2	2
209	40	2	178	83	26.1962	3	2	1	1	6	1	2	3	2	1	2	1
210	27	1	179	67	20.9107	2	1	1	1	6	2	1	1	1	1	2	1
211	37	2	173	100	33.4124	4	1	1	1	5	1	2	3	2	1	3	2
212	30	2	162	54	20.5761	2	2	1	1	7	4	1	2	2	1	2	2
213	44	2	170	60	20.7612	2	2	1	1	5	4	1	3	2	1	1	1
214	36	2	173	76	25.3934	3	2	1	1	6	4	1	3	2	1	2	3
215	48	2	162	52	19.8141	2	2	1	1	5	1	2	2	2	1	3	3
216	39	2	164	58	21.5645	2	2	1	2	5	4	2	1	1	1	3	2
217	60	4	180	88	27.1605	3	1	1	1	5	4	2	2	2	1	2	3
218	44	2	158	67	26.8386	3	2	1	1	7	1	2	2	2	1	2	1
219	55	3	170	78	26.9896	3	1	1	1	7	3	1	2	2	2	2	2
220	35	2	160	58	22.6562	2	2	1	1	7	1	2	3	2	1	2	1
221	58	3	155	110	45.7856	4	2	1	1	5	1	4	1	1	1	4	5
222	49	2	168	66	23.3844	2	2	1	1	6	1	1	2	2	2	2	1
223	47	2	165	70	25.7117	3	2	1	1	6	1	2	2	2	1	2	2
224	19	1	168	66	23.3844	2	2	1	3	3	4	1	1	1	2	2	1
225	52	3	180	115	35.4938	4	1	1	1	4	1	2	3	2	1	3	2
226	41	2	178	69	21.7776	2	2	1	1	7	4	1	1	1	1	3	1
227	38	2	167	67	24.0238	2	2	1	3	6	4	2	3	2	1	3	3
228	47	2	160	57	22.2656	2	2	1	1	6	4	2	2	3	2	4	2
229	45	2	170	62	21.4533	2	2	1	2	6	4	1	1	1	1	2	2
230	23	1	155	49	20.3954	2	2	1	1	5	4	1	1	1	1	3	3
231	44	2	160	111	43.3594	4	2	1	2	5	4	2	2	2	2	3	2
232	45	2	171	73	24.9649	2	2	1	1	5	4	2	2	5	1	2	2
233	48	2	170	78	26.9896	3	2	1	1	5	4	3	2	2	2	4	2
234	38	2	160	57	22.2656	2	2	1	1	6	4	1	3	2	2	3	3
235	46	2	168	60	21.2585	2	2	1	1	4	3	2	3	2	1	2	2
236	42	2	164	98	36.4366	4	1	1	3	6	4	2	2	3	2	3	2
237	36	2	172	70	23.6614	2	2	1	1	5	1	1	2	2	3	3	3
238	49	2	185	100	29.2184	3	1	1	1	6	1	1	1	1	2	3	2
239	51	3	168	94	33.305	4	2	1	2	5	4	3	3	2	1	3	3
240	37	2	166	52	18.8707	2	2	1	1	4	1	2	3	2	1	4	1
241	37	2	165	62	22.7732	2	2	1	2	5	3	1	1	1	1	1	2
242	49	2	167	79	28.3266	3	2	1	2	5	4	3	2	2	1	3	3
243	33	2	181	84	25.6402	3	1	1	1	6	4	2	2	2	2	2	2
244	29	1	174	64	21.1389	2	2	1	1	6	3	1	1	1	2	2	2
245	45	2	167	70	25.0995	3	2	1	1	5	3	1	2	5	1	2	2
246	35	2	167	67	24.0238	2	2	1	1	6	2	2	2	2	1	2	2
247	37	2	165	56	20.5693	2	2	1	2	5	3	2	2	2	1	3	2
248	51	3	182	92	27.7744	3	1	1	1	5	1	2	3	2	1	2	2
249	46	2	165	60	22.0386	2	2	1	2	6	1	1	2	2	2	3	2
250	44	2	187	83	23.7353	2	1	1	2	3	4	2	1	1	2	2	1
251	54	3	168	85	30.1162	4	2	1	1	5	1	3	3	5	1	5	3
252	57	3	171	84	28.7268	3	2	1	2	5	1	2	2	2	1	2	1
253	36	2	158	67	26.8386	3	2	1	1	6	4	2	1	1	3	2	1
254	44	2	180	80	24.6914	2	1	1	1	3	4	2	1	1	1	2	1
255	48	2	162	66	25.1486	3	2	1	1	3	1	2	3	2	1	3	3
256	53	3	165	55	20.202	2	2	1	1	5	3	1	3	2	1	3	2
257	20	1	188	79	22.3517	2	1	1	1	3	4	1	1	1	3	2	2
258	56	3	167	67	24.0238	2	2	1	2	6	1	1	3	2	1	3	3
259	49	2	180	90	27.7778	3	1	1	1	6	4	2	3	2	1	3	3
260	50	3	160	70	27.3437	3	2	1	2	6	2	2	1	1	1	2	2
261	48	2	199	98	24.7468	2	1	1	1	4	1	2	2	2	2	3	1
262	43	2	190	115	31.856	4	1	1	1	6	2	2	3	2	1	3	2
263	38	2	160	54	21.0937	2	2	1	1	5	3	2	3	2	1	4	2
264	47	2	168	78	27.6361	3	2	1	2	5	4	1	1	1	2	3	3
265	41	2	168	68	24.093	2	2	1	1	6	1	1	1	1	1	2	2
266	33	2	187	91	26.023	3	1	1	2	2	4	1	1	1	2	1	2
267	40	2	171	93	31.8047	4	2	1	1	6	1	2	1	1	2	2	1
268	43	2	189	88	24.6354	2	1	1	2	6	4	1	1	1	2	2	2
269	19	1	160	43	16.7969	1	2	1	2	5	3	2	3	2	1	3	2
270	54	3	167	79	28.3266	3	2	1	1	5	3	1	1	1	1	2	2
271	39	2	167	85	30.478	4	1	1	1	3	1	2	3	5	2	4	2
272	45	2	166	93	33.7495	4	1	1	1	6	4	2	2	2	2	3	2
273	48	2	190	110	30.4709	4	1	1	1	5	4	2	1	1	1	2	2
274	46	2	163	52	19.5717	2	2	1	1	6	4	2	2	2	2	4	2
275	40	2	181	130	39.6813	4	1	1	1	6	1	2	3	2	2	1	1
276	50	3	168	80	28.3447	3	2	1	2	5	2	1	2	2	2	2	2
277	53	3	163	73	27.4756	3	2	1	1	6	1	2	3	5	2	2	3
278	33	2	184	81	23.9249	2	1	1	2	6	4	1	2	2	1	3	3
279	46	2	183	85	25.3815	3	1	1	2	6	2	2	2	5	1	2	2
280	41	2	150	70	31.1111	4	2	1	1	2	3	2	1	1	2	2	1
281	44	2	188	100	28.2933	3	1	1	1	4	1	1	3	2	2	3	2
282	54	3	160	81	31.6406	4	2	1	1	4	1	2	1	1	1	4	3
283	29	1	164	56	20.8209	2	2	1	1	6	3	1	2	2	1	3	2
284	39	2	163	80	30.1103	4	2	1	1	5	1	2	3	2	1	1	1
285	59	3	167	57	20.4382	2	2	1	1	4	1	2	2	2	1	3	2
286	64	4	155	64	26.6389	3	2	1	1	7	1	2	1	1	1	2	1
287	39	2	159	63	24.9199	2	2	1	1	6	2	1	2	2	2	4	3
288	50	3	168	54	19.1327	2	2	1	3	6	4	1	2	2	2	2	1
289	56	3	172	72	24.3375	2	2	1	3	5	1	1	2	2	2	2	1
290	44	2	175	60	19.5918	2	1	1	1	5	2	2	3	2	2	2	1
291	58	3	165	111	40.7713	4	2	1	1	6	3	3	2	3	1	2	2
292	55	3	161	74	28.5483	3	2	1	1	5	1	3	2	2	2	4	2
293	54	3	173	140	46.7774	4	1	1	1	6	3	3	2	2	1	2	2
294	54	3	158	77	30.8444	4	2	1	1	5	1	2	2	5	2	3	2
295	31	2	171	81	27.7008	3	2	1	2	5	1	2	2	2	2	2	2
296	43	2	177	82	26.1738	3	1	1	1	5	2	1	1	1	1	2	2
297	58	3	162	95	36.1988	4	2	1	1	6	1	2	2	2	1	2	2
298	52	3	187	110	31.4564	4	1	1	1	6	1	2	2	2	2	2	1
299	49	2	159	142	56.1687	4	1	1	1	5	1	2	1	1	1	2	3
300	37	2	165	56	20.5693	2	2	1	1	5	4	2	2	2	1	2	2
301	40	2	166	90	32.6608	4	2	1	1	4	1	2	2	2	1	2	2
302	31	2	172	84	28.3937	3	2	1	2	6	4	2	2	2	1	3	2
303	54	3	161	51	19.6752	2	2	1	1	5	1	1	3	2	1	2	2
304	47	2	181	111	33.8817	4	1	1	1	5	4	2	3	2	1	1	2
305	55	3	160	65	25.3906	3	2	1	1	6	4	1	3	2	1	3	2
306	49	2	175	72	23.5102	2	2	1	1	6	3	1	3	2	1	4	2
307	58	3	178	75	23.6713	2	1	1	1	5	1	2	2	2	2	2	3
308	58	3	152	106	45.8795	4	2	1	2	5	1	2	2	2	2	2	3
309	52	3	181	104	31.7451	4	1	1	2	6	3	3	2	2	1	2	2
310	53	3	154	51	21.5045	2	2	1	2	5	4	2	2	2	2	2	2
311	46	2	163	61	22.9591	2	2	1	1	6	2	1	1	1	2	1	1
312	55	3	167	80	28.6851	3	2	1	2	5	1	1	1	1	1	3	3
313	48	2	165	57	20.9366	2	2	1	1	4	4	2	2	2	1	3	3
314	55	3	152	47	20.3428	2	2	1	2	6	2	1	3	2	1	3	2
315	55	3	181	100	30.5241	4	1	1	2	6	2	2	3	2	1	3	3
316	62	4	165	65	23.8751	2	2	1	2	6	2	1	2	3	1	3	2
317	56	3	162	65	24.7676	2	2	1	1	5	1	2	2	2	1	2	2
318	45	2	177	66	21.0667	2	2	1	1	7	1	2	3	2	1	2	2
319	57	3	173	85	28.4005	3	1	1	1	6	1	1	3	2	1	2	1
320	38	2	169	70	24.5089	2	2	1	1	6	2	1	1	1	2	2	3
321	57	3	168	70	24.8016	2	2	1	1	6	1	2	3	2	3	3	2
322	36	2	182	84	25.3593	3	1	1	2	3	4	1	1	1	1	2	2
323	40	2	161	50	19.2894	2	2	1	1	5	3	1	1	1	1	2	2
324	47	2	160	96	37.5	4	2	1	2	3	1	3	1	1	1	4	3
325	54	3	180	97	29.9383	3	1	1	2	5	4	1	2	2	1	2	2
326	45	2	150	65	28.8889	3	2	1	1	6	1	2	2	2	1	3	2
327	42	2	151	51	22.3674	2	2	1	1	5	3	1	2	2	1	2	2
328	50	3	165	80	29.3848	3	2	1	1	6	1	2	1	1	1	2	2
329	46	2	160	63	24.6094	2	2	1	2	5	1	1	2	2	1	1	2
330	35	2	164	58	21.5645	2	2	1	1	5	4	1	2	2	1	2	2
331	42	2	172	88	29.7458	3	2	1	1	4	1	3	2	2	2	4	2
332	48	2	183	84	25.0829	3	1	1	1	5	3	1	2	2	1	2	2
333	56	3	155	49	20.3954	2	2	1	1	5	4	2	3	2	1	2	1
334	56	3	170	69	23.8754	2	2	1	1	6	1	1	2	2	2	3	1
335	37	2	157	54	21.9076	2	2	1	2	5	1	1	1	1	1	2	2
336	61	4	160	72	28.125	3	2	1	2	5	2	2	3	2	1	3	2
337	35	2	159	53	20.9644	2	2	1	1	5	3	1	2	2	2	3	2
338	43	2	168	85	30.1162	4	2	1	3	5	1	3	2	2	1	4	2
339	48	2	164	91	33.834	4	2	1	2	5	1	4	3	2	1	3	2
340	39	2	166	63	22.8625	2	2	1	3	5	1	1	3	2	1	2	2
341	45	2	175	50	16.3265	1	2	1	1	4	4	3	2	2	2	4	3
342	58	3	168	68	24.093	2	2	1	1	5	4	1	3	2	1	4	4
343	53	3	166	70	25.4028	3	2	1	1	6	1	2	2	2	1	2	3
344	46	2	145	53	25.2081	3	2	1	1	3	4	1	1	1	1	2	1
345	43	2	162	67	25.5296	3	2	1	2	5	4	1	3	2	1	4	2
346	44	2	184	108	31.8998	4	1	1	1	5	3	2	3	5	1	2	1
347	42	2	165	93	34.1598	4	2	1	3	6	2	3	2	5	1	4	2
348	31	2	163	58	21.83	2	2	1	3	6	2	1	1	1	2	3	2
349	44	2	156	54	22.1893	2	2	1	2	6	1	1	1	1	2	2	2
350	39	2	175	75	24.4898	2	2	1	2	6	1	2	2	2	2	2	2
351	34	2	168	53	18.7783	2	2	1	2	6	1	1	2	3	2	2	1
352	48	2	154	55	23.1911	2	2	1	1	6	4	1	2	2	1	3	2
353	33	2	157	60	24.3418	2	2	1	1	5	4	1	3	2	2	2	2
354	53	3	168	75	26.5731	3	2	1	1	6	4	1	3	2	1	1	1
355	39	2	165	58	21.3039	2	2	1	1	6	3	1	3	2	1	3	2
356	42	2	162	55	20.9572	2	2	1	1	5	3	1	2	2	1	2	2
357	38	2	165	62	22.7732	2	2	1	1	5	2	2	2	5	1	2	2
358	34	2	168	81	28.699	3	2	1	2	5	2	1	2	2	1	3	2
359	54	3	180	90	27.7778	3	1	1	1	5	4	2	2	2	2	2	2
360	64	4	173	91	30.4053	4	1	1	1	5	2	2	3	5	2	3	2
361	40	2	165	60	22.0386	2	2	1	1	6	1	1	3	5	2	4	2
362	49	2	160	54	21.0937	2	2	1	1	6	3	1	1	1	1	1	1
363	46	2	174	65	21.4692	2	2	1	1	4	4	2	2	3	3	3	2
364	44	2	175	82	26.7755	3	1	1	1	5	4	1	2	2	2	2	2
365	40	2	167	61	21.8724	2	2	1	2	6	2	2	3	2	1	2	1
366	33	2	167	90	32.2708	4	2	1	2	6	4	2	1	1	2	2	3
367	42	2	183	92	27.4717	3	1	1	2	5	4	2	3	2	1	2	2
368	40	2	175	80	26.1224	3	1	1	1	7	4	2	2	2	1	3	3
369	50	3	167	83	29.7608	3	2	1	1	6	4	2	3	2	1	3	3
370	39	2	170	64	22.1453	2	2	1	2	6	4	2	3	2	1	2	2
371	28	1	166	54	19.5965	2	2	1	1	4	1	2	3	2	1	1	1
372	42	2	174	67	22.1297	2	2	2	1	6	2	1	1	1	2	2	2
373	61	4	182	80	24.1517	2	1	1	3	5	1	1	2	2	1	2	2
374	49	2	170	70	24.2215	2	2	1	1	4	4	2	3	2	1	2	2
375	53	3	185	104	30.3871	4	1	1	2	6	3	2	2	3	2	2	2
376	46	2	168	71	25.1559	3	1	1	2	3	3	1	3	5	1	4	2
377	36	2	174	78	25.763	3	1	1	1	6	4	2	3	2	1	2	2
378	55	3	160	69	26.9531	3	2	1	1	6	4	3	2	2	1	3	3
379	48	2	162	75	28.578	3	2	1	2	4	3	1	3	2	1	3	2
380	48	2	160	70	27.3437	3	2	1	3	5	4	1	2	2	2	4	2
381	55	3	152	43	18.6115	2	2	1	2	3	1	2	1	1	1	3	3
382	41	2	180	77	23.7654	2	1	1	1	5	1	1	3	2	1	3	2
383	48	2	156	60	24.6548	2	2	1	1	6	1	2	3	2	1	2	2
384	52	3	176	102	32.9287	4	2	1	2	6	1	2	3	5	2	3	3
385	39	2	166	65	23.5883	2	2	1	1	6	4	1	2	2	1	2	3
386	48	2	159	86	34.0176	4	2	1	1	6	1	2	1	1	1	2	2
387	63	4	167	60	21.5139	2	2	1	1	7	1	2	2	5	1	2	2
388	53	3	160	74	28.9062	3	2	1	2	6	1	2	1	1	1	2	2
389	51	3	182	78	23.5479	2	1	1	1	7	4	1	3	2	2	1	1
390	36	2	159	79	31.2488	4	2	1	1	5	1	2	3	2	1	3	2
391	40	2	172	80	27.0416	3	2	1	2	6	1	3	3	2	1	4	2
392	53	3	163	77	28.9811	3	2	1	2	6	1	2	2	2	1	2	2
393	48	2	172	90	30.4218	4	2	1	1	5	4	2	2	2	1	4	3
394	20	1	172	70	23.6614	2	2	1	2	3	4	1	1	1	1	3	2
395	20	1	167	55	19.721	2	2	1	1	3	4	1	3	2	2	3	2
396	46	2	160	50	19.5312	2	2	1	1	5	2	1	3	2	1	3	2
397	54	3	163	84	31.6158	4	2	1	1	6	3	2	3	2	1	4	2
398	60	4	168	75	26.5731	3	2	1	1	6	1	1	3	2	1	2	3
399	65	4	180	92	28.3951	3	1	1	1	6	2	2	3	5	1	2	3
400	19	1	180	70	21.6049	2	1	1	2	3	4	1	3	2	1	2	1
401	21	1	162	45	17.1468	1	2	1	1	3	3	1	3	2	1	3	3
402	19	1	170	58	20.0692	2	1	1	1	3	2	1	1	1	2	5	2
403	47	2	181	85	25.9455	3	1	1	1	5	4	1	1	1	1	3	2
404	36	2	193	100	26.8464	3	1	1	1	4	4	1	2	2	2	2	2
405	45	2	160	62	24.2187	2	2	1	3	3	1	2	2	2	1	2	2
406	42	2	160	62	24.2187	2	2	1	1	4	1	3	2	2	1	4	2
407	45	2	171	132	45.1421	4	2	1	1	6	1	3	1	1	2	2	2
408	44	2	168	62	21.9671	2	2	1	1	5	1	1	2	2	2	3	3
409	62	4	157	87	35.2955	4	2	1	1	5	1	3	3	2	2	2	3
410	53	3	180	85	26.2346	3	1	1	1	5	4	2	1	1	2	2	3
411	56	3	180	118	36.4198	4	1	1	2	6	4	3	3	2	1	3	2
412	47	2	158	68	27.2392	3	2	1	2	5	2	3	3	2	1	2	1
413	41	2	179	80	24.968	2	1	1	2	4	1	2	3	2	1	3	4
414	21	1	180	73	22.5309	2	1	1	2	3	4	1	2	2	1	2	2
415	42	2	160	64	25	3	2	1	1	5	1	1	2	2	2	3	3
416	55	3	164	70	26.0262	3	2	1	1	5	2	2	2	2	1	2	1
417	48	2	158	77	30.8444	4	2	1	3	6	1	2	1	1	1	2	2
418	20	1	165	60	22.0386	2	2	1	1	3	4	1	3	2	3	3	2
419	57	3	172	74	25.0135	3	1	1	1	5	1	2	2	5	2	2	2
420	57	3	160	78	30.4687	4	2	1	2	5	1	2	1	1	1	2	2
421	50	3	169	88	30.8112	4	2	1	1	5	4	3	3	2	1	3	2
422	21	1	172	61	20.6193	2	1	1	1	3	4	1	2	2	1	2	2
423	19	1	175	73	23.8367	2	2	1	3	3	4	2	1	1	2	3	2
424	23	1	161	49	18.9036	2	2	1	1	5	2	1	2	2	1	3	2
425	52	3	162	63	24.0055	2	2	1	1	7	4	2	2	5	1	3	2
426	47	2	166	99	35.9268	4	2	1	2	5	1	3	3	2	1	3	2
427	45	2	168	54	19.1327	2	2	1	1	4	3	2	2	2	2	4	3
428	61	4	172	75	25.3515	3	1	1	1	7	2	2	2	2	1	2	3
429	42	2	166	57	20.6852	2	2	1	1	4	1	2	2	2	2	1	1
430	46	2	170	69	23.8754	2	2	1	1	6	1	2	2	2	1	2	2
431	18	1	166	51	18.5078	2	2	1	1	3	4	1	3	2	1	2	1
432	39	2	160	57	22.2656	2	2	1	1	6	1	1	3	2	2	2	2
433	21	1	184	86	25.4017	3	1	1	1	3	4	1	2	5	1	3	3
434	54	3	182	95	28.6801	3	1	1	2	5	2	1	2	5	1	2	1
435	45	2	165	62	22.7732	2	2	1	2	5	4	2	3	5	1	3	2
436	37	2	156	53	21.7784	2	2	1	2	6	3	1	3	2	2	2	2
437	34	2	173	65	21.7181	2	2	1	1	6	4	1	2	2	2	2	2
438	39	2	160	52	20.3125	2	2	1	1	6	4	1	3	5	1	3	2
439	54	3	186	98	28.327	3	1	1	1	3	4	3	3	2	1	2	2
440	44	2	163	58	21.83	2	2	1	2	3	1	2	3	5	1	3	3
441	60	4	157	83	33.6728	4	2	1	1	6	1	2	2	2	1	2	1
442	35	2	160	62	24.2187	2	2	1	1	5	1	1	2	2	1	4	1
443	54	3	162	74	28.1969	3	2	1	1	5	3	3	1	1	2	2	3
444	58	3	162	58	22.1003	2	2	1	2	5	1	2	3	2	1	2	1
445	39	2	152	65	28.1337	3	2	1	1	5	1	3	1	1	1	3	3
446	19	1	185	63	18.4076	1	1	1	2	3	1	2	1	1	1	3	2
447	53	3	169	86	30.111	4	2	1	2	5	2	2	1	1	1	2	2
448	51	3	171	68	23.255	2	2	1	2	5	4	1	1	1	1	2	1
449	42	2	163	72	27.0993	3	2	1	2	7	1	2	2	2	1	3	3
450	61	4	167	77	27.6095	3	1	1	1	5	1	2	2	2	1	2	2
451	43	2	179	63	19.6623	2	2	1	1	4	3	2	3	5	1	2	2
452	58	3	184	80	23.6295	2	1	1	1	3	1	2	2	3	2	2	1
453	45	2	170	70	24.2215	2	2	1	2	4	1	2	2	5	1	2	2
454	51	3	171	70	23.939	2	1	1	1	6	3	1	1	1	2	2	2
455	45	2	183	77	22.9926	2	1	1	1	5	2	2	1	1	1	2	1
456	53	3	166	59	21.4109	2	2	1	1	6	4	2	1	1	2	2	2
457	43	2	178	85	26.8274	3	1	1	1	6	2	2	2	5	1	2	3
458	44	2	174	76	25.1024	3	2	1	1	4	2	2	1	1	1	2	1
459	38	2	164	53	19.7055	2	2	1	2	5	2	1	1	1	1	4	2
460	47	2	169	53	18.5568	2	2	1	1	6	1	1	1	1	2	2	3
461	22	1	180	73	22.5309	2	1	1	2	5	4	1	2	2	2	2	2
462	29	1	173	61	20.3816	2	2	1	1	5	1	1	3	2	1	2	1
463	60	4	173	78	26.0617	3	1	1	1	5	4	1	3	2	1	2	2
464	43	2	158	78	31.245	4	2	1	1	5	2	2	2	2	1	2	2
465	49	2	166	80	29.0318	3	1	1	3	5	1	2	2	2	1	2	2
466	28	1	165	70	25.7117	3	2	1	2	6	2	1	2	2	1	2	2
467	53	3	163	59	22.2063	2	2	1	1	6	3	2	2	2	3	4	2
468	43	2	170	76	26.2976	3	1	1	2	4	3	2	1	1	1	2	2
469	58	3	177	72	22.9819	2	1	1	1	6	4	1	2	5	1	1	1
470	35	2	165	59	21.6713	2	2	1	1	5	4	2	3	5	1	2	1
471	55	3	170	93	32.1799	4	2	1	1	5	1	2	1	1	2	2	3
472	46	2	188	94	26.5957	3	1	1	3	7	4	1	2	2	1	2	2
473	45	2	180	83	25.6173	3	1	1	2	6	4	1	1	1	2	2	2
474	57	3	177	77	24.5779	2	1	1	1	6	4	1	3	2	1	2	2
475	54	3	180	85	26.2346	3	1	1	1	5	4	1	3	5	1	2	2
476	34	2	162	54	20.5761	2	2	1	1	7	1	1	2	2	2	2	2
477	46	2	180	78	24.0741	2	1	1	3	4	4	1	3	2	1	2	3
478	50	3	177	105	33.5153	4	1	1	1	5	4	2	2	2	2	2	3
479	51	3	160	78	30.4687	4	2	1	1	6	1	3	2	2	2	3	2
480	48	2	165	61	22.4059	2	2	1	1	5	3	2	3	2	2	3	2
481	43	2	160	80	31.25	4	2	1	1	4	4	2	2	2	2	4	3
482	39	2	181	127	38.7656	4	1	1	1	6	3	2	1	1	2	2	2
483	43	2	160	58	22.6562	2	2	1	2	6	1	1	2	2	1	2	2
484	61	4	161	52	20.061	2	2	1	1	6	1	2	2	5	1	2	2
485	61	4	176	80	25.8264	3	1	1	1	6	4	2	2	5	2	2	3
486	18	1	166	66	23.9512	2	2	1	3	3	1	1	1	1	1	2	3
487	49	2	169	75	26.2596	3	2	1	1	4	4	1	2	2	3	3	3
488	56	3	186	88	25.4365	3	1	1	3	5	4	1	3	2	1	2	2
489	51	3	170	68	23.5294	2	2	1	2	6	1	1	2	2	1	3	1
490	48	2	192	112	30.3819	4	1	1	1	6	3	2	1	1	1	1	3
491	47	2	168	65	23.03	2	2	1	1	6	1	1	3	5	1	2	2
492	45	2	180	95	29.321	3	1	1	1	5	4	1	2	5	2	2	2
493	58	3	180	85	26.2346	3	1	1	1	6	1	2	2	2	1	2	2
494	57	3	176	93	30.0232	4	1	1	2	6	4	2	2	2	1	3	2
495	39	2	172	67	22.6474	2	2	1	2	3	1	2	3	2	2	2	2
496	54	3	180	78	24.0741	2	1	1	1	5	4	2	3	2	2	1	2
497	65	4	190	100	27.7008	3	1	1	1	6	2	2	3	5	1	1	2
498	51	3	189	98	27.4348	3	1	1	1	3	4	1	3	2	1	2	2
499	38	2	170	59	20.4152	2	2	1	2	6	3	1	3	2	1	3	2
500	50	3	152	43	18.6115	2	2	1	3	5	2	1	1	1	1	3	2
501	51	3	168	71	25.1559	3	2	1	2	6	1	1	3	2	1	2	2
502	57	3	165	51	18.7328	2	2	1	1	6	2	1	1	1	1	1	3
503	44	2	158	55	22.0317	2	2	1	1	6	1	2	3	2	1	3	1
504	52	3	170	75	25.9516	3	1	1	2	5	2	2	3	2	1	2	2
505	52	3	169	80	28.0102	3	2	1	1	6	2	2	2	2	1	2	2
506	54	3	158	67	26.8386	3	2	1	1	5	3	2	2	2	1	2	1
507	39	2	161	64	24.6904	2	2	1	1	3	4	2	1	1	1	2	1
508	53	3	159	72	28.4799	3	2	1	1	3	1	3	2	2	2	3	2
509	44	2	167	64	22.9481	2	2	1	3	5	2	2	3	3	1	2	2
510	52	3	170	70	24.2215	2	2	1	1	5	1	2	2	2	1	2	2
511	59	3	184	105	31.0137	4	1	1	1	5	2	2	3	2	1	2	2
512	47	2	157	48	19.4734	2	2	1	1	7	4	2	1	1	1	2	2
513	46	2	170	98	33.91	4	2	1	1	6	3	3	2	2	2	2	3
514	52	3	164	71	26.398	3	2	1	1	6	4	2	2	2	1	2	2
515	47	2	170	90	31.1419	4	2	1	1	5	1	3	2	2	1	2	2
516	62	4	172	75	25.3515	3	1	1	1	5	1	2	3	2	1	2	3
517	39	2	170	57	19.7232	2	2	1	1	6	2	1	3	2	1	4	2
518	51	3	172	87	29.4078	3	1	1	2	5	3	2	2	2	1	2	2
519	45	2	182	105	31.6991	4	2	1	3	2	4	2	1	1	2	1	1
520	63	4	170	72	24.9135	2	1	1	1	6	4	1	3	5	1	2	3
521	58	3	163	68	25.5937	3	2	1	1	5	1	1	2	2	1	2	3
522	42	2	170	79	27.3356	3	2	1	1	6	2	2	1	1	2	3	2
523	54	3	172	95	32.112	4	1	1	1	2	1	2	2	2	1	2	1
524	52	3	158	60	24.0346	2	2	1	2	5	1	1	2	2	1	4	2
525	45	2	170	80	27.6817	3	2	1	1	6	1	1	1	1	1	1	2
526	52	3	163	98	36.8851	4	2	1	2	6	1	4	1	1	2	3	2
527	56	3	183	130	38.8187	4	1	1	1	5	1	2	3	2	1	2	2
528	61	4	168	75	26.5731	3	2	1	2	5	2	1	3	2	1	3	2
529	41	2	162	62	23.6244	2	2	1	2	4	1	3	2	2	3	4	2
530	36	2	167	70	25.0995	3	2	1	1	6	1	1	2	2	2	2	2
531	49	2	171	90	30.7787	4	2	1	1	4	4	4	3	2	2	3	2
532	50	3	165	85	31.2213	4	2	1	2	6	1	3	3	2	2	3	3
533	18	1	172	60	20.2812	2	1	1	2	2	2	1	1	1	1	3	3
534	45	2	174	74	24.4418	2	2	1	1	5	2	2	2	2	1	2	2
535	45	2	168	100	35.4308	4	2	1	1	3	1	2	1	1	1	5	3
536	47	2	157	60	24.3418	2	2	1	1	6	2	3	3	2	1	2	3
537	42	2	165	77	28.2828	3	2	1	1	3	4	2	2	2	1	2	2
538	38	2	165	49	17.9982	1	2	1	3	3	2	1	1	1	2	2	1
539	37	2	182	82	24.7555	2	1	1	1	5	2	2	3	5	2	2	2
540	53	3	180	83	25.6173	3	1	1	1	6	4	2	2	2	1	2	2
541	55	3	167	78	27.968	3	2	1	1	6	4	3	2	2	1	2	2
542	45	2	185	93	27.1731	3	1	1	1	6	4	2	3	2	1	2	2
543	47	2	167	140	50.199	4	2	1	1	4	1	2	3	2	2	2	1
544	44	2	163	61	22.9591	2	2	1	1	6	4	2	3	2	1	2	2
545	63	4	174	98	32.3689	4	1	1	1	5	1	2	3	5	2	2	1
546	64	4	166	78	28.306	3	1	1	2	5	2	1	3	2	1	2	2
547	64	4	173	77	25.7276	3	1	1	1	7	2	1	3	5	2	2	2
548	43	2	164	85	31.6032	4	2	1	1	6	1	2	2	5	1	3	2
549	50	3	172	74	25.0135	3	2	1	1	3	3	1	2	3	1	2	2
550	27	1	170	58	20.0692	2	2	1	2	3	4	1	1	1	1	3	1
551	46	2	173	65	21.7181	2	2	1	1	6	4	1	1	1	1	1	2
552	43	2	161	73	28.1625	3	2	1	2	3	1	2	1	1	1	2	1
553	68	4	175	80	26.1224	3	1	1	1	7	3	2	2	2	1	2	2
554	50	3	180	94	29.0123	3	1	1	3	4	1	1	2	3	2	3	2
555	53	3	180	76	23.4568	2	1	1	1	5	4	1	1	1	1	3	2
556	38	2	160	60	23.4375	2	2	1	1	5	2	2	1	1	2	4	3
557	56	3	180	84	25.9259	3	1	1	1	6	4	1	3	2	1	2	2
558	34	2	170	50	17.301	1	2	1	1	6	4	2	3	2	1	2	2
559	52	3	158	67	26.8386	3	2	1	1	6	2	1	1	1	2	2	1
560	31	2	170	81	28.0277	3	2	1	1	6	1	2	3	2	1	3	2
561	62	4	184	100	29.5369	3	1	1	3	5	4	1	1	1	1	2	3
562	53	3	170	70	24.2215	2	2	1	1	5	1	1	3	2	1	2	2
563	43	2	168	60	21.2585	2	2	1	1	6	1	1	1	1	2	2	2
564	44	2	173	64	21.3839	2	2	1	1	6	4	1	3	2	1	3	3
565	49	2	165	59	21.6713	2	2	1	1	6	4	1	2	2	1	2	2
566	52	3	165	65	23.8751	2	2	1	1	5	4	1	1	1	2	2	2
567	43	2	183	110	32.8466	4	1	1	2	6	1	2	1	1	3	3	2
568	56	3	157	47	19.0677	2	2	1	1	5	4	2	2	2	1	2	2
569	45	2	172	70	23.6614	2	1	1	2	5	4	1	2	2	2	1	1
570	34	2	188	90	25.464	3	1	1	1	5	4	2	3	2	3	3	2
571	45	2	168	80	28.3447	3	2	1	1	6	2	2	3	2	2	3	3
572	43	2	168	69	24.4473	2	2	1	1	6	2	3	3	2	1	3	1
573	57	3	163	61	22.9591	2	2	1	1	6	4	2	2	2	1	2	2
574	49	2	165	65	23.8751	2	2	1	1	6	4	1	1	1	2	2	2
575	53	3	168	54	19.1327	2	2	1	1	6	1	1	1	1	2	2	1
576	51	3	181	70	21.3669	2	2	1	1	6	4	1	3	2	1	3	2
577	50	3	170	80	27.6817	3	1	1	1	6	1	2	1	1	1	3	3
578	51	3	170	75	25.9516	3	1	1	1	7	4	1	1	1	1	3	2
579	34	2	163	66	24.841	2	2	1	1	3	2	1	3	2	1	2	2
580	57	3	160	56	21.875	2	2	1	1	6	3	1	2	2	1	2	2
581	55	3	170	80	27.6817	3	2	1	1	6	4	2	3	5	1	2	2
582	37	2	190	140	38.7812	4	1	1	1	6	1	2	2	2	1	3	2
583	58	3	170	80	27.6817	3	2	1	1	5	1	1	2	5	1	4	3
584	56	3	165	60	22.0386	2	2	1	1	6	2	1	3	2	1	2	3
585	55	3	160	68	26.5625	3	2	1	1	5	4	2	3	2	1	2	2
586	56	3	175	71	23.1837	2	2	1	1	6	2	1	3	5	1	2	2
587	55	3	180	85	26.2346	3	1	1	1	5	4	2	3	2	1	3	2
588	30	2	161	80	30.863	4	2	1	2	6	3	2	2	2	1	2	3
589	28	1	160	55	21.4844	2	2	1	2	5	1	2	3	2	3	3	3
590	38	2	160	80	31.25	4	2	1	2	5	1	2	3	2	1	4	1
591	40	2	170	64	22.1453	2	2	1	1	4	2	2	2	2	1	3	2
592	33	2	180	87	26.8519	3	1	1	1	6	4	1	2	5	1	3	2
593	34	2	165	75	27.5482	3	2	1	1	6	4	1	3	2	1	3	2
594	45	2	161	78	30.0914	4	2	1	2	6	3	2	3	2	1	3	2
595	63	4	163	75	28.2284	3	2	1	1	5	1	1	3	5	1	2	1
596	28	1	179	77	24.0317	2	1	1	2	6	4	1	3	2	1	3	3
597	41	2	165	78	28.6501	3	2	1	2	2	1	1	2	2	2	2	2
598	48	2	166	87	31.5721	4	2	1	2	5	1	2	3	2	1	2	3
599	48	2	158	53	21.2306	2	2	1	1	6	4	1	2	2	1	4	2
600	49	2	160	60	23.4375	2	2	1	1	5	4	2	1	1	1	2	2
601	48	2	162	64	24.3865	2	2	1	1	6	3	1	2	2	2	2	2
602	18	1	179	90	28.089	3	1	1	1	2	4	3	2	2	1	3	2
603	40	2	167	75	26.8923	3	2	1	1	6	2	2	3	2	1	2	3
604	54	3	163	52	19.5717	2	2	1	1	5	4	2	3	2	1	3	2
605	50	3	156	52	21.3675	2	2	1	1	6	2	2	1	1	1	2	3
606	57	3	189	93	26.0351	3	1	1	1	6	4	1	3	3	1	4	4
607	55	3	168	67	23.7387	2	2	1	2	5	4	2	2	2	2	2	2
608	58	3	187	110	31.4564	4	1	1	2	6	1	3	1	1	2	2	3
609	53	3	161	48	18.5178	2	2	1	1	5	4	1	3	5	1	2	1
610	55	3	162	64	24.3865	2	2	1	1	6	1	2	3	2	1	3	2
611	50	3	170	73	25.2595	3	1	1	1	3	1	1	1	1	2	2	2
612	51	3	169	94	32.912	4	2	1	1	5	1	2	2	2	1	3	2
613	57	3	177	68	21.7051	2	2	1	1	6	1	1	2	2	1	3	2
614	45	2	163	72	27.0993	3	2	1	1	6	2	2	3	2	1	4	2
615	45	2	186	67	19.3664	2	1	1	3	5	2	2	3	5	1	2	1
616	52	3	170	75	25.9516	3	1	1	2	5	1	1	3	2	1	3	3
617	37	2	162	68	25.9107	3	2	1	1	5	4	1	2	2	1	2	2
618	41	2	166	93	33.7495	4	2	1	1	3	1	2	3	2	1	1	1
619	52	3	165	70	25.7117	3	2	1	1	5	2	2	2	2	2	2	2
620	55	3	158	60	24.0346	2	2	1	1	6	4	1	3	2	1	3	2
621	39	2	175	85	27.7551	3	2	1	1	5	3	2	3	2	2	4	1
622	55	3	172	77	26.0276	3	2	1	2	5	3	2	2	2	2	2	3
623	58	3	174	100	33.0295	4	1	1	2	6	4	3	3	2	1	3	5
624	56	3	156	61	25.0657	3	2	1	1	5	2	1	2	2	3	2	3
625	39	2	161	70	27.0051	3	2	1	1	6	3	1	1	1	1	3	2
626	43	2	165	68	24.977	2	2	1	2	4	1	1	2	2	1	3	2
627	67	4	180	80	24.6914	2	1	1	1	5	1	2	3	3	1	2	4
628	56	3	167	53	19.0039	2	2	1	2	6	1	2	2	2	1	2	3
629	18	1	162	56	21.3382	2	2	1	3	3	4	1	3	2	1	2	1
630	39	2	157	47	19.0677	2	2	1	1	6	1	1	1	1	2	2	2
631	53	3	177	83	26.493	3	1	1	1	3	3	3	2	2	1	1	2
632	47	2	170	65	22.4913	2	2	1	1	5	3	1	3	2	1	2	2
633	58	3	183	75	22.3954	2	2	1	1	5	1	3	3	2	1	4	3
634	64	4	168	74	26.2188	3	2	1	1	5	4	2	3	5	1	1	1
635	53	3	172	70	23.6614	2	2	1	1	5	4	1	2	2	1	3	2
636	58	3	164	55	20.4491	2	2	1	1	5	1	1	2	2	1	3	2
637	46	2	162	65	24.7676	2	2	1	1	3	3	1	2	2	1	2	2
638	56	3	178	62	19.5682	2	2	1	1	5	3	3	3	2	1	3	2
639	60	4	160	65	25.3906	3	2	1	1	5	4	2	2	2	2	2	1
640	49	2	172	80	27.0416	3	2	1	1	5	1	3	2	2	1	2	1
641	57	3	165	56	20.5693	2	2	1	1	3	1	2	2	2	1	4	2
642	65	4	170	97	33.564	4	1	1	2	5	1	3	3	5	1	2	2
643	56	3	175	100	32.6531	4	1	1	1	5	1	2	2	2	1	2	1
644	57	3	163	68	25.5937	3	2	1	1	5	1	2	3	2	1	2	2
645	49	2	172	80	27.0416	3	1	1	2	6	2	1	2	2	2	2	2
646	56	3	160	58	22.6562	2	2	1	1	5	4	1	1	1	1	1	1
647	51	3	164	80	29.7442	3	2	1	2	5	1	1	1	1	1	2	1
648	43	2	180	81	25	3	1	1	2	5	1	1	3	2	1	2	2
649	48	2	160	65	25.3906	3	2	1	1	6	4	1	1	1	1	2	2
650	47	2	164	55	20.4491	2	2	1	1	3	2	2	3	2	1	3	1
651	55	3	165	75	27.5482	3	2	1	1	6	3	1	3	2	1	3	2
652	33	2	163	54	20.3244	2	2	1	1	6	4	1	1	1	1	2	2
653	56	3	153	87	37.1652	4	2	1	1	5	1	3	3	2	2	4	3
654	52	3	178	70	22.0932	2	1	1	1	6	2	2	2	2	1	2	2
655	48	2	173	80	26.7299	3	2	1	3	6	3	1	1	1	2	3	2
656	56	3	170	78	26.9896	3	2	1	1	5	2	1	2	2	1	2	2
657	51	3	167	79	28.3266	3	2	1	1	5	3	2	2	2	2	2	2
658	53	3	182	86	25.963	3	1	1	1	6	3	1	2	5	2	2	2
659	60	4	158	58	23.2335	2	2	1	1	6	1	2	3	2	1	2	2
660	57	3	176	75	24.2123	2	1	1	1	5	1	2	3	2	1	2	3
661	54	3	172	78	26.3656	3	1	1	1	4	4	1	3	2	1	2	2
662	18	1	176	69	22.2753	2	1	1	1	3	4	1	3	2	1	3	2
663	50	3	160	58	22.6562	2	2	1	2	5	2	1	1	1	1	2	2
664	59	3	170	74	25.6055	3	2	1	3	5	4	2	3	2	1	2	3
665	33	2	170	66	22.8374	2	2	1	1	7	3	1	2	2	2	3	2
666	41	2	165	79	29.0174	3	2	1	1	5	4	1	1	1	2	4	2
667	36	2	166	63	22.8625	2	2	1	1	6	1	1	3	2	1	3	2
668	62	4	185	100	29.2184	3	1	1	1	5	1	2	2	5	2	1	1
669	56	3	160	70	27.3437	3	2	1	1	5	3	2	2	2	1	2	2
670	40	2	172	68	22.9854	2	2	1	3	5	3	2	3	2	1	2	2
671	55	3	185	80	23.3747	2	1	1	1	6	4	1	1	1	1	2	2
672	44	2	192	100	27.1267	3	1	1	2	5	4	2	2	2	1	2	2
673	50	3	180	97	29.9383	3	1	1	3	5	4	2	2	2	1	5	2
674	49	2	158	49	19.6283	2	2	1	2	6	3	2	1	1	1	2	3
675	58	3	166	75	27.2173	3	2	1	1	5	3	3	2	2	2	3	3
676	50	3	172	70	23.6614	2	1	1	1	6	4	1	3	2	2	2	1
677	41	2	172	84	28.3937	3	2	1	3	4	3	2	1	1	1	1	1
678	48	2	175	80	26.1224	3	2	1	1	5	1	1	2	5	1	4	2
679	36	2	177	102	32.5577	4	1	1	1	3	1	2	3	2	1	3	3
680	62	4	157	48	19.4734	2	2	1	3	5	1	2	1	1	1	2	2
681	35	2	178	62	19.5682	2	2	1	1	6	1	1	1	1	2	2	2
682	58	3	180	90	27.7778	3	1	1	1	5	2	2	3	2	2	2	2
683	42	2	175	70	22.8571	2	2	1	1	3	2	2	2	2	2	3	2
684	54	3	167	67	24.0238	2	2	1	1	5	2	2	2	2	1	2	1
685	46	2	174	80	26.4236	3	1	1	1	6	2	1	3	2	1	2	2
686	58	3	180	111	34.2593	4	1	1	1	6	4	2	3	2	1	2	2
687	50	3	170	90	31.1419	4	2	1	1	2	1	2	1	1	1	3	2
688	58	3	158	61	24.4352	2	2	1	1	5	1	1	2	2	1	3	2
689	56	3	167	55	19.721	2	2	1	3	5	4	1	1	1	2	2	2
690	44	2	157	75	30.4272	4	2	1	1	5	3	2	2	2	1	2	2
691	40	2	163	63	23.7118	2	2	1	1	3	1	1	2	2	1	4	3
692	47	2	190	115	31.856	4	1	1	1	6	1	2	1	1	1	2	2
693	46	2	195	96	25.2465	3	1	1	2	5	4	2	2	2	2	3	2
694	64	4	167	74	26.5338	3	2	1	1	5	1	3	3	2	1	1	3
695	32	2	157	69	27.993	3	2	1	1	6	1	1	1	1	2	2	1
696	60	4	165	95	34.8944	4	2	1	1	5	1	3	2	2	2	3	2
697	33	2	166	59	21.4109	2	2	1	2	6	4	1	2	2	2	1	1
698	38	2	175	85	27.7551	3	1	1	1	6	1	2	3	2	1	2	2
699	54	3	176	90	29.0548	3	1	1	1	3	4	2	3	2	1	2	2
700	58	3	160	79	30.8594	4	2	1	1	5	3	3	1	1	1	2	2
701	67	4	172	110	37.1823	4	1	1	1	3	1	3	3	5	2	3	2
702	44	2	158	72	28.8415	3	2	1	1	5	4	2	2	2	1	2	2
703	55	3	172	60	20.2812	2	2	1	1	6	2	1	2	2	1	3	3
704	18	1	155	53	22.0604	2	2	1	1	3	4	1	3	2	1	2	2
705	62	4	172	83	28.0557	3	1	1	3	5	4	1	3	5	1	2	1
706	52	3	166	77	27.9431	3	2	1	1	6	2	2	2	2	1	4	2
707	50	3	184	70	20.6758	2	2	1	1	5	4	2	3	2	1	2	2
708	54	3	157	67	27.1816	3	2	1	2	6	1	1	1	1	2	3	2
709	38	2	174	88	29.0659	3	1	1	1	3	2	1	1	1	2	2	1
710	39	2	170	75	25.9516	3	2	1	1	3	4	1	1	1	2	2	2
711	57	3	161	57	21.9899	2	2	1	1	5	4	1	2	2	1	2	2
712	57	3	175	100	32.6531	4	1	1	2	3	1	2	2	2	2	3	3
713	50	3	168	62	21.9671	2	2	1	1	5	3	1	3	2	1	4	2
714	50	3	183	100	29.8606	3	1	1	1	7	1	1	2	2	1	2	3
715	53	3	183	95	28.3675	3	1	1	2	5	1	1	3	5	1	2	1
716	58	3	178	79	24.9337	2	1	1	2	5	1	2	3	2	1	2	2
717	47	2	193	106	28.4571	3	1	1	3	5	2	1	1	1	1	2	1
718	41	2	160	64	25	3	2	1	1	5	4	1	3	2	2	4	3
719	43	2	166	62	22.4996	2	2	1	2	5	4	2	3	2	1	2	3
720	45	2	172	80	27.0416	3	2	1	1	7	4	3	1	1	1	5	4
721	59	3	167	83	29.7608	3	2	1	1	7	4	1	2	5	1	2	2
722	40	2	167	53	19.0039	2	2	1	1	5	4	2	2	2	1	2	3
723	40	2	167	85	30.478	4	2	1	1	6	1	2	3	2	1	2	2
724	45	2	162	70	26.6728	3	2	1	1	5	1	2	3	2	1	2	3
725	52	3	154	54	22.7694	2	2	1	3	5	1	1	1	1	2	4	1
726	55	3	170	80	27.6817	3	2	1	1	6	1	2	2	2	2	4	3
727	48	2	178	105	33.1398	4	1	1	1	7	1	2	2	5	2	2	1
728	28	1	165	52	19.1001	2	2	1	1	6	3	1	3	2	3	4	1
729	43	2	150	80	35.5556	4	2	1	2	4	2	3	3	2	1	2	3
730	40	2	170	75	25.9516	3	2	1	2	4	2	2	1	1	1	1	2
731	54	3	166	80	29.0318	3	2	1	1	7	1	2	1	1	2	2	3
732	46	2	181	83	25.335	3	1	1	1	5	4	2	3	2	1	2	3
733	53	3	160	71	27.7344	3	2	1	1	6	1	2	3	2	1	3	3
734	53	3	158	76	30.4438	4	2	1	3	5	1	2	3	2	1	2	2
735	35	2	165	60	22.0386	2	2	1	2	4	1	2	1	1	1	4	1
736	42	2	165	69	25.3444	3	2	1	2	5	1	1	1	1	1	3	2
737	37	2	165	85	31.2213	4	2	1	1	4	2	3	2	2	1	3	2
738	43	2	177	75	23.9395	2	1	1	3	5	4	1	2	2	1	2	1
739	54	3	160	55	21.4844	2	2	1	2	5	3	2	2	3	2	3	2
740	47	2	175	85	27.7551	3	2	1	2	6	1	2	2	2	1	2	3
741	66	4	173	92	30.7394	4	1	1	1	5	4	2	3	2	1	2	2
742	47	2	160	68	26.5625	3	2	1	2	5	1	1	3	2	1	1	2
743	46	2	183	73	21.7982	2	1	1	1	6	4	1	1	1	1	2	2
744	54	3	170	87	30.1038	4	2	1	3	6	2	2	3	5	1	4	2
745	44	2	191	98	26.8633	3	1	1	2	4	4	2	1	1	2	2	2
746	42	2	160	63	24.6094	2	2	1	3	6	4	2	1	1	2	3	2
747	44	2	160	62	24.2187	2	2	1	2	4	1	1	2	2	1	2	2
748	55	3	163	67	25.2174	3	2	1	2	6	1	2	2	2	1	4	2
749	42	2	163	73	27.4756	3	2	1	1	2	4	2	1	1	2	3	2
750	58	3	177	99	31.6001	4	1	1	1	6	1	1	3	2	1	1	2
751	44	2	175	100	32.6531	4	1	1	1	5	2	2	3	2	1	3	2
752	43	2	173	65	21.7181	2	2	1	2	5	2	2	3	2	1	2	2
753	52	3	172	105	35.4922	4	1	1	2	5	1	3	3	5	1	2	1
754	45	2	151	63	27.6304	3	2	1	1	5	4	2	3	2	1	3	2
755	55	3	168	90	31.8878	4	2	1	1	5	1	2	2	2	1	2	1
756	44	2	158	54	21.6311	2	2	1	1	6	2	2	2	2	2	3	2
757	56	3	172	72	24.3375	2	2	1	1	5	3	2	2	2	2	4	3
758	47	2	167	61	21.8724	2	2	1	1	4	1	2	3	2	2	2	2
759	44	2	182	96	28.982	3	1	1	1	5	3	2	3	2	1	3	2
760	53	3	167	53	19.0039	2	2	1	1	6	1	1	2	2	1	3	2
761	43	2	166	98	35.5639	4	2	1	2	4	1	2	1	1	2	4	3
762	65	4	169	62	21.7079	2	2	1	1	6	1	2	2	5	1	2	2
763	47	2	176	80	25.8264	3	2	1	1	7	4	1	2	2	1	4	3
764	40	2	169	131	45.8667	4	1	1	2	6	2	3	1	1	1	4	5
765	62	4	165	59	21.6713	2	2	1	2	5	1	2	2	5	1	2	3
766	49	2	160	64	25	3	2	1	1	3	3	2	3	2	2	2	1
767	45	2	169	77	26.9598	3	2	1	1	5	4	2	3	3	1	4	2
768	54	3	157	49	19.8791	2	2	1	1	6	2	2	3	2	2	3	2
769	56	3	174	76	25.1024	3	2	1	2	6	1	2	3	2	1	2	2
770	56	3	186	93	26.8817	3	1	1	1	7	3	1	2	2	1	2	2
771	36	2	159	57	22.5466	2	2	1	1	5	3	1	1	1	1	1	1
772	48	2	176	52	16.7872	1	2	1	1	5	1	2	3	2	2	2	3
773	59	3	170	100	34.6021	4	1	1	2	6	2	2	2	2	1	3	3
774	50	3	179	101	31.5221	4	1	1	3	7	1	2	2	2	2	2	2
775	61	4	172	80	27.0416	3	1	1	1	5	4	3	2	2	1	2	4
776	50	3	162	50	19.052	2	2	1	3	5	4	2	3	2	2	2	2
777	53	3	158	111	44.464	4	2	1	2	5	1	2	3	2	1	3	3
778	56	3	170	62	21.4533	2	2	1	1	5	1	2	2	2	2	3	1
779	50	3	158	82	32.8473	4	2	1	1	6	1	2	2	2	1	4	2
780	56	3	166	80	29.0318	3	2	1	1	7	4	1	3	2	1	1	2
781	56	3	162	60	22.8624	2	2	1	2	5	4	2	2	2	1	2	2
782	49	2	164	58	21.5645	2	2	1	1	6	1	1	3	2	1	2	1
783	56	3	159	71	28.0843	3	2	1	2	4	1	1	2	2	1	2	3
784	53	3	170	90	31.1419	4	2	1	2	6	1	3	2	2	1	4	3
785	56	3	160	84	32.8125	4	2	1	2	5	1	2	3	2	1	3	4
786	57	3	158	60	24.0346	2	2	1	1	2	1	1	1	1	1	3	2
787	39	2	165	53	19.4674	2	2	1	1	5	2	1	2	2	2	2	1
788	42	2	169	65	22.7583	2	2	1	2	6	1	1	2	2	2	2	2
789	52	3	161	52	20.061	2	2	1	2	5	4	2	2	2	1	3	2
790	61	4	164	67	24.9108	2	2	1	2	5	1	1	1	1	1	2	2
791	51	3	171	79	27.0169	3	2	1	1	6	1	2	3	2	1	2	2
792	42	2	198	95	24.2322	2	1	1	1	4	4	2	1	1	2	1	2
793	58	3	164	60	22.3081	2	2	1	1	5	1	2	1	1	1	2	2
794	38	2	168	85	30.1162	4	2	1	2	5	4	2	2	2	1	2	1
795	47	2	180	160	49.3827	4	1	1	1	3	1	2	1	1	1	2	3
796	31	2	182	76	22.9441	2	2	1	1	3	1	3	1	1	2	5	5
797	40	2	170	74	25.6055	3	2	1	1	6	1	2	1	1	2	2	3
798	57	3	167	72	25.8166	3	2	1	2	5	4	2	3	2	1	3	2
799	51	3	183	83	24.7843	2	1	1	1	5	4	2	2	2	1	1	1
800	43	2	165	63	23.1405	2	2	1	2	5	2	2	3	2	1	2	2
801	58	3	170	85	29.4118	3	1	1	1	5	4	3	3	2	2	5	3
802	50	3	165	81	29.7521	3	2	1	1	3	1	2	2	2	2	2	1
803	55	3	160	90	35.1562	4	2	1	3	5	1	1	3	2	1	4	3
804	36	2	170	53	18.3391	1	2	1	1	3	4	2	2	3	3	2	2
805	59	3	173	68	22.7204	2	1	1	1	5	4	2	3	2	1	2	2
806	35	2	169	83	29.0606	3	2	1	1	5	2	2	3	2	1	4	3
807	48	2	172	58	19.6052	2	2	1	1	6	3	1	1	1	1	3	2
808	36	2	171	53	18.1252	1	2	1	1	4	2	2	1	1	1	2	3
809	46	2	175	88	28.7347	3	1	1	1	6	1	2	2	2	1	2	2
810	43	2	170	73	25.2595	3	2	1	1	6	4	2	1	1	2	2	2
811	50	3	172	82	27.7177	3	1	1	1	6	3	1	2	2	2	2	1
812	31	2	168	118	41.8084	4	2	1	1	5	1	2	1	1	2	3	1
813	45	2	162	91	34.6746	4	2	1	1	6	4	2	2	2	2	3	3
814	55	3	160	55	21.4844	2	2	1	1	6	4	1	3	2	1	3	3
815	18	1	171	62	21.2031	2	2	1	1	3	4	2	2	2	1	3	2
816	55	3	173	63	21.0498	2	2	1	1	6	4	1	2	2	1	2	2
817	54	3	157	63	25.5588	3	2	1	2	5	2	1	1	1	2	3	3
818	57	3	160	83	32.4219	4	2	1	3	6	1	2	1	1	2	2	1
819	42	2	177	73	23.3011	2	2	1	2	5	4	1	2	5	2	2	2
820	43	2	170	80	27.6817	3	2	1	3	4	1	1	1	1	2	2	3
821	21	1	163	55	20.7008	2	2	1	2	5	1	2	3	5	1	3	2
822	54	3	167	71	25.4581	3	1	1	1	6	1	1	2	2	1	2	2
823	46	2	160	55	21.4844	2	2	1	2	5	3	2	3	2	1	2	2
824	56	3	170	60	20.7612	2	1	1	1	6	4	3	2	2	1	3	5
825	56	3	154	57	24.0344	2	2	1	1	5	1	1	3	2	1	2	2
826	40	2	158	83	33.2479	4	2	1	1	6	2	3	2	2	1	2	2
827	55	3	167	90	32.2708	4	2	1	1	6	4	2	3	5	1	3	2
828	60	4	170	85	29.4118	3	2	1	1	6	3	1	3	2	1	1	1
829	58	3	160	98	38.2812	4	2	1	1	5	2	3	2	2	2	4	3
830	47	2	165	60	22.0386	2	2	1	1	5	1	2	1	1	1	2	3
831	62	4	190	100	27.7008	3	1	1	2	6	2	2	1	1	1	1	3
832	58	3	187	84	24.0213	2	1	1	1	5	1	2	3	2	1	2	2
833	49	2	167	70	25.0995	3	2	1	1	6	1	2	3	2	2	3	1
834	50	3	170	78	26.9896	3	1	1	1	6	2	2	1	1	1	2	2
835	31	2	176	85	27.4406	3	1	1	2	5	2	2	1	1	1	2	1
836	44	2	192	88	23.8715	2	1	1	1	6	1	2	2	2	1	2	2
837	50	3	167	52	18.6453	2	2	1	1	7	1	3	3	2	1	2	1
838	57	3	190	92	25.4848	3	1	1	1	6	4	1	3	3	1	4	4
839	50	3	170	62	21.4533	2	2	1	2	3	3	2	3	2	1	3	3
840	28	1	171	72	24.623	2	1	1	2	6	4	2	3	5	1	3	2
841	45	2	168	75	26.5731	3	2	1	2	6	2	2	3	5	2	3	2
842	48	2	167	70	25.0995	3	1	1	1	4	1	2	3	2	2	2	2
843	43	2	176	85	27.4406	3	1	1	1	5	4	1	1	1	2	2	2
844	52	3	167	90	32.2708	4	2	1	1	7	1	2	3	2	1	3	2
845	41	2	163	58	21.83	2	2	1	1	3	4	1	3	2	1	3	3
846	47	2	165	75	27.5482	3	2	1	3	6	1	2	3	2	1	2	2
847	53	3	178	80	25.2493	3	2	1	2	5	1	1	3	2	1	3	2
848	46	2	162	59	22.4813	2	2	1	1	7	1	1	2	2	1	2	2
849	44	2	190	95	26.3158	3	1	1	1	6	4	2	2	5	1	2	2
850	49	2	162	59	22.4813	2	2	1	2	6	4	2	3	2	1	3	2
851	54	3	170	73	25.2595	3	2	1	1	5	1	1	2	2	1	2	2
852	46	2	163	66	24.841	2	2	1	3	5	1	1	3	2	1	2	2
853	39	2	159	59	23.3377	2	2	1	1	5	3	1	1	1	2	3	2
854	54	3	169	90	31.5115	4	1	1	2	5	1	2	2	2	1	1	1
855	31	2	164	57	21.1927	2	1	1	1	6	3	2	2	2	3	3	1
856	55	3	170	112	38.7543	4	2	1	1	6	1	3	1	1	1	4	4
857	54	3	167	55	19.721	2	2	1	2	5	4	1	3	2	1	2	2
858	55	3	162	69	26.2917	3	2	1	1	4	4	2	2	2	1	2	2
859	51	3	167	85	30.478	4	2	1	2	6	1	2	3	2	1	3	2
860	21	1	173	67	22.3863	2	2	1	1	3	4	1	2	2	1	2	2
861	32	2	158	55	22.0317	2	2	1	1	3	3	2	2	2	1	4	2
862	34	2	172	58	19.6052	2	2	1	1	6	4	1	1	1	1	3	3
863	20	1	160	65	25.3906	3	2	1	2	3	2	1	3	2	1	2	2
864	47	2	184	82	24.2202	2	1	1	1	5	4	2	2	3	2	2	2
865	44	2	168	63	22.3214	2	2	1	2	4	2	1	2	2	2	2	2
866	45	2	168	63	22.3214	2	2	1	1	7	2	2	2	5	1	2	2
867	19	1	175	60	19.5918	2	1	1	1	3	4	1	3	5	2	3	2
868	46	2	165	73	26.8136	3	2	1	1	5	4	1	3	2	1	3	2
869	54	3	170	73	25.2595	3	2	1	1	5	4	2	2	2	2	3	3
870	39	2	165	54	19.8347	2	2	1	1	5	2	1	3	2	1	2	2
871	39	2	162	122	46.4868	4	2	1	1	6	4	3	1	1	1	2	2
872	49	2	165	58	21.3039	2	2	1	1	4	4	2	2	2	2	2	3
873	44	2	168	72	25.5102	3	2	1	2	3	4	2	2	2	2	2	1
874	58	3	165	59	21.6713	2	2	1	1	5	1	1	3	2	1	3	2
875	66	4	176	81	26.1493	3	1	1	2	5	2	2	1	1	1	2	2
876	51	3	179	73	22.7833	2	1	1	1	3	3	2	3	5	1	2	1
877	47	2	170	60	20.7612	2	2	1	2	5	4	2	3	2	2	4	2
878	35	2	172	85	28.7317	3	2	1	2	6	1	2	2	2	2	2	2
879	48	2	172	100	33.8021	4	1	1	1	5	2	3	1	1	1	1	2
880	42	2	173	81	27.0641	3	2	1	1	5	2	2	2	2	1	2	2
881	56	3	165	64	23.5078	2	2	1	1	5	1	1	2	2	2	2	1
882	44	2	167	103	36.9321	4	2	1	1	5	4	2	2	2	1	3	1
883	43	2	166	54	19.5965	2	2	1	2	6	4	1	2	2	1	2	2
884	34	2	176	83	26.7949	3	2	1	2	6	4	2	3	5	1	2	2
885	39	2	157	55	22.3133	2	2	1	1	6	1	1	2	3	2	2	1
886	43	2	183	86	25.6801	3	1	1	1	6	3	1	1	1	2	1	1
887	36	2	176	82	26.4721	3	2	1	2	6	3	2	3	2	1	3	2
888	57	3	172	87	29.4078	3	1	1	1	6	2	1	1	1	2	2	1
889	53	3	160	85	33.2031	4	2	1	1	5	1	3	3	2	2	3	2
890	48	2	160	55	21.4844	2	2	1	1	5	2	1	3	2	1	2	2
891	48	2	171	64	21.8871	2	1	1	1	4	3	2	2	5	1	2	2
892	50	3	175	87	28.4082	3	2	1	1	5	3	1	2	2	2	2	2
893	50	3	152	54	23.3726	2	2	1	1	5	2	2	3	2	1	2	2
894	53	3	180	70	21.6049	2	1	1	1	5	4	2	3	2	1	2	1
895	58	3	163	72	27.0993	3	2	1	1	5	4	2	3	2	2	4	3
896	43	2	170	90	31.1419	4	2	1	1	4	1	2	1	1	1	2	2
897	30	2	158	53	21.2306	2	2	1	1	6	1	1	2	2	1	2	2
898	42	2	168	62	21.9671	2	2	1	1	5	2	1	3	5	1	3	2
899	32	2	170	66	22.8374	2	2	1	1	5	4	2	3	5	1	2	3
900	60	4	180	88	27.1605	3	1	1	1	6	4	2	3	2	1	3	3
901	57	3	191	81	22.2033	2	1	1	1	6	4	1	2	4	1	2	4
902	58	3	160	57	22.2656	2	2	1	1	5	2	2	3	2	1	2	1
903	48	2	169	73	25.5593	3	1	1	2	6	1	1	2	2	1	2	2
904	38	2	165	61	22.4059	2	2	1	3	3	2	2	1	1	1	1	1
905	55	3	165	81	29.7521	3	2	1	3	5	1	1	1	1	1	3	2
906	45	2	173	67	22.3863	2	2	1	2	6	4	2	3	2	1	2	1
907	57	3	163	61	22.9591	2	2	1	1	7	3	2	3	2	1	2	1
908	20	1	158	56	22.4323	2	2	1	2	3	3	1	1	1	2	2	2
909	51	3	163	62	23.3355	2	2	1	2	6	2	1	3	2	2	2	3
910	50	3	186	120	34.6861	4	1	1	1	2	1	2	2	2	2	4	2
911	44	2	169	73	25.5593	3	2	1	1	5	1	2	3	2	2	4	3
912	58	3	180	90	27.7778	3	1	1	1	5	1	2	3	2	2	2	2
913	52	3	162	60	22.8624	2	2	1	1	5	3	2	3	2	1	3	3
914	32	2	153	71	30.3302	4	2	1	1	5	1	2	1	1	1	4	2
915	59	3	165	84	30.854	4	2	1	1	5	4	2	2	2	1	2	1
916	49	2	172	71	23.9995	2	2	1	2	5	2	2	3	3	1	2	1
917	19	1	163	45	16.937	1	2	1	1	3	4	1	2	2	2	3	3
918	46	2	171	76	25.9909	3	2	1	1	6	1	1	2	2	1	2	2
919	37	2	160	65	25.3906	3	2	1	1	5	2	2	2	2	1	2	2
920	36	2	166	77	27.9431	3	2	1	1	3	4	2	3	2	2	2	2
921	50	3	190	89	24.6537	2	1	1	1	5	4	2	3	5	1	2	2
922	54	3	165	60	22.0386	2	2	1	2	5	4	2	3	5	1	2	2
923	27	1	175	75	24.4898	2	2	1	1	5	2	2	3	2	1	2	2
924	34	2	166	62	22.4996	2	2	1	3	6	4	1	3	2	1	2	2
925	44	2	165	86	31.5886	4	2	1	3	6	2	2	2	3	2	3	3
926	33	2	181	87	26.556	3	1	1	2	6	1	1	2	5	1	2	3
927	33	2	173	59	19.7133	2	2	1	1	3	4	2	1	1	1	2	2
928	41	2	163	85	31.9922	4	2	1	1	5	4	3	2	2	2	4	3
929	43	2	160	90	35.1562	4	2	1	1	4	1	2	1	1	2	2	1
930	54	3	160	57	22.2656	2	2	1	1	5	4	2	1	1	1	2	2
931	47	2	175	96	31.3469	4	1	1	2	7	2	3	3	2	1	3	2
932	43	2	174	70	23.1206	2	2	1	1	6	3	2	2	2	1	2	1
933	45	2	170	51	17.6471	1	2	1	1	6	4	1	2	2	1	2	2
934	48	2	192	96	26.0417	3	1	1	2	5	2	2	2	5	1	2	1
935	60	4	170	80	27.6817	3	1	1	3	6	1	1	3	2	1	4	4
936	50	3	168	82	29.0533	3	2	1	2	5	4	2	3	2	1	2	2
937	51	3	168	61	21.6128	2	2	1	1	6	4	2	3	2	1	2	2
938	51	3	161	70	27.0051	3	2	1	1	6	2	2	3	2	1	2	1
939	38	2	165	65	23.8751	2	2	1	1	6	4	2	2	2	2	2	2
940	50	3	170	69	23.8754	2	2	1	1	5	2	2	2	2	1	4	3
941	49	2	167	60	21.5139	2	2	1	1	5	4	1	3	2	1	4	3
942	54	3	174	76	25.1024	3	2	5	1	6	1	1	2	2	1	3	2
943	52	3	163	59	22.2063	2	2	1	2	4	4	2	3	2	1	3	2
944	45	2	165	80	29.3848	3	2	1	2	5	1	2	2	5	1	3	2
945	55	3	160	56	21.875	2	2	1	1	5	4	2	2	2	2	2	2
946	40	2	174	84	27.7447	3	2	1	1	5	2	2	2	2	1	2	1
947	47	2	167	92	32.9879	4	2	1	1	3	1	3	3	2	1	3	2
948	54	3	184	85	25.1063	3	1	1	1	7	3	1	3	2	1	2	2
949	48	2	172	85	28.7317	3	1	1	1	6	4	1	3	2	1	2	1
950	45	2	165	80	29.3848	3	2	1	1	5	1	1	2	2	2	3	2
951	36	2	173	74	24.7252	2	2	1	1	6	1	2	1	1	1	2	1
952	25	1	168	80	28.3447	3	2	1	1	6	2	2	1	1	3	3	2
953	45	2	160	62	24.2187	2	2	1	2	4	1	1	1	1	1	1	1
954	45	2	175	86	28.0816	3	1	1	2	6	1	2	2	2	1	2	1
955	42	2	170	75	25.9516	3	2	1	1	5	1	1	2	2	1	2	2
956	28	1	164	57	21.1927	2	2	1	1	5	2	1	1	1	1	2	2
957	57	3	170	73	25.2595	3	2	1	2	5	2	2	2	5	2	2	1
958	41	2	156	57	23.4221	2	2	1	2	6	3	1	2	3	1	3	2
959	22	1	171	90	30.7787	4	2	1	2	5	4	2	3	2	1	2	3
960	28	1	167	63	22.5896	2	2	1	1	5	4	2	2	2	1	4	2
961	64	4	164	64	23.7954	2	2	1	1	5	4	1	1	1	1	2	2
962	36	2	172	76	25.6896	3	2	1	1	6	2	1	1	1	1	2	2
963	52	3	175	80	26.1224	3	2	1	2	5	2	1	2	2	2	3	2
964	46	2	165	65	23.8751	2	2	1	1	6	2	1	3	2	1	2	2
965	39	2	176	76	24.5351	2	1	1	1	6	4	2	2	2	1	3	2
966	42	2	165	51	18.7328	2	2	1	1	7	3	1	2	2	1	2	2
967	49	2	158	63	25.2363	3	2	1	1	5	2	2	3	2	1	2	1
968	43	2	176	70	22.5981	2	2	1	1	3	2	2	3	2	1	3	2
969	44	2	166	76	27.5802	3	2	1	1	6	1	1	2	2	1	3	4
970	58	3	159	46	18.1955	1	2	1	1	5	4	2	3	2	1	2	2
971	39	2	180	78	24.0741	2	1	1	1	6	4	2	2	5	2	2	1
972	42	2	162	67	25.5296	3	2	1	1	5	4	1	3	2	2	2	1
973	63	4	183	110	32.8466	4	1	1	1	5	2	2	3	5	2	2	1
974	34	2	165	62	22.7732	2	2	1	2	6	1	2	2	2	1	2	2
975	60	4	170	83	28.7197	3	1	1	1	5	2	3	2	2	1	1	2
976	47	2	163	82	30.863	4	1	1	1	6	3	3	2	2	1	3	2
977	44	2	164	57	21.1927	2	2	1	1	6	4	2	2	2	1	2	2
978	58	3	173	90	30.0712	4	1	1	2	5	4	2	2	2	1	2	2
979	45	2	166	88	31.935	4	2	1	1	6	1	2	3	2	1	2	3
980	49	2	163	53	19.9481	2	2	1	1	4	1	3	2	2	1	3	2
981	60	4	175	63	20.5714	2	2	1	1	5	1	2	3	2	1	2	3
982	40	2	175	67	21.8776	2	2	1	1	6	3	1	2	3	1	2	1
983	52	3	165	60	22.0386	2	2	1	1	6	1	1	2	2	2	2	2
984	44	2	167	54	19.3625	2	2	1	2	5	4	2	3	3	2	2	1
985	57	3	165	60	22.0386	2	2	1	1	5	1	1	2	2	1	3	2
986	45	2	168	80	28.3447	3	2	1	1	5	1	1	2	3	1	3	2
987	46	2	172	70	23.6614	2	1	1	1	6	4	1	2	5	2	2	2
988	44	2	158	76	30.4438	4	2	1	1	6	1	2	1	1	1	2	3
989	59	3	174	85	28.075	3	1	1	2	5	4	1	3	2	1	2	1
990	49	2	165	55	20.202	2	2	1	1	3	2	2	2	2	1	4	2
991	43	2	175	70	22.8571	2	2	1	3	3	1	2	2	2	1	2	2
992	50	3	163	68	25.5937	3	2	1	1	5	2	2	2	2	2	4	2
993	19	1	171	85	29.0688	3	1	1	2	3	4	1	3	2	1	2	2
994	48	2	190	120	33.241	4	1	1	1	6	1	2	2	2	2	3	2
995	48	2	165	87	31.9559	4	2	1	2	3	1	3	3	2	1	3	3
996	60	4	167	71	25.4581	3	2	1	1	5	3	1	2	2	1	3	2
997	42	2	179	84	26.2164	3	1	1	1	6	4	1	2	2	1	1	2
998	53	3	177	80	25.5354	3	2	1	2	5	1	2	2	2	3	4	2
999	40	2	167	72	25.8166	3	2	1	2	5	2	2	2	2	3	3	2
1000	49	2	164	74	27.5134	3	2	1	1	5	1	1	2	2	2	2	1
1001	37	2	160	60	23.4375	2	2	1	1	6	4	1	2	2	1	2	2
1002	50	3	172	70	23.6614	2	2	1	1	6	1	2	3	2	1	2	2
1003	56	3	161	59	22.7615	2	2	1	2	7	1	2	3	2	1	1	1
1004	45	2	184	90	26.5832	3	1	1	1	3	3	2	3	2	2	1	1
1005	48	2	170	80	27.6817	3	2	1	1	5	4	1	2	3	1	2	2
1006	56	3	160	70	27.3437	3	2	1	1	5	3	2	2	2	1	2	2
1007	45	2	172	85	28.7317	3	1	1	1	3	1	1	2	2	1	4	2
1008	50	3	185	97	28.3419	3	1	1	2	3	1	2	3	2	1	5	2
1009	56	3	163	88	33.1213	4	2	1	1	5	2	2	2	2	1	3	2
1010	51	3	185	89	26.0044	3	1	1	1	6	2	2	3	2	1	2	2
1011	42	2	165	73	26.8136	3	2	1	1	5	1	1	2	2	1	3	2
1012	48	2	170	64	22.1453	2	2	1	1	4	4	2	1	1	1	2	2
1013	30	2	171	67	22.913	2	1	1	1	6	4	1	2	2	1	3	2
1014	25	1	174	77	25.4327	3	1	1	1	3	4	2	3	2	4	4	2
1015	43	2	164	69	25.6544	3	2	1	2	4	4	2	1	1	1	2	2
1016	42	2	184	87	25.6971	3	1	1	3	6	4	1	3	5	1	3	2
1017	40	2	158	66	26.4381	3	2	1	1	6	1	1	3	2	1	2	1
1018	52	3	159	60	23.7332	2	2	1	1	5	1	1	1	1	1	3	1
1019	33	2	157	56	22.719	2	2	1	3	5	4	1	2	5	1	3	2
1020	50	3	156	63	25.8876	3	2	1	1	6	4	2	3	5	3	2	1
1021	38	2	183	105	31.3536	4	2	1	1	5	4	2	2	5	3	3	2
1022	45	2	171	56	19.1512	2	2	1	1	5	4	1	2	2	1	2	3
1023	55	3	160	77	30.0781	4	2	1	2	6	4	2	2	2	1	2	2
1024	44	2	160	71	27.7344	3	2	1	2	4	4	2	1	1	2	4	3
1025	27	1	151	43	18.8588	2	2	1	1	6	3	1	3	2	1	3	3
1026	52	3	173	62	20.7157	2	2	1	1	5	4	2	3	2	1	2	3
1027	46	2	165	58	21.3039	2	2	1	1	6	3	2	3	2	1	2	1
1028	54	3	178	100	31.5617	4	1	1	1	6	2	3	1	1	1	3	3
1029	49	2	161	77	29.7056	3	2	1	1	6	1	1	3	2	1	2	1
1030	47	2	180	90	27.7778	3	1	1	1	3	1	2	2	2	1	2	2
1031	36	2	162	58	22.1003	2	2	1	1	5	1	2	3	3	1	3	1
1032	54	3	184	92	27.1739	3	1	1	1	5	4	1	2	2	1	2	2
1033	53	3	175	84	27.4286	3	2	1	1	5	1	1	3	2	1	2	2
1034	33	2	163	56	21.0772	2	2	1	1	6	3	2	3	2	1	2	2
1035	53	3	165	76	27.9155	3	2	1	1	5	1	2	2	2	1	2	2
1036	45	2	174	64	21.1389	2	2	1	2	5	4	2	3	2	1	2	2
1037	49	2	178	97	30.6148	4	1	1	2	6	1	3	1	1	1	3	3
1038	50	3	160	60	23.4375	2	2	1	2	5	1	1	1	1	2	3	3
1039	23	1	162	58	22.1003	2	2	1	1	5	2	1	3	2	1	2	2
1040	35	2	163	82	30.863	4	2	1	2	5	2	2	3	2	1	3	2
1041	54	3	186	100	28.9051	3	1	1	2	6	4	1	3	2	1	2	1
1042	57	3	175	165	53.8776	4	2	1	3	6	2	2	1	1	2	2	2
1043	55	3	165	65	23.8751	2	2	1	3	6	4	1	3	2	1	3	3
1044	59	3	177	98	31.2809	4	1	1	1	5	3	2	2	5	2	2	3
1045	44	2	178	73	23.04	2	2	1	2	5	1	1	3	2	1	2	2
1046	50	3	164	68	25.2826	3	2	1	1	5	3	2	2	2	1	2	2
1047	47	2	190	110	30.4709	4	1	1	1	6	1	2	3	5	1	2	2
1048	56	3	186	86	24.8584	2	1	1	2	6	1	2	3	2	1	2	2
1049	39	2	160	60	23.4375	2	2	1	2	5	1	1	1	1	2	2	1
1050	45	2	160	56	21.875	2	2	1	1	4	2	2	3	2	1	2	2
1051	36	2	166	53	19.2336	2	2	1	1	5	1	1	1	1	1	2	2
1052	47	2	170	81	28.0277	3	2	1	2	3	4	2	2	2	2	2	1
1053	45	2	170	85	29.4118	3	2	1	2	6	4	3	3	2	2	3	3
1054	54	3	186	89	25.7255	3	1	1	1	5	3	2	3	3	2	3	2
1055	65	4	175	84	27.4286	3	1	1	1	5	3	2	3	5	1	2	3
1056	45	2	168	75	26.5731	3	2	1	2	5	4	1	3	2	1	2	2
1057	36	2	165	80	29.3848	3	2	1	1	3	2	2	3	2	2	5	2
1058	33	2	163	59	22.2063	2	2	1	2	6	4	2	1	1	2	2	1
1059	39	2	176	77	24.858	2	2	1	2	6	4	2	3	2	1	3	2
1060	47	2	165	72	26.4463	3	2	1	1	5	4	1	3	2	1	3	3
1061	20	1	172	71	23.9995	2	2	1	2	5	4	1	2	2	3	2	2
1062	33	2	175	77	25.1429	3	1	1	1	6	4	1	2	5	1	2	2
1063	52	3	160	62	24.2187	2	2	1	2	6	1	1	3	2	1	3	3
1064	45	2	170	60	20.7612	2	2	1	2	4	2	3	2	2	2	4	3
1065	50	3	182	114	34.4161	4	1	1	1	6	1	3	1	1	1	1	1
1066	49	2	184	100	29.5369	3	1	1	1	6	1	2	2	2	1	2	2
1067	44	2	172	74	25.0135	3	1	1	1	5	1	2	3	5	1	2	2
1068	28	1	165	74	27.1809	3	2	1	1	6	3	1	2	3	1	3	2
1069	39	2	158	57	22.8329	2	2	1	1	6	1	1	1	1	2	4	3
1070	56	3	152	58	25.1039	3	2	1	1	6	1	2	2	2	2	3	2
1071	37	2	170	63	21.7993	2	2	1	1	6	1	1	3	2	1	3	3
1072	43	2	166	67	24.3141	2	2	1	2	6	2	1	2	2	2	2	2
1073	44	2	177	67	21.3859	2	2	1	1	5	4	2	3	2	1	2	2
1074	55	3	165	76	27.9155	3	2	1	1	6	4	2	1	1	1	2	3
1075	55	3	170	69	23.8754	2	2	1	2	6	3	1	3	5	1	3	2
1076	34	2	168	70	24.8016	2	2	1	1	6	3	1	2	2	2	4	2
1077	42	2	172	68	22.9854	2	2	1	1	6	3	2	3	2	1	2	2
1078	55	3	170	92	31.8339	4	2	1	1	6	1	2	1	1	2	2	3
1079	47	2	165	90	33.0579	4	2	1	1	3	1	3	2	2	1	2	3
1080	55	3	171	68	23.255	2	1	1	1	3	4	2	1	1	2	2	1
1081	50	3	172	65	21.9713	2	1	1	1	6	2	1	1	1	2	2	2
1082	51	3	171	78	26.6749	3	2	1	1	6	3	2	2	2	1	2	2
1083	33	2	170	64	22.1453	2	2	1	1	6	4	1	3	2	1	1	2
1084	18	1	178	60	18.937	2	2	1	1	3	4	1	2	2	2	4	2
1085	37	2	167	65	23.3067	2	2	1	1	6	1	1	2	2	2	2	2
1086	51	3	175	87	28.4082	3	1	1	1	6	1	2	3	2	1	3	2
1087	50	3	172	75	25.3515	3	2	1	2	5	3	1	2	5	1	3	2
1088	46	2	168	122	43.2256	4	2	1	1	6	1	3	3	2	1	3	2
1089	45	2	166	66	23.9512	2	2	1	2	7	3	2	2	5	2	3	2
1090	48	2	186	100	28.9051	3	1	1	1	5	4	2	2	3	3	1	1
1091	42	2	168	70	24.8016	2	2	1	1	6	3	2	3	2	1	3	3
1092	32	2	169	69	24.1588	2	2	1	1	6	4	2	2	2	1	2	2
1093	34	2	180	75	23.1481	2	1	1	1	6	4	1	3	2	1	2	1
1094	53	3	155	75	31.2175	4	2	1	2	5	1	2	1	1	1	2	3
1095	53	3	183	95	28.3675	3	1	1	1	6	4	2	1	1	1	2	3
1096	58	3	165	70	25.7117	3	2	1	1	6	4	2	2	5	1	3	2
1097	26	1	166	51	18.5078	2	2	1	1	6	2	1	2	2	4	2	1
1098	57	3	163	68	25.5937	3	2	1	1	5	2	2	3	2	1	2	2
1099	46	2	161	74	28.5483	3	2	1	2	5	4	1	2	2	1	3	2
1100	53	3	160	58	22.6562	2	2	1	1	6	1	1	1	1	1	2	1
1101	28	1	170	75	25.9516	3	2	1	1	6	2	1	3	2	1	3	2
1102	32	2	170	66	22.8374	2	2	1	1	6	2	1	1	1	1	3	3
1103	43	2	175	64	20.898	2	2	1	1	5	1	1	3	2	1	2	2
1104	57	3	172	82	27.7177	3	2	1	2	6	3	1	2	2	2	3	1
1105	48	2	165	70	25.7117	3	2	1	1	5	3	1	2	2	1	3	3
1106	50	3	165	63	23.1405	2	2	1	1	4	1	2	3	2	1	2	1
1107	56	3	159	62	24.5243	2	2	1	2	6	2	2	3	3	1	2	2
1108	41	2	171	72	24.623	2	1	1	1	6	2	2	2	2	1	2	2
1109	25	1	169	72	25.2092	3	2	1	1	6	1	3	3	3	1	4	3
1110	47	2	164	74	27.5134	3	2	1	1	5	1	1	3	2	1	2	2
1111	41	2	168	72	25.5102	3	1	1	1	6	4	1	3	5	1	2	2
1112	51	3	165	90	33.0579	4	2	1	1	6	1	2	3	2	1	4	3
1113	36	2	181	88	26.8612	3	1	1	1	6	3	1	2	5	3	2	2
1114	44	2	178	73	23.04	2	1	1	3	1	1	4	1	1	2	2	1
1115	36	2	162	50	19.052	2	2	1	1	6	4	2	2	2	1	3	2
1116	53	3	162	70	26.6728	3	2	1	2	6	2	1	3	2	1	2	3
1117	38	2	164	61	22.68	2	2	1	1	4	4	1	1	1	2	2	2
1118	44	2	165	56	20.5693	2	2	1	1	5	2	1	1	1	1	2	2
1119	45	2	171	69	23.597	2	2	1	1	4	1	1	2	2	1	2	2
1120	54	3	183	120	35.8327	4	1	1	1	7	2	2	2	2	1	3	3
1121	44	2	170	57	19.7232	2	2	2	2	4	3	2	3	2	1	2	2
1122	49	2	162	60	22.8624	2	2	1	1	5	3	2	2	2	1	2	2
1123	45	2	180	65	20.0617	2	2	1	1	6	2	1	2	3	1	2	1
1124	41	2	167	59	21.1553	2	2	1	2	5	1	2	2	3	2	3	3
1125	51	3	183	82	24.4857	2	1	1	1	6	4	2	2	3	1	1	2
1126	55	3	171	89	30.4367	4	1	1	1	5	3	2	2	2	1	3	2
1127	50	3	165	80	29.3848	3	2	1	3	3	2	1	1	1	1	2	3
1128	42	2	167	64	22.9481	2	2	1	1	6	3	2	3	2	1	2	1
1129	40	2	175	90	29.3878	3	1	1	2	6	1	1	2	2	2	2	2
1130	31	2	154	94	39.6357	4	2	1	1	3	4	2	3	5	2	4	3
1131	40	2	162	60	22.8624	2	2	1	2	4	2	2	2	2	2	2	1
1132	34	2	163	75	28.2284	3	2	1	1	5	1	2	2	2	1	2	2
1133	58	3	175	80	26.1224	3	1	1	1	5	1	2	2	2	1	2	2
1134	57	3	168	70	24.8016	2	2	1	1	5	3	1	2	2	1	4	2
1135	21	1	173	62	20.7157	2	2	1	1	3	4	3	1	1	2	2	3
1136	52	3	187	101	28.8827	3	1	1	2	6	4	2	2	2	2	4	3
1137	55	3	159	74	29.271	3	2	1	1	4	3	1	3	2	1	3	2
1138	44	2	158	56	22.4323	2	2	1	1	6	3	2	2	2	1	4	2
1139	19	1	155	53	22.0604	2	2	1	1	3	4	1	3	2	1	2	2
1140	29	1	163	56	21.0772	2	2	1	1	6	4	2	3	2	3	4	4
1141	61	4	175	81	26.449	3	1	1	1	6	1	1	3	2	1	2	2
1142	53	3	169	66	23.1084	2	2	1	1	5	4	1	2	2	1	2	2
1143	40	2	181	71	21.6721	2	2	1	1	5	1	2	3	2	1	3	1
1144	59	3	165	99	36.3636	4	2	1	1	6	1	2	3	2	2	3	2
1145	52	3	175	98	32	4	2	1	1	3	4	3	3	2	1	3	2
1146	42	2	171	95	32.4886	4	2	1	1	6	3	2	2	2	1	2	2
1147	38	2	178	90	28.4055	3	2	1	1	3	1	1	2	2	1	5	3
1148	35	2	165	54	19.8347	2	2	1	1	6	4	2	2	2	3	3	2
1149	19	1	171	63	21.5451	2	1	1	2	3	4	2	3	2	1	1	1
1150	39	2	157	69	27.993	3	2	1	1	6	4	2	2	5	2	2	2
1151	51	3	170	80	27.6817	3	1	1	1	6	1	2	2	2	1	3	3
1152	45	2	167	66	23.6652	2	2	1	1	6	2	2	3	2	1	3	2
1153	25	1	174	60	19.8177	2	2	1	1	2	4	2	3	2	1	4	2
1154	45	2	161	64	24.6904	2	2	1	1	4	1	2	2	2	1	2	2
1155	47	2	170	115	39.7924	4	2	1	1	6	2	3	2	2	1	3	2
1156	43	2	167	58	20.7967	2	2	1	2	6	3	2	3	2	1	2	2
1157	29	1	164	49	18.2183	1	2	1	1	6	2	1	3	2	1	2	1
1158	44	2	163	48	18.0662	1	2	1	1	5	1	1	3	2	1	2	2
1159	52	3	185	84	24.5435	2	1	1	1	6	4	2	3	2	2	2	2
1160	60	4	162	59	22.4813	2	2	1	1	6	1	2	1	1	1	2	2
1161	49	2	171	80	27.3588	3	2	1	1	5	4	1	2	2	1	2	2
1162	47	2	191	133	36.4573	4	1	1	1	5	2	2	2	2	1	2	2
1163	43	2	170	72	24.9135	2	2	1	1	5	2	1	1	1	1	2	2
1164	38	2	169	63	22.0581	2	2	1	1	5	3	2	3	2	2	2	2
1165	38	2	162	58	22.1003	2	2	1	1	7	4	1	3	5	1	5	3
1166	29	1	168	52	18.424	1	2	1	2	5	3	1	3	2	1	2	1
1167	38	2	161	73	28.1625	3	2	1	2	6	2	1	1	1	1	2	2
1168	45	2	170	75	25.9516	3	2	1	1	5	1	2	2	2	1	2	3
1169	34	2	175	72	23.5102	2	1	1	1	6	4	1	3	2	3	2	2
1170	51	3	160	73	28.5156	3	2	1	2	6	1	4	3	5	1	4	2
1171	35	2	175	67	21.8776	2	2	1	1	6	2	2	3	2	1	2	2
1172	23	1	167	70	25.0995	3	2	1	1	3	4	1	2	5	1	3	2
1173	49	2	165	80	29.3848	3	1	1	1	6	1	1	3	3	1	2	2
1174	53	3	165	73	26.8136	3	2	1	1	5	3	1	3	2	1	3	3
1175	45	2	170	80	27.6817	3	2	1	1	5	1	2	2	2	1	1	3
1176	38	2	177	100	31.9193	4	2	1	3	4	2	2	3	2	1	3	2
1177	49	2	168	92	32.5964	4	2	1	1	5	1	2	2	2	1	2	2
1178	36	2	162	64	24.3865	2	2	1	1	5	3	2	3	2	1	2	1
1179	19	1	175	78	25.4694	3	1	1	2	3	4	2	1	1	1	3	2
1180	56	3	178	95	29.9836	3	1	1	1	5	2	2	2	2	2	2	2
1181	57	3	160	70	27.3437	3	2	1	1	5	1	2	2	2	1	2	3
1182	48	2	165	70	25.7117	3	2	1	2	6	2	1	1	1	2	2	2
1183	45	2	156	51	20.9566	2	2	1	2	6	2	2	2	2	1	2	2
1184	25	1	159	63	24.9199	2	2	1	1	3	1	2	3	2	1	1	1
1185	43	2	168	88	31.1791	4	2	1	1	5	1	2	3	2	1	3	2
1186	66	4	165	85	31.2213	4	2	1	1	5	1	2	2	2	1	4	2
1187	37	2	150	56	24.8889	2	2	1	2	7	1	1	2	2	2	3	2
1188	46	2	166	58	21.048	2	2	1	1	6	4	2	2	2	2	3	2
1189	50	3	158	87	34.8502	4	2	1	1	5	1	3	3	2	1	2	2
1190	57	3	177	76	24.2587	2	1	1	1	6	4	2	3	2	2	2	3
1191	47	2	180	85	26.2346	3	1	1	1	6	2	1	1	1	1	2	3
1192	57	3	164	75	27.8852	3	2	1	1	6	1	1	1	1	1	2	3
1193	47	2	165	76	27.9155	3	2	1	1	5	2	1	3	2	1	2	2
1194	48	2	175	69	22.5306	2	2	1	1	7	4	1	3	3	1	2	2
1195	41	2	174	65	21.4692	2	2	1	1	6	4	2	2	2	1	3	2
1196	40	2	168	70	24.8016	2	2	1	1	7	1	1	3	3	1	1	2
1197	44	2	186	86	24.8584	2	1	1	2	6	4	1	2	2	2	2	1
1198	40	2	168	70	24.8016	2	2	1	1	7	1	1	3	3	1	1	2
1199	41	2	172	79	26.7036	3	2	1	1	6	4	2	2	5	2	2	1
1200	49	2	169	62	21.7079	2	2	1	1	5	1	2	2	2	1	2	2
1201	20	1	170	65	22.4913	2	2	1	1	3	4	1	2	2	1	3	2
1202	47	2	170	72	24.9135	2	2	1	1	5	3	2	2	2	2	3	3
1203	30	2	171	65	22.2291	2	2	1	1	6	2	1	3	2	1	4	3
1204	53	3	162	70	26.6728	3	2	1	2	5	2	1	1	1	1	3	3
1205	55	3	160	56	21.875	2	2	1	1	6	4	1	2	2	1	2	2
1206	58	3	168	82	29.0533	3	1	1	1	6	2	2	3	2	1	2	2
1207	43	2	162	60	22.8624	2	2	1	1	6	3	1	1	1	2	2	1
1208	46	2	172	90	30.4218	4	2	1	1	5	1	3	3	2	1	2	2
1209	56	3	167	80	28.6851	3	2	1	1	5	1	3	3	5	1	4	3
1210	59	3	163	78	29.3575	3	2	1	2	5	2	2	2	2	1	2	2
1211	30	2	154	47	19.8178	2	2	1	1	5	3	1	1	1	2	3	2
1212	32	2	165	65	23.8751	2	2	1	2	6	4	2	3	2	1	3	3
1213	48	2	176	82	26.4721	3	2	1	2	5	1	1	2	5	1	2	2
1214	51	3	170	90	31.1419	4	2	1	1	5	1	2	2	2	1	3	2
1215	40	2	159	59	23.3377	2	2	1	1	5	2	2	2	3	1	3	2
1216	47	2	168	59	20.9042	2	2	1	1	6	3	1	3	2	1	3	2
1217	57	3	176	107	34.5429	4	1	1	1	5	3	2	2	3	2	2	2
1218	54	3	180	104	32.0988	4	1	1	1	5	1	2	2	2	1	2	2
1219	55	3	184	82	24.2202	2	1	1	1	6	3	1	1	1	1	2	2
1220	56	3	160	52	20.3125	2	2	1	1	5	1	1	3	5	1	4	2
1221	26	1	168	80	28.3447	3	2	1	2	6	4	3	1	1	1	2	2
1222	61	4	160	56	21.875	2	2	1	1	5	1	2	2	2	2	2	1
1223	34	2	178	59	18.6214	2	2	1	3	6	4	2	1	1	2	2	2
1224	43	2	167	68	24.3824	2	2	1	2	3	2	2	3	2	2	2	3
1225	31	2	170	75	25.9516	3	2	1	1	5	4	2	3	2	1	3	2
1226	44	2	160	50	19.5312	2	2	1	1	4	4	1	2	3	2	2	2
1227	40	2	166	62	22.4996	2	2	1	1	5	4	2	2	2	2	4	3
1228	43	2	175	72	23.5102	2	2	1	1	6	4	1	3	5	1	2	3
1229	47	2	162	62	23.6244	2	2	1	1	6	1	1	2	5	2	2	2
1230	52	3	163	60	22.5827	2	2	1	1	6	1	1	1	1	1	2	2
1231	57	3	175	91	29.7143	3	1	1	1	5	4	1	2	2	1	2	2
1232	19	1	172	88	29.7458	3	2	1	1	3	3	1	2	2	1	2	1
1233	49	2	178	90	28.4055	3	1	1	1	3	2	2	3	2	2	2	2
1234	48	2	161	65	25.0762	3	2	1	3	3	1	1	2	2	2	2	2
1235	44	2	174	90	29.7265	3	2	1	2	7	1	2	2	2	1	2	2
1236	44	2	161	58	22.3757	2	2	1	1	5	2	2	2	2	1	2	2
1237	31	2	175	62	20.2449	2	2	1	1	6	2	1	1	1	2	2	1
1238	21	1	186	98	28.327	3	1	1	1	3	4	1	1	1	3	2	2
1239	21	1	163	62	23.3355	2	2	1	1	5	4	2	1	1	2	4	2
1240	46	2	160	70	27.3437	3	2	1	2	5	3	1	3	2	1	2	2
1241	43	2	165	70	25.7117	3	2	1	3	6	4	2	1	1	2	3	2
1242	56	3	160	56	21.875	2	2	1	1	6	4	2	3	2	1	1	1
1243	55	3	174	86	28.4053	3	2	1	2	5	1	2	2	2	1	2	2
1244	45	2	164	130	48.3343	4	2	1	1	6	1	3	1	1	2	4	2
1245	56	3	163	77	28.9811	3	2	1	1	7	1	2	3	2	1	4	2
1246	46	2	175	52	16.9796	1	2	1	1	6	4	2	3	2	1	2	2
1247	50	3	165	72	26.4463	3	2	1	2	6	2	1	3	2	1	3	1
1248	52	3	168	65	23.03	2	2	1	3	6	4	1	3	2	1	2	1
1249	46	2	163	90	33.8741	4	2	1	1	5	1	2	2	2	1	2	2
1250	22	1	164	58	21.5645	2	2	1	1	4	4	1	2	2	1	2	2
1251	45	2	162	82	31.2452	4	2	1	1	5	2	1	3	2	1	4	3
1252	61	4	164	63	23.4236	2	2	1	1	5	2	2	3	2	2	2	3
1253	37	2	162	57	21.7193	2	2	1	1	4	4	2	2	2	2	2	2
1254	42	2	167	77	27.6095	3	2	1	1	5	3	2	2	2	1	3	2
1255	40	2	174	87	28.7356	3	2	1	1	5	1	2	2	2	1	2	3
1256	40	2	187	93	26.595	3	1	1	1	6	1	1	3	2	1	2	2
1257	40	2	167	60	21.5139	2	2	1	1	7	3	3	2	2	1	2	2
1258	37	2	166	51	18.5078	2	2	1	2	6	3	2	1	1	2	2	2
1259	55	3	168	75	26.5731	3	2	1	1	7	3	2	3	2	1	2	2
1260	41	2	176	64	20.6612	2	2	1	1	6	4	2	3	2	1	2	2
1261	21	1	154	52	21.9261	2	2	1	2	3	3	1	2	2	1	3	1
1262	41	2	170	53	18.3391	1	2	1	1	5	4	2	1	1	1	2	2
1263	40	2	155	70	29.1363	3	2	1	3	6	2	1	3	2	1	4	1
1264	46	2	170	90	31.1419	4	2	1	1	6	1	2	2	2	1	4	2
1265	49	2	176	60	19.3698	2	2	1	1	6	4	2	2	2	3	4	3
1266	32	2	174	59	19.4874	2	2	1	1	7	1	2	3	5	1	5	2
1267	45	2	173	64	21.3839	2	2	1	1	6	4	2	2	2	1	2	2
1268	47	2	157	50	20.2848	2	2	1	2	5	4	1	1	1	1	1	1
1269	53	3	152	57	24.6711	2	2	1	2	5	1	3	2	2	1	2	3
1270	33	2	188	86	24.3323	2	1	1	1	6	2	2	2	2	1	2	2
1271	30	2	181	70	21.3669	2	2	1	1	6	1	2	2	2	1	2	1
1272	43	2	165	69	25.3444	3	2	1	2	3	4	2	2	2	1	2	2
1273	36	2	167	60	21.5139	2	2	1	3	5	1	1	1	1	1	2	3
1274	35	2	162	51	19.433	2	2	1	1	5	1	1	3	2	1	2	2
1275	33	2	170	65	22.4913	2	2	1	1	7	2	1	3	2	1	2	2
1276	49	2	167	66	23.6652	2	2	1	1	6	2	1	1	1	2	4	2
1277	46	2	162	80	30.4832	4	2	1	1	6	4	2	3	2	1	3	2
1278	34	2	175	98	32	4	1	1	1	5	2	2	2	5	1	3	2
1279	67	4	172	94	31.7739	4	2	1	2	5	1	2	3	5	1	2	2
1280	48	2	165	87	31.9559	4	2	1	1	3	1	2	2	2	1	4	2
1281	26	1	166	53	19.2336	2	2	1	2	6	1	1	3	3	1	3	2
1282	47	2	175	90	29.3878	3	1	1	1	6	4	1	2	2	2	3	2
1283	56	3	180	142	43.8272	4	1	1	1	5	4	3	2	2	1	2	5
1284	53	3	162	91	34.6746	4	2	1	1	5	1	3	2	2	2	3	3
1285	52	3	162	53	20.1951	2	2	1	1	6	4	2	3	2	2	2	2
1286	49	2	172	58	19.6052	2	2	1	3	5	3	2	1	1	2	4	2
1287	56	3	183	85	25.3815	3	1	1	2	5	2	2	2	3	2	2	2
1288	45	2	162	76	28.959	3	2	1	1	5	1	2	2	5	1	3	2
1289	59	3	183	78	23.2912	2	1	1	1	6	4	1	3	2	1	2	2
1290	33	2	183	92	27.4717	3	1	1	1	6	4	1	1	1	1	2	2
1291	23	1	174	61	20.148	2	2	1	1	5	4	1	2	2	2	3	2
1292	50	3	162	93	35.4367	4	2	1	2	6	1	2	1	1	1	3	3
1293	39	2	165	72	26.4463	3	2	1	2	6	4	2	3	2	1	2	1
1294	28	1	160	75	29.2969	3	1	1	3	3	1	1	1	1	1	2	1
1295	53	3	165	68	24.977	2	2	1	3	5	1	1	3	5	1	3	2
1296	48	2	178	75	23.6713	2	2	1	1	5	3	1	2	2	2	2	3
1297	20	1	175	70	22.8571	2	1	1	1	3	4	2	3	3	1	4	2
1298	59	3	153	58	24.7768	2	2	1	2	5	4	1	2	2	1	2	2
1299	34	2	163	88	33.1213	4	2	1	2	5	1	2	1	1	1	3	3
1300	39	2	164	82	30.4878	4	2	1	2	6	1	2	1	1	1	2	1
1301	26	1	164	67	24.9108	2	2	1	3	5	1	3	1	1	1	2	2
1302	19	1	174	60	19.8177	2	2	1	1	3	4	1	2	2	2	4	3
1303	44	2	173	67	22.3863	2	2	1	1	3	1	1	3	5	2	3	3
1304	49	2	159	56	22.151	2	2	1	1	5	4	1	2	2	1	3	2
1305	48	2	160	56	21.875	2	2	1	1	3	4	1	1	1	1	2	2
1306	41	2	165	66	24.2424	2	2	1	1	6	1	2	2	5	1	2	1
1307	54	3	167	75	26.8923	3	2	1	1	3	1	2	3	2	1	3	2
1308	47	2	164	63	23.4236	2	2	1	2	5	1	2	2	2	1	2	2
1309	39	2	165	68	24.977	2	2	1	2	4	1	2	2	2	1	2	2
1310	44	2	169	94	32.912	4	2	1	1	6	1	3	3	2	1	3	2
1311	45	2	164	58	21.5645	2	2	1	1	5	3	1	3	2	2	3	2
1312	47	2	170	75	25.9516	3	2	1	1	2	4	1	3	2	1	2	1
1313	46	2	155	54	22.4766	2	2	1	1	2	4	2	3	2	1	2	3
1314	35	2	170	85	29.4118	3	1	1	1	1	4	1	3	5	1	5	3
1315	46	2	185	120	35.0621	4	1	1	3	3	3	2	3	2	1	2	1
1316	50	3	169	64	22.4082	2	2	1	2	5	4	1	1	1	1	2	1
1317	57	3	165	82	30.1194	4	2	1	2	5	1	2	2	2	1	2	2
1318	55	3	165	70	25.7117	3	2	1	2	5	4	1	3	2	1	3	2
1319	42	2	165	85	31.2213	4	2	1	1	2	1	2	3	2	1	4	2
1320	30	2	175	100	32.6531	4	1	1	3	2	1	2	2	2	1	2	3
1321	43	2	171	68	23.255	2	1	1	2	2	4	2	2	2	1	2	2
1322	52	3	184	100	29.5369	3	1	1	1	3	1	1	2	2	1	2	1
1323	18	1	171	62	21.2031	2	2	1	1	3	4	2	2	2	1	3	2
1324	20	1	172	61	20.6193	2	2	1	1	3	4	1	3	2	1	3	2
1325	42	2	158	90	36.0519	4	2	1	1	6	4	3	3	2	1	2	1
1326	49	2	167	51	18.2868	1	2	1	3	6	2	1	3	2	1	3	2
1327	46	2	175	85	27.7551	3	1	1	1	6	4	1	2	2	1	2	2
1328	59	3	169	60	21.0077	2	2	1	2	5	3	2	3	2	1	2	3
1329	51	3	175	108	35.2653	4	1	1	2	3	1	2	2	2	2	2	2
1330	66	4	167	71	25.4581	3	1	1	1	5	1	2	3	2	1	1	2
1331	45	2	163	85	31.9922	4	2	1	1	3	1	2	1	1	1	1	3
1332	57	3	159	97	38.3687	4	2	1	1	5	2	3	2	2	2	4	3
1333	52	3	178	80	25.2493	3	2	1	2	5	3	1	2	2	1	2	1
1334	51	3	174	85	28.075	3	2	1	1	6	4	2	2	2	3	2	3
1335	38	2	181	88	26.8612	3	2	1	2	5	4	1	1	1	1	2	2
1336	61	4	156	50	20.5457	2	2	1	1	6	2	1	2	2	1	3	2
1337	39	2	159	67	26.5021	3	2	1	1	6	4	1	1	1	1	3	3
1338	49	2	168	70	24.8016	2	2	1	1	6	2	1	2	2	1	3	2
1339	18	1	163	48	18.0662	1	2	1	2	3	4	1	2	2	1	3	2
1340	22	1	160	55	21.4844	2	2	1	2	3	2	1	1	1	1	4	3
1341	49	2	164	65	24.1672	2	2	1	2	5	2	2	2	2	1	2	2
1342	41	2	173	78	26.0617	3	1	1	1	6	2	1	3	2	1	2	2
1343	55	3	182	120	36.2275	4	1	1	2	5	4	3	2	2	2	2	2
1344	53	3	180	73	22.5309	2	2	1	2	5	1	2	2	3	1	3	2
1345	57	3	157	48	19.4734	2	2	1	1	5	1	2	3	5	1	3	2
1346	54	3	182	98	29.5858	3	1	1	1	5	1	2	3	2	1	2	3
1347	47	2	172	75	25.3515	3	2	1	1	6	4	3	3	2	1	2	1
1348	37	2	175	86	28.0816	3	2	1	1	5	4	2	3	5	2	2	2
1349	22	1	168	55	19.487	2	2	1	1	3	4	2	3	2	2	2	2
1350	59	3	166	52	18.8707	2	2	1	2	5	2	2	1	1	1	3	2
1351	50	3	185	85	24.8356	2	1	1	1	7	4	1	2	2	1	2	2
1352	51	3	169	57	19.9573	2	2	1	1	5	4	1	2	5	1	3	2
1353	43	2	162	62	23.6244	2	2	1	2	5	1	1	1	1	1	2	2
1354	43	2	187	88	25.1651	3	1	1	1	6	4	1	2	2	2	2	1
1355	53	3	163	70	26.3465	3	2	1	1	3	4	2	2	2	1	2	2
1356	58	3	169	78	27.31	3	2	1	2	5	1	2	3	2	1	2	2
1357	57	3	175	60	19.5918	2	2	1	1	5	4	1	2	2	1	3	2
1358	50	3	177	79	25.2163	3	2	1	2	4	2	2	3	2	1	3	2
1359	41	2	168	50	17.7154	1	2	1	2	5	3	1	2	2	1	2	1
1360	19	1	169	58	20.3074	2	2	1	2	3	4	1	3	2	1	2	2
1361	45	2	175	65	21.2245	2	1	1	1	6	1	2	1	1	1	2	2
1362	48	2	176	83	26.7949	3	1	1	1	7	4	1	3	2	1	2	1
1363	42	2	167	68	24.3824	2	2	1	1	5	1	1	2	2	1	2	1
1364	20	1	180	84	25.9259	3	1	1	1	3	4	1	1	1	2	2	1
1365	50	3	163	100	37.6378	4	2	1	2	5	1	2	2	2	1	3	2
1366	39	2	162	66	25.1486	3	2	4	1	5	2	1	3	2	2	4	3
1367	67	4	164	89	33.0904	4	2	1	1	5	1	3	3	2	1	4	2
1368	46	2	195	122	32.0842	4	1	1	2	5	4	2	2	2	1	3	1
1369	42	2	161	59	22.7615	2	2	1	1	6	4	2	2	2	1	3	2
1370	54	3	162	56	21.3382	2	2	1	2	6	4	1	3	2	1	2	2
1371	47	2	183	78	23.2912	2	1	1	2	5	2	2	2	2	1	2	2
1372	48	2	200	130	32.5	4	1	1	3	4	1	2	3	2	1	1	2
1373	42	2	178	85	26.8274	3	1	1	1	6	1	2	2	3	1	2	3
1374	30	2	170	53	18.3391	1	2	1	1	6	2	1	2	5	1	3	3
1375	40	2	165	75	27.5482	3	2	1	1	3	1	2	3	2	1	2	1
1376	57	3	160	60	23.4375	2	2	1	2	5	1	2	1	1	1	2	2
1377	34	2	165	55	20.202	2	2	1	1	6	4	1	2	2	2	3	2
1378	35	2	170	59	20.4152	2	2	1	1	6	3	1	2	2	2	3	3
1379	58	3	167	66	23.6652	2	2	1	2	5	4	2	3	2	2	3	2
1380	47	2	175	85	27.7551	3	1	1	3	1	4	3	3	2	3	2	3
1381	26	1	163	55	20.7008	2	2	1	1	5	2	1	3	2	1	4	2
1382	45	2	171	73	24.9649	2	2	1	1	6	4	1	1	1	1	5	3
1383	57	3	164	69	25.6544	3	2	1	1	5	2	2	2	2	2	2	3
1384	31	2	168	59	20.9042	2	2	1	1	6	4	1	2	2	1	3	2
1385	19	1	163	57	21.4536	2	2	1	1	3	3	1	2	2	2	2	1
1386	45	2	165	50	18.3655	1	2	1	1	6	4	1	3	2	1	2	2
1387	48	2	168	70	24.8016	2	2	1	1	6	1	2	3	3	1	4	3
1388	54	3	172	84	28.3937	3	2	1	1	5	3	1	3	2	1	2	2
1389	42	2	165	100	36.7309	4	2	1	1	4	1	2	3	2	2	3	2
1390	48	2	165	75	27.5482	3	2	1	1	5	4	1	3	2	1	1	3
1391	18	1	165	57	20.9366	2	2	1	2	3	4	2	2	2	1	3	2
1392	55	3	178	74	23.3556	2	2	1	1	5	2	2	2	2	1	3	2
1393	56	3	160	68	26.5625	3	2	1	2	6	2	2	3	2	1	2	2
1394	29	1	166	62	22.4996	2	2	1	1	6	3	1	3	2	2	2	2
1395	58	3	195	85	22.3537	2	1	1	3	5	4	1	1	1	1	2	2
1396	20	1	181	70	21.3669	2	1	1	1	3	4	1	3	2	1	2	3
1397	59	3	159	78	30.8532	4	2	1	2	5	2	2	2	2	2	3	2
1398	39	2	184	79	23.3341	2	1	1	1	6	1	2	3	5	1	1	1
1399	46	2	167	75	26.8923	3	2	1	1	3	1	1	2	2	1	2	2
1400	41	2	179	62	19.3502	2	2	1	1	5	3	1	3	2	1	2	2
1401	19	1	178	78	24.6181	2	1	1	1	3	4	1	3	2	1	4	3
1402	52	3	168	65	23.03	2	2	1	2	5	1	1	3	2	1	2	1
1403	49	2	163	71	26.7229	3	2	1	1	6	1	1	2	2	1	5	2
1404	53	3	165	55	20.202	2	2	1	1	5	4	1	3	2	1	2	1
1405	44	2	175	95	31.0204	4	1	1	1	3	1	2	2	5	2	2	2
1406	54	3	178	100	31.5617	4	1	1	3	5	4	2	2	2	1	2	2
1407	58	3	178	90	28.4055	3	1	1	2	5	3	1	1	1	1	2	3
1408	31	2	177	69	22.0243	2	1	1	1	5	1	1	3	2	2	4	2
1409	38	2	168	62	21.9671	2	2	1	2	5	2	1	1	1	1	3	2
1410	54	3	165	100	36.7309	4	2	1	1	6	4	2	3	2	1	4	3
1411	57	3	159	67	26.5021	3	2	1	2	5	4	2	1	1	3	2	3
1412	39	2	178	75	23.6713	2	2	1	1	5	4	2	3	2	2	3	1
1413	45	2	166	66	23.9512	2	2	1	1	5	4	2	2	2	2	2	2
1414	51	3	185	110	32.1402	4	1	1	1	5	2	2	3	2	1	2	2
1415	38	2	164	90	33.4622	4	2	1	1	4	1	2	2	3	3	4	3
1416	42	2	170	64	22.1453	2	2	1	1	5	4	2	3	2	1	3	3
1417	27	1	169	58	20.3074	2	2	1	1	5	4	1	3	2	1	2	2
1418	57	3	165	60	22.0386	2	2	1	1	6	2	1	2	2	1	2	3
1419	60	4	163	85	31.9922	4	2	1	1	6	1	2	3	2	1	2	2
1420	36	2	164	86	31.975	4	2	1	1	5	1	2	2	2	1	3	3
1421	48	2	176	101	32.6059	4	2	1	1	4	1	1	1	1	1	2	2
1422	39	2	182	86	25.963	3	1	1	1	4	4	1	1	1	1	2	1
1423	57	3	175	80	26.1224	3	1	1	1	6	4	1	1	1	2	2	2
1424	46	2	165	83	30.4867	4	2	1	1	6	2	2	2	2	1	3	2
1425	54	3	162	59	22.4813	2	2	1	2	6	4	2	2	5	1	2	3
1426	41	2	156	58	23.833	2	2	1	2	3	2	2	2	2	1	2	2
1427	49	2	166	74	26.8544	3	2	1	2	5	2	1	2	2	2	2	3
1428	49	2	177	75	23.9395	2	1	1	1	5	4	1	2	2	2	2	2
1429	44	2	167	60	21.5139	2	2	1	1	6	4	2	2	2	1	4	2
1430	22	1	160	74	28.9062	3	2	1	1	5	1	1	1	1	1	3	2
1431	33	2	165	84	30.854	4	2	1	3	4	3	2	3	5	1	2	3
1432	51	3	181	91	27.7769	3	1	1	1	6	4	1	2	2	2	2	2
1433	35	2	160	58	22.6562	2	2	1	2	6	4	1	3	2	1	3	2
1434	48	2	180	73	22.5309	2	2	1	1	6	4	2	2	2	1	3	2
1435	47	2	155	63	26.2227	3	2	1	1	6	1	1	3	2	1	4	2
1436	18	1	160	55	21.4844	2	2	1	1	3	4	1	2	2	2	2	2
1437	18	1	173	64	21.3839	2	2	1	2	3	4	1	2	2	2	3	2
1438	55	3	171	61	20.8611	2	1	1	1	6	4	3	3	2	1	3	5
1439	57	3	160	80	31.25	4	2	1	1	6	1	3	2	2	1	3	3
1440	55	3	169	98	34.3125	4	2	1	1	6	1	3	3	2	1	2	2
1441	50	3	158	70	28.0404	3	2	1	1	5	1	1	3	2	1	2	1
1442	38	2	160	61	23.8281	2	2	1	1	6	3	2	3	2	1	2	2
1443	57	3	158	42	16.8242	1	2	1	3	5	1	2	3	2	2	2	2
1444	43	2	163	64	24.0882	2	2	1	1	5	4	2	2	2	2	2	1
1445	56	3	163	49	18.4425	1	2	1	1	6	4	1	2	2	1	3	2
1446	57	3	174	79	26.0933	3	1	1	1	3	2	2	2	2	1	2	1
1447	47	2	200	80	20	2	2	1	1	7	4	3	1	1	1	3	4
1448	66	4	150	85	37.7778	4	2	1	2	5	1	3	3	2	1	2	3
1449	51	3	166	55	19.9594	2	2	1	1	7	4	1	1	1	1	2	2
1450	18	1	167	60	21.5139	2	2	1	2	5	2	1	1	1	1	4	2
1451	21	1	173	61	20.3816	2	2	1	1	3	4	1	3	2	1	2	2
1452	31	2	184	130	38.3979	4	1	1	1	6	4	2	3	2	3	2	1
1453	39	2	165	63	23.1405	2	2	1	1	6	2	1	3	2	1	2	1
1454	31	2	184	83	24.5156	2	1	1	1	5	4	1	2	3	1	2	2
1455	50	3	158	60	24.0346	2	1	1	1	6	1	1	1	1	2	2	2
1456	55	3	154	62	26.1427	3	2	1	2	5	1	1	3	2	2	3	2
1457	38	2	165	60	22.0386	2	2	1	1	6	2	1	3	3	1	1	1
1458	20	1	163	54	20.3244	2	2	1	1	3	4	1	1	1	2	3	3
1459	50	3	185	76	22.206	2	1	1	1	5	4	1	1	1	2	2	2
1460	46	2	156	98	40.2696	4	2	1	1	5	1	2	2	5	1	3	2
1461	44	2	166	69	25.0399	3	2	1	1	3	2	3	1	1	3	3	3
1462	53	3	180	76	23.4568	2	1	1	1	6	1	2	3	2	1	3	2
1463	44	2	161	49	18.9036	2	2	1	1	5	1	1	1	1	1	2	1
1464	45	2	168	54	19.1327	2	2	1	1	6	4	2	3	5	1	3	2
1465	39	2	192	87	23.6003	2	1	1	1	5	1	1	1	1	1	3	2
1466	53	3	178	90	28.4055	3	1	1	3	7	4	1	2	2	1	1	1
1467	41	2	173	54	18.0427	1	2	1	1	6	2	1	2	2	1	2	2
1468	47	2	181	91	27.7769	3	1	1	1	6	4	2	3	2	1	3	2
1469	42	2	170	113	39.1003	4	2	1	1	5	1	3	2	5	1	3	2
1470	52	3	174	92	30.3871	4	2	1	3	4	3	2	2	2	1	5	1
1471	36	2	158	70	28.0404	3	2	1	2	5	1	3	3	2	2	4	3
1472	61	4	173	96	32.0759	4	1	1	1	5	1	3	3	2	1	2	3
1473	18	1	156	53	21.7784	2	2	1	1	3	4	1	2	2	1	3	2
1474	54	3	160	70	27.3437	3	2	1	1	6	2	2	3	2	1	1	1
1475	45	2	166	69	25.0399	3	2	1	1	4	2	1	2	2	2	2	2
1476	51	3	164	57	21.1927	2	2	1	1	6	3	2	3	2	1	2	2
1477	56	3	179	116	36.2036	4	1	1	1	5	1	3	3	2	1	2	3
1478	52	3	172	85	28.7317	3	2	1	3	5	2	2	2	2	2	3	2
1479	58	3	187	88	25.1651	3	1	1	3	5	4	2	3	2	2	3	4
1480	56	3	165	63	23.1405	2	2	1	1	5	1	1	2	2	2	2	2
1481	49	2	167	58	20.7967	2	2	1	1	3	2	1	2	2	1	3	3
1482	42	2	164	52	19.3337	2	2	1	1	6	1	2	3	2	1	3	3
1483	53	3	179	88	27.4648	3	1	1	1	6	1	2	3	2	1	1	2
1484	38	2	168	80	28.3447	3	2	1	1	4	4	2	3	2	2	2	2
1485	57	3	165	67	24.6097	2	2	1	1	5	4	2	3	2	1	2	2
1486	60	4	163	72	27.0993	3	2	1	1	6	1	1	2	2	1	2	2
1487	49	2	175	90	29.3878	3	2	1	2	6	2	3	2	2	2	2	2
1488	51	3	158	60	24.0346	2	2	1	1	5	4	2	1	1	2	2	2
1489	57	3	173	84	28.0664	3	2	1	1	5	2	2	2	2	1	2	2
1490	42	2	182	92	27.7744	3	1	1	3	6	4	2	2	3	1	2	2
1491	43	2	158	52	20.83	2	2	1	1	6	4	1	2	2	1	2	2
1492	53	3	168	98	34.7222	4	2	1	1	6	2	2	2	2	1	4	3
1493	45	2	169	63	22.0581	2	1	1	1	6	2	2	1	1	2	1	2
1494	20	1	180	73	22.5309	2	1	1	1	3	4	2	3	2	1	3	3
1495	70	5	164	80	29.7442	3	2	1	1	6	3	2	2	3	1	4	2
1496	54	3	177	70	22.3435	2	2	1	1	6	2	2	3	2	1	2	2
1497	60	4	165	95	34.8944	4	2	1	1	6	4	2	2	2	1	3	3
1498	42	2	164	67	24.9108	2	2	1	1	5	2	1	2	2	2	2	3
1499	64	4	168	79	27.9904	3	1	1	1	6	4	1	2	5	2	2	3
1500	43	2	175	80	26.1224	3	1	1	1	6	4	1	3	5	2	2	2
1501	49	2	163	57	21.4536	2	2	1	1	5	4	1	1	1	1	2	2
1502	61	4	170	70	24.2215	2	1	1	1	5	1	2	3	2	1	2	2
1503	45	2	165	70	25.7117	3	2	1	1	6	2	1	3	2	1	2	2
1504	54	3	179	81	25.2801	3	1	1	1	5	2	2	3	2	1	3	3
1505	43	2	163	47	17.6898	1	2	1	3	3	1	3	3	2	2	3	2
1506	36	2	165	75	27.5482	3	2	1	1	3	1	3	1	1	1	4	4
1507	38	2	177	97	30.9617	4	1	1	1	6	1	2	3	5	2	3	2
1508	61	4	163	71	26.7229	3	2	1	2	6	4	2	2	5	1	3	2
1509	44	2	175	74	24.1633	2	1	1	1	7	4	1	3	2	1	2	2
1510	52	3	158	65	26.0375	3	2	1	1	5	4	1	1	1	2	3	2
1511	54	3	183	98	29.2633	3	1	1	1	5	2	2	3	2	2	2	3
1512	56	3	185	97	28.3419	3	1	1	1	5	1	1	1	1	1	2	2
1513	45	2	165	82	30.1194	4	2	1	1	3	1	2	3	2	1	2	3
1514	28	1	164	54	20.0773	2	2	1	2	6	3	1	2	2	1	3	2
1515	52	3	174	53	17.5056	1	2	1	1	3	1	2	2	2	2	3	1
1516	56	3	162	54	20.5761	2	2	1	1	4	4	1	3	2	1	2	2
1517	20	1	170	52	17.9931	1	2	1	1	3	4	3	2	2	1	2	1
1518	48	2	168	73	25.8645	3	1	1	1	7	1	2	3	2	1	2	3
1519	22	1	166	75	27.2173	3	2	1	1	3	1	1	1	1	1	3	3
1520	63	4	171	99	33.8566	4	1	1	1	5	1	2	3	5	2	2	3
1521	47	2	182	69	20.8308	2	1	1	1	5	2	1	1	1	1	2	2
1522	49	2	168	58	20.5499	2	2	1	1	5	4	2	2	2	1	2	1
1523	50	3	161	70	27.0051	3	2	1	1	6	3	2	1	1	1	2	2
1524	55	3	160	85	33.2031	4	2	1	1	5	1	2	2	2	1	2	2
1525	51	3	191	109	29.8786	3	1	1	1	5	3	1	1	1	1	2	2
1526	18	1	158	80	32.0461	4	2	1	1	3	4	2	3	2	1	3	2
1527	38	2	175	60	19.5918	2	1	1	1	5	2	1	1	1	1	2	2
1528	44	2	169	62	21.7079	2	2	1	1	3	1	2	2	2	1	2	3
1529	56	3	163	60	22.5827	2	2	1	1	5	2	2	2	2	1	2	2
1530	56	3	174	118	38.9748	4	2	1	1	5	3	2	3	2	1	2	1
1531	56	3	156	77	31.6404	4	2	1	1	6	3	3	2	2	1	5	3
1532	42	2	176	58	18.7242	2	2	1	1	6	4	1	3	2	1	2	2
1533	52	3	187	79	22.5914	2	1	1	1	3	1	3	2	2	1	3	3
1534	34	2	175	84	27.4286	3	1	1	1	6	4	2	3	2	1	2	2
1535	44	2	165	61	22.4059	2	2	1	1	6	4	2	2	2	2	3	2
1536	46	2	160	60	23.4375	2	2	1	1	3	1	3	2	5	1	3	2
1537	47	2	168	59	20.9042	2	2	1	1	6	1	1	3	2	1	2	1
1538	45	2	162	63	24.0055	2	2	2	1	6	2	2	3	3	1	3	3
1539	18	1	164	63	23.4236	2	2	1	1	3	4	1	1	1	2	2	1
1540	20	1	173	62	20.7157	2	2	1	1	3	4	3	1	1	2	2	3
1541	41	2	180	63	19.4444	2	2	1	1	2	4	3	3	5	1	2	2
1542	56	3	176	80	25.8264	3	1	1	1	6	4	2	2	2	1	2	1
1543	41	2	170	70	24.2215	2	2	1	1	6	2	2	1	1	1	2	2
1544	49	2	171	63	21.5451	2	2	1	1	6	4	3	2	2	1	3	3
1545	21	1	165	50	18.3655	1	2	1	1	3	1	1	1	1	2	2	1
1546	44	2	171	80	27.3588	3	1	1	1	5	2	2	1	1	2	1	1
1547	19	1	166	56	20.3223	2	2	1	3	3	4	1	1	1	2	3	2
1548	19	1	177	61	19.4708	2	1	1	1	3	4	1	1	1	2	2	2
1549	44	2	158	50	20.0288	2	2	1	1	6	1	1	2	2	1	2	2
1550	34	2	170	75	25.9516	3	2	1	1	6	3	1	2	2	1	3	3
1551	53	3	164	67	24.9108	2	2	1	1	5	2	2	3	2	1	3	2
1552	34	2	176	68	21.9525	2	2	1	1	3	3	1	1	1	1	1	1
1553	43	2	178	84	26.5118	3	1	1	1	5	4	2	2	5	1	2	2
1554	49	2	170	70	24.2215	2	2	1	1	6	4	2	3	2	1	2	1
1555	45	2	164	79	29.3724	3	2	1	3	6	4	1	3	2	1	2	2
1556	19	1	163	79	29.7339	3	2	1	1	3	4	2	3	2	1	2	2
1557	52	3	163	72	27.0993	3	2	1	1	3	1	2	2	2	1	3	3
1558	54	3	160	96	37.5	4	2	1	1	5	1	2	3	2	1	2	2
1559	58	3	145	68	32.3424	4	2	1	1	5	4	2	1	1	2	1	1
1560	58	3	184	100	29.5369	3	1	1	1	5	4	1	1	1	1	2	2
1561	25	1	177	82	26.1738	3	1	1	1	5	4	1	2	2	2	2	2
1562	46	2	164	68	25.2826	3	2	1	2	6	4	1	2	5	2	3	2
1563	61	4	167	50	17.9282	1	2	1	1	5	1	2	2	5	1	3	2
1564	48	2	170	60	20.7612	2	2	1	1	4	4	2	3	2	2	3	1
1565	59	3	174	89	29.3962	3	2	1	2	7	3	1	3	2	1	2	2
1566	53	3	174	92	30.3871	4	1	1	1	5	1	3	3	3	1	3	3
1567	52	3	177	95	30.3233	4	1	1	2	6	1	3	2	2	1	3	2
1568	62	4	195	98	25.7725	3	1	1	1	6	2	2	2	5	1	2	3
1569	40	2	174	87	28.7356	3	1	1	1	6	2	2	3	3	1	3	2
1570	39	2	167	67	24.0238	2	2	1	1	5	3	1	3	5	1	3	3
1571	54	3	180	98	30.2469	4	1	1	1	6	3	2	2	2	3	4	3
1572	43	2	160	89	34.7656	4	2	1	1	4	4	2	2	2	1	2	2
1573	56	3	160	49	19.1406	2	2	1	2	5	4	2	2	2	1	2	2
1574	51	3	186	90	26.0146	3	1	1	2	6	4	2	2	2	2	4	3
1575	50	3	165	63	23.1405	2	2	1	1	5	4	1	2	2	3	2	2
1576	56	3	186	82	23.7022	2	1	1	2	5	4	3	2	2	1	3	2
1577	56	3	164	65	24.1672	2	2	1	1	6	4	1	3	2	1	3	2
1578	46	2	165	63	23.1405	2	2	1	2	6	3	1	3	2	1	2	2
1579	46	2	181	73	22.2826	2	1	1	1	7	1	1	2	2	1	2	1
1580	51	3	183	102	30.4578	4	1	1	1	7	1	2	2	2	1	2	2
1581	50	3	174	75	24.7721	2	2	1	1	5	1	2	3	5	1	2	1
1582	47	2	183	103	30.7564	4	1	1	2	5	4	2	2	3	3	5	1
1583	51	3	171	63	21.5451	2	2	1	1	6	1	2	1	1	1	2	2
1584	49	2	165	60	22.0386	2	2	1	1	5	2	1	3	2	1	2	2
1585	45	2	160	50	19.5312	2	2	1	1	5	1	1	1	1	1	1	2
1586	32	2	150	75	33.3333	4	2	1	2	3	1	2	2	2	1	3	2
1587	31	2	170	117	40.4844	4	2	1	1	5	1	2	1	1	2	4	1
1588	37	2	158	53	21.2306	2	2	1	1	5	2	1	2	2	1	4	2
1589	45	2	166	85	30.8463	4	2	1	2	5	3	2	3	2	1	2	1
1590	55	3	160	48	18.75	2	2	1	1	5	4	2	2	2	1	2	2
1591	54	3	162	110	41.9143	4	2	1	2	5	3	2	3	2	1	2	2
1592	43	2	171	72	24.623	2	1	1	1	5	2	2	3	2	1	2	1
1593	31	2	178	70	22.0932	2	2	1	1	6	1	2	2	2	1	2	2
1594	40	2	180	90	27.7778	3	1	1	1	5	4	1	1	1	2	3	3
1595	57	3	178	84	26.5118	3	1	1	1	6	3	2	1	1	1	1	3
1596	57	3	162	75	28.578	3	2	1	1	6	2	1	1	1	1	2	3
1597	45	2	165	60	22.0386	2	2	1	1	5	3	2	2	2	2	2	2
1598	39	2	166	55	19.9594	2	2	1	2	6	3	1	2	2	1	2	1
1599	48	2	178	93	29.3524	3	1	1	1	6	2	2	3	2	1	2	2
1600	47	2	182	109	32.9067	4	1	1	2	5	1	2	3	2	1	5	1
1601	49	2	191	94	25.7668	3	1	1	1	6	2	1	1	1	1	3	3
1602	55	3	155	58	24.1415	2	2	1	2	5	1	2	2	2	1	4	2
1603	51	3	169	78	27.31	3	2	1	1	4	1	2	2	2	1	2	1
1604	45	2	165	90	33.0579	4	2	1	1	5	1	2	3	2	1	2	3
1605	43	2	181	94	28.6927	3	1	1	1	6	1	1	3	3	1	1	2
1606	35	2	165	57	20.9366	2	2	1	1	6	4	1	3	2	2	2	2
1607	43	2	165	76	27.9155	3	2	1	1	5	2	1	2	5	2	2	1
1608	50	3	175	60	19.5918	2	2	1	1	5	3	1	2	2	2	2	2
1609	54	3	167	72	25.8166	3	2	1	2	3	1	2	2	2	1	2	3
1610	46	2	169	80	28.0102	3	2	1	1	5	1	1	2	2	1	2	2
1611	50	3	158	107	42.8617	4	2	1	1	6	2	2	3	2	1	3	3
1612	46	2	175	100	32.6531	4	2	1	3	5	1	2	2	2	1	2	1
1613	47	2	168	86	30.4705	4	2	1	2	6	1	4	3	2	1	2	3
1614	47	2	160	59	23.0469	2	2	1	1	5	2	1	2	5	1	2	1
1615	42	2	180	106	32.716	4	1	1	1	6	2	2	3	2	2	2	1
1616	55	3	169	66	23.1084	2	2	1	1	6	4	1	2	2	1	4	3
1617	54	3	170	75	25.9516	3	2	1	1	6	1	2	3	2	1	1	2
1618	47	2	162	60	22.8624	2	2	1	2	4	2	2	2	2	1	2	2
1619	35	2	152	62	26.8352	3	2	1	2	5	1	1	2	2	1	3	1
1620	27	1	164	70	26.0262	3	2	1	2	5	1	2	2	2	1	2	1
1621	51	3	166	91	33.0237	4	1	1	2	3	1	2	2	2	1	3	2
1622	48	2	165	100	36.7309	4	2	1	2	6	1	3	2	2	1	3	2
1623	40	2	166	68	24.677	2	2	1	1	4	2	2	3	2	1	3	2
1624	33	2	173	89	29.737	3	1	1	2	4	1	2	1	1	1	3	2
1625	52	3	160	63	24.6094	2	2	1	2	6	4	1	2	2	1	4	3
1626	40	2	165	78	28.6501	3	2	1	2	5	1	2	1	1	2	1	1
1627	53	3	168	81	28.699	3	1	1	1	6	4	1	3	5	1	2	2
1628	47	2	166	75	27.2173	3	2	1	1	5	1	1	2	2	2	2	1
1629	45	2	161	72	27.7767	3	2	1	1	5	1	2	2	2	2	3	3
1630	49	2	202	116	28.4286	3	1	1	1	7	4	1	3	5	1	2	1
1631	64	4	163	70	26.3465	3	2	1	1	6	4	2	1	1	1	3	2
1632	39	2	165	57	20.9366	2	2	1	2	5	2	1	1	1	1	3	3
1633	55	3	171	73	24.9649	2	2	1	1	6	4	1	3	2	1	2	3
1634	50	3	160	80	31.25	4	2	1	1	6	3	2	3	3	2	5	3
1635	48	2	179	99	30.8979	4	1	1	1	4	4	2	3	2	1	2	2
1636	47	2	165	60	22.0386	2	2	1	1	6	3	1	3	2	1	2	2
1637	48	2	171	66	22.571	2	2	1	1	5	2	2	1	1	1	2	3
1638	54	3	170	80	27.6817	3	1	1	2	6	4	1	2	2	1	2	2
1639	54	3	165	66	24.2424	2	2	1	2	3	1	2	1	1	1	2	2
1640	42	2	160	51	19.9219	2	2	1	1	6	1	2	3	5	1	2	2
1641	47	2	170	90	31.1419	4	2	1	1	3	3	2	2	2	1	2	2
1642	44	2	170	59	20.4152	2	2	1	1	5	4	1	3	5	6	3	2
1643	56	3	186	90	26.0146	3	1	1	1	5	4	1	3	2	1	3	2
1644	44	2	160	67	26.1719	3	2	1	1	7	2	2	2	5	2	3	2
1645	60	4	160	70	27.3437	3	2	1	3	5	4	2	3	2	2	3	3
1646	36	2	185	118	34.4777	4	1	1	1	5	4	2	3	5	1	4	3
1647	39	2	165	115	42.2406	4	2	1	1	6	1	3	2	2	1	2	3
1648	45	2	175	58	18.9388	2	2	1	1	5	1	2	3	5	1	2	3
1649	50	3	170	70	24.2215	2	2	1	1	6	4	2	3	2	1	2	2
1650	51	3	168	71	25.1559	3	2	1	1	5	1	1	1	1	1	2	3
1651	50	3	162	60	22.8624	2	2	1	1	5	4	2	1	1	2	2	2
1652	40	2	185	111	32.4324	4	1	1	2	7	2	3	2	2	1	2	2
1653	45	2	165	70	25.7117	3	2	1	1	5	4	1	2	2	1	2	2
1654	47	2	155	61	25.3902	3	2	1	1	6	4	2	2	2	1	2	1
1655	54	3	162	65	24.7676	2	2	1	1	2	1	2	1	1	1	2	1
1656	48	2	163	57	21.4536	2	2	1	1	5	4	1	2	2	1	3	2
1657	63	4	156	50	20.5457	2	2	1	1	5	4	1	3	5	1	3	2
1658	44	2	171	90	30.7787	4	1	1	1	3	3	2	1	1	1	3	5
1659	45	2	163	65	24.4646	2	2	1	2	7	2	1	2	2	2	2	3
1660	39	2	165	115	42.2406	4	2	1	1	6	1	3	1	1	1	2	3
1661	42	2	185	80	23.3747	2	1	1	1	5	4	1	3	3	1	2	1
1662	56	3	163	85	31.9922	4	2	1	2	5	1	2	1	1	1	3	2
1663	43	2	167	75	26.8923	3	2	1	1	5	1	2	2	2	1	3	3
1664	55	3	156	68	27.9421	3	2	1	1	6	1	1	2	2	1	3	2
1665	41	2	153	65	27.7671	3	2	1	1	4	4	2	2	2	2	2	3
1666	44	2	158	55	22.0317	2	2	1	2	6	3	2	2	3	1	3	2
1667	58	3	162	62	23.6244	2	2	5	2	6	2	2	2	2	1	2	1
1668	55	3	170	62	21.4533	2	2	1	1	7	1	2	3	2	2	2	2
1669	45	2	165	57	20.9366	2	2	1	1	6	2	2	2	2	1	2	3
1670	20	1	178	53	16.7277	1	2	1	1	3	4	1	3	2	3	3	1
1671	57	3	172	92	31.0979	4	1	1	1	5	1	2	2	2	1	2	2
1672	48	2	170	105	36.3322	4	1	1	1	3	1	2	2	2	1	2	2
1673	45	2	168	76	26.9274	3	2	1	1	5	1	2	3	2	2	2	1
1674	66	4	170	67	23.1834	2	2	1	2	5	2	3	2	2	1	1	2
1675	40	2	181	90	27.4717	3	1	1	3	7	2	1	1	1	2	1	2
1676	26	1	185	93	27.1731	3	1	1	2	5	4	1	1	1	3	2	2
1677	20	1	170	70	24.2215	2	2	1	1	3	1	1	3	2	1	3	3
1678	55	3	167	70	25.0995	3	2	1	2	5	4	2	2	2	1	3	2
1679	56	3	177	77	24.5779	2	1	1	2	7	2	3	1	1	1	2	2
1680	48	2	183	130	38.8187	4	1	1	1	5	1	2	2	2	1	2	3
1681	23	1	169	52	18.2066	1	2	1	1	5	2	1	3	2	1	3	2
1682	59	3	160	65	25.3906	3	2	1	1	5	2	2	1	1	1	2	2
1683	58	3	180	106	32.716	4	1	1	1	6	1	2	2	5	1	2	2
1684	42	2	176	63	20.3383	2	2	1	2	5	2	2	1	1	1	2	2
1685	37	2	159	65	25.711	3	2	1	2	5	1	1	2	5	1	3	2
1686	49	2	170	80	27.6817	3	2	1	1	7	1	2	2	2	2	2	2
1687	48	2	170	62	21.4533	2	2	1	1	6	4	2	2	2	1	2	2
1688	58	3	176	73	23.5666	2	1	1	1	5	2	1	3	2	1	2	2
1689	43	2	171	54	18.4672	1	2	1	1	6	4	2	2	2	1	3	2
1690	42	2	178	78	24.6181	2	2	1	1	6	1	2	3	2	1	3	3
1691	58	3	179	97	30.2737	4	1	1	1	6	1	2	2	2	3	2	2
1692	36	2	165	72	26.4463	3	2	1	1	5	4	1	2	2	2	4	2
1693	39	2	170	71	24.5675	2	2	1	1	6	4	1	3	2	1	2	2
1694	46	2	160	70	27.3437	3	2	1	1	5	4	2	2	3	1	2	2
1695	28	1	163	54	20.3244	2	2	1	1	5	4	1	2	2	1	2	1
1696	44	2	164	58	21.5645	2	2	1	1	6	4	1	2	2	1	3	2
1697	53	3	167	73	26.1752	3	2	1	1	5	4	1	3	2	1	3	1
1698	56	3	158	73	29.2421	3	2	1	1	6	1	1	2	2	2	3	3
1699	57	3	158	68	27.2392	3	2	1	2	6	1	1	1	1	1	2	3
1700	19	1	171	78	26.6749	3	1	1	1	3	2	1	1	1	1	3	1
1701	43	2	162	56	21.3382	2	2	1	1	5	3	2	2	5	2	2	2
1702	34	2	160	75	29.2969	3	2	1	2	4	3	2	2	5	1	3	2
1703	45	2	164	69	25.6544	3	2	1	1	6	4	1	3	2	1	2	1
1704	28	1	183	69	20.6038	2	2	1	1	6	2	2	3	2	1	3	2
1705	51	3	172	132	44.6187	4	1	1	2	3	1	4	2	3	1	4	2
1706	29	1	160	61	23.8281	2	2	1	1	6	4	2	2	2	1	3	2
1707	20	1	165	74	27.1809	3	2	1	1	4	3	3	1	1	2	2	2
1708	30	2	168	66	23.3844	2	2	1	2	3	1	2	1	1	2	3	2
1709	45	2	162	63	24.0055	2	2	1	1	5	1	1	1	1	2	2	2
1710	37	2	167	74	26.5338	3	2	1	2	6	1	2	1	1	1	3	2
1711	52	3	175	90	29.3878	3	1	1	2	5	4	1	2	3	1	2	3
1712	43	2	158	64	25.6369	3	2	1	1	6	2	1	2	2	1	2	2
1713	52	3	168	75	26.5731	3	2	1	2	5	1	2	1	1	1	3	3
1714	46	2	162	73	27.8159	3	2	1	1	3	1	2	1	1	1	3	2
1715	45	2	160	55	21.4844	2	2	1	1	5	2	2	2	5	1	2	2
1716	60	4	170	77	26.6436	3	1	1	1	6	4	1	2	5	2	2	2
1717	56	3	152	80	34.626	4	2	1	1	6	2	2	2	2	1	3	2
1718	39	2	163	80	30.1103	4	2	1	1	6	2	2	3	5	1	2	1
1719	42	2	185	90	26.2966	3	1	1	1	5	4	1	2	5	2	2	1
1720	61	4	164	81	30.116	4	2	1	1	6	1	2	2	5	1	2	1
1721	60	4	168	135	47.8316	4	2	1	1	6	1	2	2	2	2	2	3
1722	59	3	164	56	20.8209	2	2	1	1	5	1	2	3	3	1	2	2
1723	42	2	200	90	22.5	2	1	1	3	7	2	1	1	1	1	1	2
1724	53	3	183	120	35.8327	4	1	1	1	3	4	3	2	2	1	2	1
1725	52	3	183	109	32.548	4	1	1	2	4	4	2	1	1	2	2	2
1726	57	3	166	80	29.0318	3	2	1	1	5	4	2	2	2	1	2	1
1727	44	2	163	48	18.0662	1	2	1	2	5	1	1	2	2	1	3	2
1728	60	4	165	72	26.4463	3	2	1	2	6	3	1	2	3	1	2	1
1729	42	2	162	57	21.7193	2	2	1	1	5	4	1	2	2	1	1	1
1730	47	2	158	61	24.4352	2	2	1	1	5	3	2	2	2	2	2	2
1731	55	3	168	100	35.4308	4	1	1	1	4	4	2	2	2	1	2	2
1732	53	3	176	184	59.4008	4	1	1	1	6	2	2	3	2	1	2	1
1733	55	3	157	62	25.1532	3	2	1	1	5	2	1	2	2	2	3	2
1734	54	3	167	100	35.8564	4	1	1	1	3	4	2	3	2	1	4	3
1735	52	3	160	59	23.0469	2	2	1	1	6	1	1	2	2	1	2	2
1736	52	3	156	67	27.5312	3	2	1	2	5	2	1	3	2	1	2	1
1737	42	2	161	70	27.0051	3	2	1	2	6	1	1	3	2	2	3	2
1738	46	2	166	64	23.2254	2	2	1	1	6	3	1	2	2	1	4	2
1739	50	3	160	63	24.6094	2	2	1	1	5	4	1	2	2	1	2	2
1740	20	1	166	99	35.9268	4	2	1	1	3	4	2	2	2	2	3	2
1741	45	2	165	80	29.3848	3	2	1	1	6	1	3	3	2	1	3	2
1742	62	4	182	99	29.8877	3	1	1	3	5	2	2	1	1	1	1	2
1743	57	3	170	85	29.4118	3	2	1	1	5	4	1	3	2	1	1	1
1744	49	2	165	54	19.8347	2	2	1	1	3	2	1	1	1	1	2	3
1745	50	3	182	103	31.0953	4	1	1	1	6	2	2	1	1	1	5	5
1746	46	2	177	76	24.2587	2	1	1	2	6	4	1	2	2	1	2	2
1747	52	3	160	60	23.4375	2	2	1	1	6	4	2	1	1	2	2	2
1748	60	4	162	70	26.6728	3	2	1	1	6	3	2	3	2	1	2	3
1749	58	3	183	89	26.5759	3	1	1	2	5	1	2	2	2	2	3	5
1750	64	4	178	90	28.4055	3	1	1	1	6	1	1	2	5	2	2	2
1751	58	3	162	70	26.6728	3	2	1	2	5	1	1	3	2	1	2	2
1752	55	3	162	58	22.1003	2	2	1	1	6	1	2	2	2	1	2	2
1753	59	3	180	95	29.321	3	1	1	1	5	1	3	2	2	1	2	3
1754	40	2	163	65	24.4646	2	2	1	2	6	4	1	1	1	2	2	2
1755	44	2	163	92	34.6268	4	2	1	1	6	4	2	3	5	2	2	2
1756	51	3	178	80	25.2493	3	1	1	1	6	3	1	2	5	1	2	2
1757	49	2	176	74	23.8895	2	2	1	1	5	2	2	3	2	1	2	3
1758	51	3	167	72	25.8166	3	2	1	1	6	4	1	3	3	1	2	1
1759	65	4	176	82	26.4721	3	1	1	1	5	2	2	2	2	1	2	2
1760	47	2	153	52	22.2137	2	2	1	2	5	2	2	3	2	1	2	2
1761	60	4	163	83	31.2394	4	1	1	2	5	1	2	2	5	1	2	2
1762	43	2	167	100	35.8564	4	2	1	1	5	1	2	1	1	1	3	2
1763	42	2	168	72	25.5102	3	2	1	1	5	2	2	2	2	1	2	2
1764	53	3	161	50	19.2894	2	2	1	1	6	4	1	1	1	1	2	2
1765	54	3	171	77	26.3329	3	2	2	1	6	1	2	1	1	1	3	2
1766	44	2	165	85	31.2213	4	2	1	1	5	1	2	3	2	1	2	2
1767	42	2	160	60	23.4375	2	2	1	2	4	4	1	1	1	2	2	2
1768	54	3	167	63	22.5896	2	2	1	1	6	4	2	2	2	1	2	3
1769	54	3	158	79	31.6456	4	2	1	1	4	1	2	1	1	2	3	1
1770	56	3	166	66	23.9512	2	2	1	2	3	1	2	2	2	1	2	1
1771	36	2	160	80	31.25	4	2	1	1	6	4	2	2	2	1	2	3
1772	52	3	173	73	24.3911	2	2	1	1	6	4	1	3	2	1	2	3
1773	53	3	160	70	27.3437	3	2	1	1	3	1	2	2	2	1	2	2
1774	52	3	161	68	26.2336	3	2	1	2	6	1	2	1	1	2	2	3
1775	46	2	171	90	30.7787	4	2	1	1	6	4	2	2	2	3	4	2
1776	54	3	175	73	23.8367	2	1	1	1	5	2	2	1	1	2	5	2
1777	36	2	170	85	29.4118	3	2	1	2	6	1	2	3	2	1	2	2
1778	47	2	161	60	23.1473	2	2	1	2	3	3	2	2	2	1	3	2
1779	57	3	183	85	25.3815	3	1	1	1	5	1	1	2	2	1	2	2
1780	50	3	187	100	28.5968	3	1	1	2	5	1	2	2	2	1	3	2
1781	52	3	160	56	21.875	2	2	1	1	6	4	1	2	2	1	2	1
1782	26	1	173	77	25.7276	3	2	1	2	6	4	2	3	2	1	2	1
1783	49	2	160	58	22.6562	2	2	1	1	5	4	2	2	2	1	2	1
1784	54	3	168	64	22.6757	2	2	1	1	5	4	2	2	2	1	2	2
1785	56	3	182	74	22.3403	2	1	1	1	6	4	1	1	1	2	3	3
1786	60	4	169	69	24.1588	2	2	1	1	5	3	2	2	5	1	2	2
1787	52	3	165	80	29.3848	3	2	1	1	5	1	2	1	1	1	3	2
1788	46	2	168	64	22.6757	2	2	1	1	5	1	1	2	2	2	3	2
1789	52	3	168	85	30.1162	4	2	1	1	6	1	2	2	2	2	3	2
1790	49	2	170	78	26.9896	3	1	1	1	5	2	1	3	2	1	2	1
1791	30	2	161	54	20.8325	2	2	1	2	3	3	2	1	1	1	3	2
1792	56	3	172	79	26.7036	3	2	1	2	5	4	1	3	2	1	2	3
1793	40	2	163	68	25.5937	3	2	1	1	6	4	1	2	5	2	2	2
1794	34	2	177	77	24.5779	2	1	1	1	6	4	2	3	2	1	2	2
1795	48	2	159	72	28.4799	3	2	1	1	6	4	2	2	2	1	2	1
1796	52	3	187	103	29.4547	3	1	1	2	6	4	1	2	5	2	1	3
1797	49	2	172	56	18.9292	2	2	1	1	5	1	1	3	2	1	2	2
1798	41	2	165	88	32.3232	4	2	1	2	6	2	3	3	2	1	3	4
1799	47	2	166	63	22.8625	2	2	1	1	6	3	1	2	3	1	3	2
1800	59	3	185	95	27.7575	3	1	1	1	6	2	2	1	1	1	2	2
1801	54	3	156	67	27.5312	3	2	1	1	5	4	1	2	3	2	2	2
1802	50	3	187	107	30.5985	4	1	1	1	5	4	2	3	2	2	3	2
1803	54	3	172	83	28.0557	3	2	1	2	5	1	2	3	2	1	3	2
1804	39	2	160	60	23.4375	2	2	1	1	6	1	1	3	2	1	2	2
1805	35	2	172	98	33.126	4	2	1	1	6	1	2	3	3	1	2	2
1806	19	1	174	73	24.1115	2	1	1	2	3	4	1	1	1	1	2	2
1807	18	1	176	53	17.11	1	1	1	2	3	4	1	1	1	2	2	1
1808	58	3	167	78	27.968	3	2	1	1	6	3	3	2	2	1	3	2
1809	48	2	189	115	32.1939	4	1	1	2	5	4	2	2	2	1	2	2
1810	44	2	170	78	26.9896	3	2	1	1	6	1	2	3	2	1	2	1
1811	20	1	163	52	19.5717	2	2	1	2	3	4	1	1	1	1	4	2
1812	45	2	167	90	32.2708	4	2	1	1	4	2	2	3	2	1	5	2
1813	44	2	160	80	31.25	4	2	1	2	6	2	2	2	2	1	2	4
1814	60	4	163	75	28.2284	3	2	1	1	5	1	2	2	5	1	3	2
1815	19	1	168	58	20.5499	2	2	1	2	3	4	1	1	1	2	3	2
1816	46	2	159	103	40.7421	4	2	1	1	3	1	2	1	1	1	3	2
1817	57	3	174	77	25.4327	3	2	1	1	5	3	2	2	2	1	3	2
1818	19	1	167	56	20.0796	2	2	1	3	3	4	1	3	2	1	3	2
1819	53	3	173	59	19.7133	2	2	1	2	6	4	2	2	2	2	2	1
1820	48	2	165	88	32.3232	4	2	1	1	3	1	3	3	2	1	1	1
1821	48	2	187	75	21.4476	2	1	1	1	6	4	2	3	2	1	2	2
1822	48	2	174	85	28.075	3	2	1	2	3	4	2	2	2	2	2	2
1823	46	2	165	59	21.6713	2	2	1	1	6	1	1	3	3	1	2	1
1824	19	1	185	69	20.1607	2	2	1	2	3	4	1	1	1	2	3	2
1825	48	2	180	110	33.9506	4	1	1	1	3	4	2	1	1	1	2	1
1826	43	2	164	65	24.1672	2	2	1	1	6	1	2	2	5	2	3	2
1827	21	1	181	70	21.3669	2	1	1	3	3	3	1	2	5	3	3	3
1828	19	1	165	50	18.3655	1	2	1	1	3	4	1	3	2	2	3	2
1829	58	3	182	81	24.4536	2	1	1	1	6	4	2	2	2	1	2	2
1830	53	3	176	90	29.0548	3	1	1	1	5	1	2	3	2	1	2	2
1831	21	1	195	102	26.8245	3	1	1	2	3	3	1	1	1	3	3	2
1832	40	2	165	67	24.6097	2	2	1	1	5	1	1	3	5	1	3	2
1833	54	3	160	50	19.5312	2	2	1	1	5	3	1	3	2	1	1	1
1834	44	2	164	65	24.1672	2	2	1	1	5	3	1	3	2	2	2	2
1835	53	3	174	76	25.1024	3	1	1	2	7	4	2	3	2	1	3	3
1836	57	3	168	91	32.2421	4	2	1	1	5	1	2	3	2	1	2	2
1837	58	3	178	103	32.5085	4	1	1	1	3	1	3	2	2	2	2	2
1838	42	2	159	50	19.7777	2	2	1	1	4	1	2	3	2	1	3	1
1839	47	2	182	86	25.963	3	1	1	3	5	1	2	1	1	3	2	2
1840	21	1	172	67	22.6474	2	2	1	1	5	2	2	2	2	3	4	3
1841	47	2	164	78	29.0006	3	2	1	1	5	3	2	2	2	2	2	2
1842	53	3	170	90	31.1419	4	1	1	2	5	4	2	3	2	1	2	1
1843	53	3	172	81	27.3797	3	1	1	1	7	4	3	1	1	1	2	2
1844	35	2	154	54	22.7694	2	2	1	1	6	3	1	3	2	1	3	2
1845	47	2	174	107	35.3415	4	1	1	1	3	4	3	3	2	1	2	2
1846	51	3	182	97	29.2839	3	1	1	1	6	4	2	3	2	1	2	2
1847	47	2	159	64	25.3155	3	2	1	1	6	1	3	3	2	1	2	2
1848	58	3	170	79	27.3356	3	1	1	1	5	1	1	3	5	1	2	3
1849	55	3	172	68	22.9854	2	2	1	1	6	4	1	3	2	1	2	3
1850	42	2	167	67	24.0238	2	2	1	1	5	2	2	3	5	1	2	2
1851	48	2	193	99	26.5779	3	1	1	2	6	1	1	3	2	1	2	1
1852	25	1	163	70	26.3465	3	2	1	1	3	4	2	2	2	1	3	2
1853	52	3	168	70	24.8016	2	2	1	2	5	1	2	1	1	1	2	3
1854	62	4	175	112	36.5714	4	1	1	1	5	2	2	3	3	1	1	3
1855	45	2	171	61	20.8611	2	2	1	1	5	2	1	1	1	2	2	2
1856	52	3	174	63	20.8086	2	2	1	1	3	4	1	2	2	1	2	2
1857	49	2	180	75	23.1481	2	2	1	2	6	4	2	2	5	1	2	2
1858	56	3	174	82	27.0842	3	1	1	1	6	4	3	3	2	1	2	2
1859	58	3	175	63	20.5714	2	1	1	2	6	1	1	3	2	1	2	1
1860	49	2	162	62	23.6244	2	2	1	1	5	1	2	1	1	1	2	3
1861	44	2	179	80	24.968	2	2	1	1	6	4	2	3	3	1	2	1
1862	47	2	168	85	30.1162	4	2	1	1	6	4	2	3	2	1	2	2
1863	44	2	182	98	29.5858	3	1	1	1	5	3	2	1	1	1	3	2
1864	39	2	170	77	26.6436	3	2	1	1	6	4	1	2	2	2	3	2
1865	55	3	181	99	30.2189	4	1	1	1	5	1	2	2	2	1	2	2
1866	48	2	163	75	28.2284	3	2	1	3	6	1	1	2	2	2	2	2
1867	53	3	178	73	23.04	2	1	1	1	4	4	1	1	1	1	3	2
1868	48	2	180	80	24.6914	2	1	1	2	6	3	3	3	5	1	3	2
1869	19	1	171	69	23.597	2	2	1	2	3	4	1	1	1	1	3	3
1870	60	4	163	63	23.7118	2	2	1	1	6	3	2	2	5	2	2	2
1871	35	2	168	72	25.5102	3	2	1	2	5	4	1	2	2	1	2	2
1872	57	3	163	69	25.9701	3	2	1	2	6	4	2	2	2	1	2	3
1873	40	2	169	50	17.5064	1	2	1	1	6	2	1	3	2	1	2	1
1874	47	2	168	110	38.9739	4	2	1	3	6	3	2	1	1	3	2	1
1875	53	3	166	98	35.5639	4	2	1	1	5	1	3	2	2	2	2	2
1876	55	3	168	58	20.5499	2	2	1	2	6	4	3	2	5	1	4	4
1877	38	2	177	96	30.6425	4	1	1	1	6	1	2	2	5	1	2	2
1878	38	2	168	57	20.1956	2	2	1	1	5	4	1	2	2	1	2	2
1879	40	2	180	88	27.1605	3	1	1	1	6	4	2	2	2	1	2	2
1880	45	2	157	51	20.6905	2	2	1	1	6	2	1	2	2	1	2	2
1881	46	2	162	57	21.7193	2	2	1	1	3	4	1	2	2	1	2	1
1882	56	3	175	71	23.1837	2	1	1	2	3	4	2	1	1	1	2	3
1883	36	2	172	141	47.6609	4	2	1	1	6	1	3	2	2	1	2	2
1884	46	2	165	75	27.5482	3	2	1	1	6	4	2	3	2	1	3	3
1885	33	2	174	108	35.6718	4	1	1	3	4	4	2	3	5	1	2	2
1886	38	2	165	57	20.9366	2	2	1	1	2	4	2	1	1	1	1	1
1887	36	2	170	57	19.7232	2	2	1	1	6	1	1	2	5	1	2	2
1888	40	2	185	90	26.2966	3	2	1	1	5	2	4	3	2	1	2	2
1889	54	3	160	55	21.4844	2	2	1	1	7	2	2	3	2	1	2	2
1890	48	2	161	56	21.6041	2	2	1	2	5	1	1	3	2	2	2	2
1891	27	1	157	52	21.0962	2	2	1	2	5	4	1	1	1	1	2	2
1892	29	1	158	70	28.0404	3	2	1	1	4	1	2	3	2	1	2	2
1893	61	4	182	82	24.7555	2	1	1	1	5	3	1	1	1	1	3	2
1894	55	3	178	76	23.9869	2	1	1	3	5	4	1	1	1	1	2	1
1895	45	2	160	120	46.875	4	2	1	2	5	1	2	3	2	1	2	3
1896	34	2	176	102	32.9287	4	2	1	1	5	1	2	1	1	1	2	2
1897	43	2	170	60	20.7612	2	2	1	1	3	4	2	2	2	2	2	2
1898	46	2	164	59	21.9363	2	2	1	1	3	2	3	3	2	1	4	2
1899	47	2	175	109	35.5918	4	1	1	2	6	1	3	2	2	2	3	2
1900	48	2	163	62	23.3355	2	2	1	1	4	2	2	3	2	1	4	2
1901	50	3	171	65	22.2291	2	2	1	1	6	4	2	1	1	2	2	1
1902	39	2	178	76	23.9869	2	2	1	1	5	2	1	2	2	2	3	2
1903	51	3	163	96	36.1323	4	2	1	1	6	4	3	1	1	1	2	2
1904	41	2	162	78	29.7211	3	2	1	1	6	4	2	2	5	1	3	2
1905	36	2	183	80	23.8884	2	1	1	1	4	4	2	1	1	1	2	3
1906	39	2	177	78	24.8971	2	1	1	1	4	1	2	3	3	1	2	1
1907	45	2	166	55	19.9594	2	2	1	1	6	2	1	3	2	1	2	2
1908	37	2	166	62	22.4996	2	2	1	2	7	2	2	1	1	2	2	3
1909	57	3	165	67	24.6097	2	2	1	2	6	2	1	3	2	1	3	3
1910	52	3	187	97	27.7389	3	1	1	2	7	2	1	3	2	1	3	5
1911	47	2	164	62	23.0518	2	2	1	1	3	4	1	1	1	1	2	1
1912	51	3	164	76	28.257	3	2	1	2	6	2	1	3	2	2	3	3
1913	52	3	168	62	21.9671	2	2	1	1	6	4	1	2	2	2	2	3
1914	39	2	174	87	28.7356	3	1	1	2	6	3	1	1	1	2	2	2
1915	44	2	164	67	24.9108	2	2	1	1	5	1	1	3	2	2	4	2
1916	49	2	166	86	31.2092	4	2	1	1	3	1	2	2	2	1	2	1
1917	47	2	165	63	23.1405	2	2	1	1	5	2	2	3	2	1	2	2
1918	40	2	175	68	22.2041	2	2	1	3	5	2	1	1	1	1	2	2
1919	59	3	187	92	26.309	3	1	1	3	5	1	2	2	2	2	2	3
1920	52	3	176	62	20.0155	2	2	1	2	5	1	1	2	2	1	2	2
1921	58	3	183	80	23.8884	2	1	1	1	5	1	3	2	2	1	3	3
1922	58	3	175	75	24.4898	2	1	1	1	6	1	2	3	2	1	1	2
1923	35	2	156	55	22.6003	2	2	1	2	5	1	2	3	5	1	2	1
1924	42	2	162	62	23.6244	2	2	1	1	5	2	1	2	2	2	2	2
1925	36	2	158	47	18.8271	2	2	1	2	5	2	2	3	2	1	4	3
1926	46	2	186	94	27.1708	3	1	1	1	3	4	1	1	1	1	2	1
1927	57	3	175	90	29.3878	3	1	1	2	3	1	2	3	2	1	2	2
1928	52	3	167	75	26.8923	3	2	1	2	5	1	2	3	2	1	2	2
1929	51	3	160	72	28.125	3	2	1	1	5	3	2	2	2	1	2	2
1930	44	2	165	78	28.6501	3	2	1	1	6	4	1	2	2	1	3	3
1931	58	3	175	105	34.2857	4	1	1	1	3	4	3	1	1	1	3	4
1932	49	2	160	62	24.2187	2	2	1	1	5	2	3	2	2	2	3	2
1933	38	2	168	66	23.3844	2	2	1	1	5	1	2	3	2	1	3	2
1934	42	2	160	86	33.5937	4	2	1	1	6	4	2	1	1	1	3	1
1935	52	3	190	96	26.5928	3	1	1	1	7	1	2	2	2	1	3	1
1936	40	2	160	60	23.4375	2	2	1	1	6	1	2	2	5	2	3	2
1937	42	2	158	59	23.634	2	2	1	1	5	1	3	3	2	1	2	1
1938	39	2	169	70	24.5089	2	2	1	1	3	2	1	1	1	1	2	1
1939	38	2	160	60	23.4375	2	2	1	1	3	1	2	3	2	1	1	1
1940	54	3	170	75	25.9516	3	1	1	1	6	4	1	1	1	1	4	4
1941	29	1	164	64	23.7954	2	2	1	1	6	4	1	2	2	1	2	2
1942	34	2	169	102	35.713	4	2	1	1	5	4	3	2	3	2	4	2
1943	55	3	164	75	27.8852	3	2	1	1	5	3	2	2	2	1	3	2
1944	49	2	166	69	25.0399	3	2	1	1	4	2	2	1	1	1	3	2
1945	49	2	179	94	29.3374	3	1	1	1	6	3	2	2	2	2	3	2
1946	53	3	169	73	25.5593	3	2	1	1	6	1	1	2	2	2	3	2
1947	45	2	159	65	25.711	3	2	1	3	5	1	3	1	1	2	2	3
1948	40	2	165	75	27.5482	3	2	1	1	3	1	2	2	2	1	2	3
1949	45	2	172	83	28.0557	3	1	1	1	5	1	2	2	3	1	2	2
1950	52	3	169	103	36.0632	4	1	1	1	6	1	2	1	1	1	3	4
1951	61	4	170	75	25.9516	3	1	1	3	5	1	1	1	1	1	2	1
1952	39	2	171	75	25.6489	3	2	1	1	5	1	2	2	2	2	3	3
1953	51	3	185	110	32.1402	4	1	1	1	5	1	2	3	2	1	2	2
1954	46	2	176	99	31.9602	4	1	1	1	4	1	3	2	5	1	2	2
1955	41	2	168	56	19.8413	2	2	1	3	5	1	2	2	2	1	4	3
1956	60	4	169	69	24.1588	2	2	1	1	5	1	2	2	5	1	1	2
1957	43	2	177	91	29.0466	3	1	1	1	6	2	1	3	2	1	3	2
1958	42	2	184	105	31.0137	4	1	1	1	5	1	3	1	1	3	2	1
1959	59	3	179	74	23.0954	2	1	1	1	5	4	1	2	2	2	2	2
1960	27	1	156	64	26.2985	3	2	1	1	6	4	1	3	2	2	3	2
1961	54	3	161	60	23.1473	2	2	1	1	6	2	2	3	2	1	3	2
1962	41	2	168	92	32.5964	4	1	1	2	5	1	2	1	1	1	4	2
1963	43	2	158	100	40.0577	4	2	1	1	3	3	2	3	2	1	3	1
1964	46	2	166	56	20.3223	2	2	1	1	6	2	2	3	2	1	2	2
1965	48	2	180	81	25	3	1	1	2	6	1	1	1	1	2	2	2
1966	20	1	172	63	21.2953	2	2	1	2	3	3	1	3	2	1	3	2
1967	55	3	156	67	27.5312	3	2	1	1	5	2	2	2	2	1	2	2
1968	43	2	157	72	29.2101	3	2	1	2	6	1	1	1	1	1	2	2
1969	54	3	165	75	27.5482	3	2	1	1	7	2	1	1	1	1	3	2
1970	56	3	169	75	26.2596	3	1	1	1	5	4	2	3	5	1	2	2
1971	60	4	170	85	29.4118	3	2	1	2	3	1	3	3	2	1	4	3
1972	52	3	168	82	29.0533	3	2	1	2	5	3	1	1	1	1	2	2
1973	27	1	165	62	22.7732	2	2	1	2	5	1	1	2	2	1	3	2
1974	46	2	173	70	23.3887	2	2	1	1	5	3	2	2	2	1	4	2
1975	30	2	157	68	27.5873	3	2	1	1	6	2	1	1	1	2	3	3
1976	57	3	190	89	24.6537	2	1	1	1	5	2	2	3	2	1	2	2
1977	55	3	167	70	25.0995	3	2	1	1	5	1	2	3	2	1	2	2
1978	44	2	175	95	31.0204	4	2	1	2	6	1	2	3	2	1	2	2
1979	34	2	172	99	33.464	4	1	1	1	4	1	2	2	2	1	3	2
1980	34	2	170	68	23.5294	2	2	1	1	6	4	2	1	1	1	2	1
1981	52	3	160	48	18.75	2	2	1	1	6	1	3	2	2	2	2	3
1982	37	2	170	100	34.6021	4	2	1	1	5	4	2	1	1	1	2	1
1983	56	3	160	90	35.1562	4	2	1	1	5	3	2	2	2	1	2	1
1984	42	2	177	85	27.1314	3	1	1	1	5	4	1	2	3	1	2	2
1985	47	2	182	65	19.6232	2	2	1	2	5	4	1	2	5	1	2	1
1986	43	2	165	67	24.6097	2	2	1	1	6	4	1	3	2	1	2	2
1987	58	3	162	102	38.866	4	2	1	1	7	1	4	3	2	1	2	2
1988	41	2	165	61	22.4059	2	2	1	1	6	2	2	1	1	2	2	3
1989	56	3	175	98	32	4	1	1	1	5	2	2	1	1	1	2	3
1990	50	3	160	58	22.6562	2	2	1	1	6	2	2	3	2	1	2	2
1991	34	2	158	57	22.8329	2	2	1	1	6	4	1	3	2	1	3	2
1992	39	2	167	68	24.3824	2	2	1	1	6	3	1	2	3	1	2	2
1993	58	3	166	68	24.677	2	2	1	1	6	4	2	3	2	1	1	1
1994	32	2	164	60	22.3081	2	2	1	1	6	3	1	2	2	2	2	1
1995	51	3	171	83	28.3848	3	2	1	1	5	3	2	2	2	1	2	2
1996	54	3	160	64	25	3	2	1	1	6	2	1	3	2	1	3	2
1997	54	3	165	73	26.8136	3	2	1	3	6	2	2	1	1	1	3	3
1998	54	3	180	86	26.5432	3	1	1	1	6	1	1	1	1	2	2	1
1999	52	3	162	67	25.5296	3	2	1	1	5	4	3	2	5	1	2	1
[truncated: 3,830 more rows]
